# 1 Control of Hox transcription factor concentration 2 and cell-to-cell variability by an auto-regulatory 3 switch

4  
5 **Dimitrios K. Papadopoulos<sup>1,\*</sup>, Kassiani Skouloudaki<sup>1</sup>, Ylva Engström<sup>2</sup>, Lars  
6 Terenius<sup>3</sup>, Rudolf Rigler<sup>4,5</sup>, Christoph Zechner<sup>1,6</sup>, Vladana Vukojević<sup>3</sup> and Pavel  
7 Tomancak<sup>1,\*</sup>**

8  
9 <sup>1</sup>Max-Planck Institute of Molecular Cell Biology and Genetics, 01307 Dresden,  
10 Germany

11 <sup>2</sup>Department of Molecular Biosciences, The Wenner-Gren Institute, Stockholm  
12 University, 10691 Stockholm, Sweden

13 <sup>3</sup>Center for Molecular Medicine (CMM), Department of Clinical Neuroscience,  
14 Karolinska Institutet, 17176 Stockholm, Sweden

15 <sup>4</sup>Department of Medical Biochemistry and Biophysics, Karolinska Institutet, 17177  
16 Stockholm, Sweden

17 <sup>5</sup>Laboratory of Biomedical Optics, Swiss Federal Institute of Technology, 1015  
18 Lausanne, Switzerland

19 <sup>6</sup>Center for Systems Biology Dresden, 01307, Dresden, Germany

20 \*Correspondence: [papadopo@mpi-cbg.de](mailto:papadopo@mpi-cbg.de) and [tomancak@mpi-cbg.de](mailto:tomancak@mpi-cbg.de)

21  
22 Author contributions: DKP and VV, designed and performed the binding study of  
23 *Antp*, analyzed the data; DKP and KS, designed and performed the study of *Antp*  
24 relative transcript abundance, analyzed the data; YE, provided the *Antp* P1 and P2  
25 reporter lines; DKP and PT, conceived the comparative analysis of TFs and the  
26 examination of *Antp* variability in second instar imaginal discs; CZ, developed the  
27 mathematical model of stochastic *Antp* expression, DKP, conceived the project,  
28 designed and performed all remaining experiments, analyzed the data, prepared  
29 figures and wrote the manuscript with critical input from KS, YE, CZ, VV and PT; all  
30 authors critically reviewed the manuscript and approved it for submission.

## 31 **Abstract**

32 Concentration of transcription factors (TFs) and their cell-to-cell protein  
33 variability are important functional determinants in development, yet how variability is  
34 controlled remains poorly understood. Using Fluorescence Correlation Spectroscopy  
35 (FCS), we characterized in live *Drosophila* imaginal discs the concentration and cell-  
36 to-cell variability of 14 endogenously tagged TFs. We found that the Hox TF  
37 Antennapedia (Antp) transitioned from a low concentration/high variability state early  
38 in development to a high concentration/low variability state later in development.  
39 Using FCS and temporally resolved genetic studies, we uncovered that Antp is  
40 necessary and sufficient to drive a developmental regulatory switch from auto-  
41 activation to auto-repression, thereby reducing variability. This switch is controlled by  
42 a progressive change in relative concentrations of preferentially activating and  
43 repressing Antp protein isoforms, which bind to chromatin with different affinities. We  
44 derived a simple mathematical model, confirming that the Antp auto-regulatory circuit  
45 would suffice to increase protein concentration while suppressing variability over  
46 time.

47

## 48 **Introduction**

49 In order to understand the mechanisms that control pattern formation and cell  
50 fate specification in developing organisms, the intranuclear concentration, DNA-  
51 binding kinetics and cell-to-cell variability of relevant TFs need to be quantitatively  
52 characterized. TF concentration variability at the tissue level is thought to arise from  
53 diverse processes, including mRNA transcription, protein production and  
54 degradation. For example, gene transcription in a given tissue is a noisy process.  
55 The noise is due to stochastic binding and interactions of proteins involved in

56 transcriptional activation of the specific gene (intrinsic noise) (Blake et al., 2003;  
57 Elowitz et al., 2002) and also due to differences among cells in terms of abundance  
58 of the transcriptional and post-transcriptional cellular machinery which affects the  
59 efficiency of transcriptional activation in general (extrinsic noise) (Swain et al., 2002).  
60 These can influence the expression and production of functional protein, resulting in  
61 protein concentration that exhibits variability among cells.

62 In undifferentiated tissue or cells, TF cell-to-cell variability can be the driving  
63 force for differentiation. For example, progressive establishment of a Nanog salt-and-  
64 pepper expression pattern leads to the formation of primitive endoderm in the mouse  
65 preimplantation embryo, whereas loss of the variability results in embryos lacking  
66 primitive endoderm entirely (Kang et al., 2013). In *Drosophila*, the Senseless (Sens)  
67 TF is required for the establishment of proper number of sensory organ precursors in  
68 the ectodermal proneural cluster of cells and unequal concentration among cells is  
69 required for their specification (Li et al., 2006). Moreover, variability in concentration  
70 (rather than its overall average concentration) of the Yan TF drives the transition of  
71 developing photoreceptor cells to a differentiated state during *Drosophila* eye  
72 development (Pelaez et al., 2015).

73 Conversely, in already differentiated tissue or cells, TF expression variability  
74 among cells may need to be counteracted to ensure homogeneity of gene  
75 expression patterns and robustness of commitment to a certain transcriptional  
76 regime. Such homogenization of expression levels has been identified for the Snail  
77 (Sna) TF, which is required for the invagination of the mesoderm during *Drosophila*  
78 gastrulation (Boettiger and Levine, 2013), or the Bicoid (Bcd) and Hunchback (Hb)  
79 TFs during early embryogenesis (Gregor et al., 2007a; Gregor et al., 2007b; Little et  
80 al., 2013). These studies have quantified the tolerable degrees of concentration

81 variability that allow establishment of gene expression territories with remarkable  
82 precision in the developing embryo.

83 In addition, differential fates within the same developmental territory may be  
84 specified by TFs deploying different DNA-binding dynamics despite the existence of  
85 very similar concentrations (i.e. low variability). For example, studies on the Oct4 TF  
86 in early mouse embryos have shown that differential kinetic behavior of DNA binding,  
87 despite equal Oct4 concentration among blastomeres, ultimately dictates an early  
88 developmental bias towards lineage segregation (Kaur et al., 2013; Plachta et al.,  
89 2011).

90 So far, gene expression variability studies have focused predominantly on  
91 monitoring the noise of mRNA production (Holloway et al., 2011; Holloway and  
92 Spirov, 2015; Little et al., 2013; Lucas et al., 2013; Pare et al., 2009). Little  
93 information exists about TF variability at the protein level within a tissue, since  
94 studies of this sort would require the use of quantitative methods with single-  
95 molecule sensitivity.

96 We have previously used Fluorescence Microscopy Imaging and FCS, to  
97 study Hox TF interactions with nuclear DNA in living salivary gland cells  
98 (Papadopoulos et al., 2015; Vukojevic et al., 2010). FCS has also been instrumental  
99 for the quantification of TF dynamics in living cells or tissue in several recent studies  
100 (Clark et al., 2016; Kaur et al., 2013; Lam et al., 2012; Mistri et al., 2015;  
101 Papadopoulos et al., 2015; Perez-Camps et al., 2016; Szaloki et al., 2015; Tiwari et  
102 al., 2013; Tsutsumi et al., 2016). Yet, in these studies, protein mobility has been  
103 measured in overexpressing systems. However, to understand TF behavior *in vivo*,  
104 proteins need to be quantified at endogenous levels (Lo et al., 2015).



105 In this study, we take advantage of the availability of fly toolkits, in which TFs  
106 have been endogenously tagged by different methodologies: fosmid, BAC, FlyTrap  
107 and MiMIC lines (Buszczak et al., 2007; Ejsmont et al., 2011; Ejsmont et al., 2009;  
108 Kelso et al., 2004; Morin et al., 2001; Quinones-Coello et al., 2007; Sarov et al.,  
109 2016; Venken et al., 2011), to measure the intranuclear concentration of various TFs  
110 *in vivo* by FCS, and their cell-to-cell variability in several fly imaginal discs. The  
111 imaginal discs are flat, single-layered epithelia comprised of small diploid cells and  
112 many TFs are expressed in defined regions within these tissues during development.  
113 In this system, we found that Antp, a well-characterized homeotic selector gene,  
114 responsible for specification of thoracic identity in fly tissues, displayed high cell-to-  
115 cell variability during early disc development and this variability was suppressed at  
116 later developmental stages. Through a combination of genetics, single-molecule  
117 measurements of TF dynamics by FCS and computational modeling, we uncovered  
118 a mechanism that controls Antp concentration and variability in developing discs.

119

## 120 **Results**

121

122 Characterization of average protein concentrations and cell-to-cell variability of

123 *Drosophila* TFs

124 Average concentrations of TFs in neighboring nuclei of third instar imaginal  
125 discs were measured by FCS (Figure 1 A-J and Figure 1 – figure supplement 1 A-P).  
126 FCS is a non-invasive method with single molecule sensitivity, in which a confocal  
127 arrangement of optical elements is used to generate a small (sub-femtoliter) volume  
128 inside living cells, from which fluorescence is being detected (Figure 1 C and D,  
129 green ellipsoid). Fluorescent molecules diffuse through this observation volume,

130 yielding fluorescence intensity fluctuations that are recorded over time by detectors  
131 with single-photon sensitivity (Figure 1 E). These fluctuations are subsequently  
132 subjected to temporal autocorrelation analysis, yielding temporal autocorrelation  
133 curves (henceforth referred to as FCS curves, Figure 1 F), which are then fitted with  
134 selected models to extract quantitative information about the dynamic processes  
135 underlying the generation of the recorded fluctuations. In the case of molecular  
136 movement of TFs (Supplement 1), information can be obtained regarding: a) the  
137 absolute concentrations of TFs (Figure 1 F), (b) TF dynamic properties, such as:  
138 diffusion times, differences in their interactions with chromatin and fractions of free-  
139 diffusing *versus* chromatin-bound TFs (Figure 1 G); and c) TF cell-to-cell  
140 concentration variability (Figure 1 H).

141 For the 14 selected TFs, we measured average concentrations ranging about  
142 two orders of magnitude among different TFs, from  $\sim 30$  nM to  $\sim 1.1$   $\mu$ M (Figure 1 I  
143 and Figure 1 – figure supplement 1 A-Q). We also obtained various diffusion times  
144 and fractions of slow and fast diffusing TF molecules (Figure 1 J), indicating  
145 differential mobility and degree of DNA-binding among different TFs (Vukojevic et al.,  
146 2010). Comparison of the y-axis amplitudes at the smallest lag time of the FCS  
147 curves (the points at which the FCS curves cross the y-axis), which are inversely  
148 proportional to the concentration of fluorescent molecules (Figure 1 F), gives  
149 information about concentration variability (heterogeneity) among different cell  
150 nuclei, i.e. reflects heterogeneity of protein concentration at the tissue level (Figure 1  
151 H). We measured the variability of all 14 TFs in our dataset (expressed as the  
152 variance over the mean squared,  $CV^2 = \frac{s^2}{m^2}$ ) to be in the range 7 – 37% (Figure 1 K  
153 and Figure 1 – figure supplement 1 Q). These numbers are consistent with previous

154 observations (Sanchez et al., 2011). We then used this dataset as a starting point for  
155 studying the control of variability during imaginal disc development.

156         Since low variability at the tissue level is likely to be achieved through some  
157 active mechanism that controls it, we searched for TFs that exhibited low variability  
158 and relatively high concentrations. One TF, the Hox gene *Antp*, had comparatively  
159 lower variability ( $CV^2 < 0.2$ ) for its high average concentrations (Figure 1 K), in  
160 particular in the leg disc. This distinction prompted us to measure variability of *Antp*  
161 at different concentrations by examining clusters of neighboring cells from across the  
162 disc displaying different average expression levels (Figure 1 L). Because FCS  
163 performs best at low to moderate expression levels, we performed this analysis in  
164 the wing disc (Figure 1 L). We established that the observed fluorescence intensity  
165 fluctuations were caused by diffusion of TF molecules through the illuminated  
166 confocal volume (Figure 1 – figure supplement 2 and Supplement 1). Our data  
167 showed that *Antp* cell-to-cell variability decreased with increasing *Antp* concentration  
168 (Figure 1 M), suggesting complex transcriptional regulatory processes (Franz et al.,  
169 2011; Smolander et al., 2011) that we further investigated using the powerful  
170 *Drosophila* genetic toolkit.

171

### 172 Control of *Antp* concentration by transcriptional auto-regulation

173         One mechanism by which genes control their expression level variability is  
174 auto-regulation (Beckeski and Serrano, 2000; Dublanche et al., 2006; Gronlund et al.,  
175 2013; Nevozhay et al., 2009; Shimoga et al., 2013; Thattai and van Oudenaarden,  
176 2001). To test whether *Antp* can regulate its own protein levels, we monitored the  
177 concentration of endogenous *Antp* protein upon overexpression of *Antp* from a  
178 transgene. To distinguish between overexpressed and endogenous protein, we used

179 synthetic Antp (SynthAntp) transgenes fused to eGFP (SynthAntp-eGFP). These  
180 transgenes encode the Antp homeodomain, the conserved YPWM motif and the C  
181 terminus (but lack the long and non-conserved N terminus of the protein, against  
182 which Antp antibodies have been raised) and they harbor Antp-specific homeotic  
183 function (Papadopoulos et al., 2011). Clonal overexpression of *SynthAntp-eGFP* in  
184 the wing disc notum (Figure 2 A-B' and controls in Figure 2 – figure supplement 1 D  
185 and D') repressed the endogenous Antp protein, indicating that Antp is indeed able  
186 to regulate its own protein levels.

187         Since Antp is a TF, we next asked whether the auto-repression indeed occurs  
188 at the transcriptional level. The *Antp* locus is subject to complex transcriptional  
189 regulation, involving a distal and a proximal promoter (P1 and P2 promoters,  
190 respectively), spanning more than 100 kb of regulatory sequences. We established  
191 that the P1 promoter (rather than the P2 promoter) is predominantly required to drive  
192 expression of Antp in the wing disc notum (Figure 2 – figure supplement 1 A-C'), in  
193 line with previous observations ((Engstrom et al., 1992; Jorgensen and Garber,  
194 1987; Zink et al., 1991) and Materials and Methods). Moreover, mitotic  
195 recombination experiments in regions of the wing disc unique to P2 transcription  
196 have shown no function of the P2 promoter transcripts in wing disc development  
197 (Abbott and Kaufman, 1986). Thus, the P1 Antp reporter serves as a suitable  
198 reporter of the *Antp* locus transcriptional activity in this context.

199         Clonal overexpression of SynthAntp-eGFP in the wing disc repressed the  
200 *Antp* P1 transcriptional reporter (Figure 2 C and C' and controls in Figure 2 – figure  
201 supplement 1 E and E'). To rule out putative dominant negative activity of the small  
202 synthetic Antp-eGFP peptide, we also performed these experiments with the full-  
203 length Antp protein (Figure 2 – figure supplement 1 F and F'). We conclude that the

204 Antp protein is able to repress its own transcription from the P1 promoter, suggesting  
205 a possible mechanism of suppressing cell-to-cell variability of Antp expression levels  
206 (Figure 2 D).

207 In the course of these experiments, we noticed that ectopic overexpression of  
208 *SynthAntp-eGFP* or the full-length Antp protein from the *Distal-less (Dll)* (MD23)  
209 enhancer surprisingly resulted in activation of the *Antp* P1 reporter in distal  
210 compartments of the wing disc, such as the wing pouch, where Antp is normally not  
211 detected (Figure 2 E-F' and controls in figure 2 – figure supplement 1 G-H'). This  
212 finding suggests that next to its auto-repressing function, Antp is also capable to  
213 activate its own transcription (Figure 2 G).

214 To exclude that the auto-activation and repression of Antp are artifacts of  
215 overexpression, we measured by FCS the concentration of Antp triggered by  
216 different Gal4-drivers and found it to directly correlate with the degree of its homeotic  
217 transformation capacity (Figure 2 – figure supplement 2 A-I). Importantly, we  
218 observed indistinguishable DNA-binding behavior not only across the whole  
219 concentration range examined (Figure 2 – figure supplement 2 J), but also between  
220 endogenous and overexpressed Antp (Figure 2 – figure supplement 3 A-B).  
221 Importantly, the auto-activating and auto-repressing capacity of Antp was preserved  
222 even with the weak Gal4-driver *69B* (Figure 2 – figure supplement 2 K-P) that  
223 triggered concentrations of Antp slightly lower than its normal concentration in the  
224 wing disc (473 nM versus 501 nM), indicating that auto-activation and auto-  
225 repression of Antp take place at endogenous concentrations.

226 We conclude that, Antp is able to repress and activate its own transcription  
227 (Figure 2 D and G) and hypothesize that this auto-regulatory circuit somehow sets  
228 the correct concentration of Antp protein in imaginal discs.

229

230 A temporal switch controls the transition of *Antp* from a state of auto-activation to a  
231 state of auto-repression

232 To further investigate the mechanism by which the *Antp* auto-regulatory circuit  
233 sets the *Antp* expression levels precisely, we next asked whether the seemingly  
234 opposing auto-regulatory activities of *Antp* are separated in time during  
235 development. To that end, we induced gain-of-function clones of full-length untagged  
236 *Antp* either at 26 h (first larval instar – henceforth referred to as “early” stage) or at  
237 60 h (late second larval instar – henceforth referred to as “late” stage) of  
238 development and analyzed the clones in late third instar wing imaginal discs (Figure  
239 3). As a pre-requisite for this analysis, we established that the *Antp*-eGFP  
240 homozygous viable MiMIC allele recapitulates the endogenous *Antp* pattern in the  
241 embryo and all thoracic imaginal discs and therefore can be used to monitor  
242 endogenous *Antp* protein (Figure 3 – figure supplement 1). Clonal induction of full-  
243 length untagged *Antp* in early development triggered strong auto-activation of *Antp*-  
244 eGFP (Figure 3 A, B and B’ and controls in Figure 3 – figure supplement 2 A-C’). As  
245 before, we confirmed that early auto-activation of *Antp* is transcriptional and similar  
246 for both full-length and Synth*Antp* proteins (Figure 3 – figure supplement 2 D-E’ and  
247 controls in F-G’). Early auto-activation was further supported by a loss-of-function  
248 experiment, where *RNAi*-mediated early knockdown of *Antp* resulted in  
249 downregulation of the *Antp* reporter (Figure 3 C and C’ and controls in Figure 3 –  
250 figure supplement 2 H and H’). The loss and gain-of-function analysis together  
251 suggest that during early disc development *Antp* is required for sustaining its own  
252 expression.

253 In contrast, clonal induction during the late second instar stage (Figure 3 F)  
254 repressed Antp-eGFP (Figure 3 G and G') and, reciprocally, the clonal knockdown  
255 by *RNAi* triggered auto-activation of Antp transcription (Figure 3 H and H'). Hence, in  
256 contrast to early development, Antp represses its own expression in third instar  
257 discs.

258 While the gain-of-function experiments show that Antp is sufficient to execute  
259 auto-regulation, loss-of-function analysis indicates that it is also necessary for both  
260 repression and activation at the transcriptional level.

261 Together, these results revealed the existence of a switch in Antp auto-  
262 regulatory capacity on its own transcription during development. Starting from a  
263 preferentially auto-activating state early in development (Figure 3 D), it changes into  
264 an auto-inhibitory mode at later developmental stages (Figure 3 I).

265

266 Antp switches from a low-concentration/high-variability to a high-concentration/low-  
267 variability state

268 If the *Antp* auto-repressive state limits the variability of Antp protein  
269 concentration among neighboring cells late in development, we expected that the  
270 variability would be higher during earlier stages, when auto-repression does not  
271 operate. We, therefore, monitored the endogenous expression levels and cell-to-cell  
272 variability of Antp nuclear concentration in second instar wing and leg discs by FCS.  
273 We observed significantly lower average concentrations of Antp protein in second  
274 versus third instar wing and leg discs and the inverse was true for concentration  
275 variability (Figure 3 E and Figure 3 – figure supplement 3 A, A' and C), indicating that  
276 the developmental increase in concentration is accompanied by suppression of  
277 concentration variability. In addition, FCS analysis revealed a notable change in Antp

278 characteristic decay times (signifying molecular diffusion, limited by chromatin-  
279 binding) at early versus late stages (Figure 3 E and Figure 3 – figure supplement 3  
280 B). This behavior indicates that endogenous Antp is initially fast moving in the  
281 nucleus and undergoes considerably fewer interactions with chromatin, compared to  
282 later stages where its interactions with chromatin are more frequent and longer  
283 lasting.

284 Taken together, our FCS measurements show that *Antp* is expressed at  
285 relatively low and highly variable levels in early developing discs, when genetic  
286 evidence indicates auto-activation capacity on its own transcription. Later in  
287 development, when Antp has reached a state of higher average concentrations,  
288 auto-repression kicks in, resulting in considerably lower variability among  
289 neighboring cells.

290

#### 291 Dynamic control of Antp auto-regulation by different Antp isoforms

292 The changing binding behavior of Antp on chromatin from second to third  
293 instar discs and the developmental transition from an auto-activating to an auto-  
294 repressing state suggested a causal relationship between the two phenomena. We,  
295 therefore, sought to identify molecular mechanisms that could link the observed  
296 changes in Antp chromatin-binding to Antp auto-activation and repression. It is well  
297 established that the Antp mRNA contains an alternative splice site in exon 7  
298 immediately upstream of the homeobox-containing exon 8, and generates Antp  
299 isoforms differing in as little as 4 amino acids in the linker between the YPWM motif  
300 (a cofactor-interacting motif) and the homeodomain (Figure 4 A) (Stroeher et al.,  
301 1988). Our previous observation that long linker isoforms favor transcriptional  
302 activation of Antp target genes, whereas short linker ones favor repression of Antp



303 targets (Papadopoulos et al., 2011), prompted us to examine whether the linker  
304 length is also responsible for differences in auto-regulation.

305 Ectopic expression of SynthAntp-eGFP peptides featuring a long linker  
306 displayed significantly weaker repression capacity on endogenous Antp, as  
307 compared to their short linker counterparts (Figure 4 B, B', F and F' and quantified in  
308 D and H, see also Materials and Methods). We confirmed that, also in this case, the  
309 repression was at the transcriptional level (Figure 4 – figure supplement 1 I-J').  
310 Inversely, long linker Antp isoforms exhibited stronger activation of Antp reporter, as  
311 compared to short linker ones (Figure 4 C, C', G, G' and quantified in D and H, see  
312 also Materials and Methods). We, additionally, validated that short linker isoforms  
313 encoded by full-length or SynthAntp cDNAs behaved as weaker auto-activating and  
314 stronger auto-repressing Antp species in all our previous experiments of  
315 endogenous Antp protein and P1 reporter (Figure 4 – figure supplement 1 A-H'). We  
316 conclude that, also in the case of Antp auto-regulation, short linker isoforms function  
317 as more potent repressors, whereas long linker ones operate as more potent  
318 activators.

319 Since the Antp P1 promoter unit changes its configuration from preferential  
320 auto-activation to auto-repression, and short and long linker Antp isoforms function  
321 as preferential auto-repressors and auto-activators, it appeared possible that the  
322 switch in Antp regulation is executed at the level of transcript variant abundance of  
323 these isoforms. Therefore, we next quantified the relative abundance of long and  
324 short linker transcript variants in the embryo, second and third instar discs (Figure 4  
325 D and H). We found that the concentration of the long linker variant decreased,  
326 whereas the concentration of the short linker variant increased over time in  
327 development, in line with previous observations (Stroeher et al., 1988). As

328 hypothesized, this finding suggested that relative transcript variant abundance may  
329 underlie the switch between auto-activation and auto-repression (without excluding  
330 additional mechanisms).

331 Relative changes in Antp transcript variant concentration (Figure 4 D and H),  
332 differential efficiency of their encoding isoforms to repress or activate the *Antp* gene  
333 (Figure 4 B-D and F-H), the developmental switch of the *Antp* gene from auto-  
334 activation to repression (Figure 3) and the different mobilities of Antp between  
335 second and third instar imaginal discs (Figure 3 E) all pointed towards the hypothesis  
336 that the two isoforms have different properties in their modes of interaction with  
337 chromatin. To investigate this, we expressed the two isoforms in third instar wing and  
338 antennal discs from the *69B* enhancer, which we established to result in Antp  
339 concentrations close to (if not below) endogenous levels (Figure 2 – figure  
340 supplement 2 A-J). FCS measurements revealed that the short linker isoform  
341 displayed longer characteristic decay times and higher fraction of DNA-bound  
342 molecules, suggesting stronger and more pronounced binding to chromatin than its  
343 long linker counterpart (Figure 4 D and H and Figure 4 – figure supplement 2 A-B).  
344 With chromatin (and therefore Antp binding sites configuration) being identical  
345 between the two instances (short and long linker isoforms examined in third instar  
346 wing and antennal imaginal discs of the same age), we were able to directly  
347 compare the apparent equilibrium dissociation constants for the two isoforms  
348 (Supplement 3). We found that the affinity of binding to chromatin ( $K_d^{-1}$ ) of the  
349 repressing short linker isoform is at least 2.3 times higher compared to the activating

350 long linker isoform ( $\frac{K_{d, Antp}^{long linker isof.}}{K_{d, Antp}^{short linker isof.}} > 2.3$ ) (Figure 4 D and H and Figure 4 – figure  
351 supplement 2 C-D'). We, additionally, validated the different affinities of short and  
352 long isoforms by gel-shift experiments using different Antp binding sequences and

353 obtained from two- to eightfold higher affinity of the short linker isoform compared to  
354 the long linker isoform in binding of previously characterized Antp and homeodomain  
355 binding sites (Figure 4 D and H and Figure 4 – figure supplement 3). Collectively, our  
356 experiments support the notion that differences in Antp regulation during disc  
357 development can be largely attributed to differences in the affinity of the investigated  
358 Antp isoforms.

359 Taken together, the switch of Antp from an auto-activating to an auto-  
360 repressing state and the alteration of its DNA-binding behavior during disc  
361 development can be largely explained by a temporal developmental regulation of the  
362 relative concentrations of preferentially auto-activating and auto-repressing Antp  
363 protein isoforms, which themselves display distinct properties in their modes of  
364 interaction with chromatin (Figure 4 E and I).

365

#### 366 Robustness of Antp auto-regulation

367 In order to further substantiate the qualitative model of Antp auto-regulation  
368 suggested by our experimental findings, we developed a mathematical model of  
369 stochastic *Antp* expression. This model tests whether the identified interplay  
370 between positive and negative auto-regulation of Antp through distinct isoforms is  
371 sufficient to explain the increase in protein concentration and decrease in nucleus-to-  
372 nucleus variability from early to late stages. The model consists of a dynamic  
373 promoter, which drives transcription of *Antp* followed by a splicing step, leading to  
374 the expression of either the auto-repressing or the auto-activating isoform of Antp. In  
375 line with our finding that the repressing isoform has higher concentration at later  
376 stages, we assumed that splicing is more likely to generate this isoform than the  
377 activating isoform. The initial imbalance of Antp towards the activating isoform

378 (Figure 4 D and H) is modeled through appropriate initial concentrations of each  
379 isoform.

380 Since Antp copy numbers per nucleus are in the thousands at both early and  
381 late stages, intrinsic noise of gene expression is likely to explain only a certain  
382 portion of the overall variability in Antp concentrations (Elowitz et al., 2002; Taniguchi  
383 et al., 2010). The remaining part (termed extrinsic variability) is due to cell-to-cell  
384 differences in certain factors affecting gene expression such as the ribosomal or ATP  
385 abundances. To check whether extrinsic variability significantly affects Antp  
386 expression, we expressed nuclear RFP constitutively, alongside with endogenous  
387 Antp and measured the abundances of green-labeled Antp and RFP. Since extrinsic  
388 factors are expected to affect both genes in a similar way, one should observe a  
389 correlation between the concentration of nuclear RFP and Antp-eGFP. Our data  
390 showed a statistically significant correlation between RFP and Antp (Figure 5 – figure  
391 supplement 1,  $r = 0.524$  and  $p = 9.77 \cdot 10^{-5}$ ). Correspondingly, we accounted for  
392 extrinsic variability also in our model by allowing gene expression rates to randomly  
393 vary between cells (Zechner et al., 2012).

394 The promoter itself is modeled as a Markov chain with three distinct  
395 transcriptional states. In the absence of Antp, the promoter is inactive and  
396 transcription cannot take place (state “U” in Figure 5 A). From there, the promoter  
397 can switch into a highly expressing state “A” at a rate that is assumed to be  
398 proportional to the concentration of the long-linker, auto-activating isoform. This  
399 resembles the positive auto-regulatory function of Antp. Conversely, the promoter  
400 can be repressed by recruitment of the short-linker, auto-repressing isoform,  
401 corresponding to state “R” in the model (Figure 5 A). To account for potential  
402 leakiness of the promoter, this rate is not assumed to be zero, but significantly lower

403 than that of state “A”. Since the auto-repressing isoform of *Antp* can also activate the  
404 promoter, albeit significantly weaker than the auto-activating isoform, and vice versa,  
405 we allow the promoter to switch between states “A” and “R”.

406 While this promoter model resembles the dual-feedback structure of *Antp*  
407 locus inferred from experiments, it is unclear whether the two isoforms compete for  
408 the same binding sites on the P1 promoter or if auto-repression can take place  
409 regardless of whether an activating isoform is already bound to the promoter. In the  
410 former case, an increase in concentration of repressing *Antp* species enhances the  
411 probability to reach state “R” only if the promoter is in state “U” (Figure 5 B and B’).  
412 In the latter case, also the rate of switching between “A” and “R” depends on the  
413 concentration of repressing isoforms of *Antp* (Figure 5 A-A’). We analyzed both  
414 model variants by forward simulation and found that both of them can explain the  
415 increase in average *Antp* concentration between early and late stages (Figure 5 A’  
416 and B’), as well as the relative fraction of repressing and activating isoforms (Figure  
417 5 D and D’). However, only the non-competitive binding model (Figure 5 A) can  
418 explain the substantial reduction of total *Antp* variability between early and late  
419 stages (Figure 5 A’), whereas in the competitive model variability is not reduced  
420 (Figure 5 B’). We additionally established that the negative feedback is required for  
421 suppression of variability (Figure 5 C-C’), since without this, no suppression of  
422 variability is conferred (Figure 5 C’). Thus, our model suggested that auto-repression  
423 is required and it is possible also if an activating isoform of *Antp* is already bound to  
424 the P1 promoter. Correspondingly, we use the non-competitive promoter model for  
425 further analyses.

426 To further validate our model, we first examined its predictions on variability  
427 by comparing the variability values predicted by the model to the ones generated by

428 our experimental measurements. Next to the  $CV^2$ , the Fano factor (expressed as the  
429 variance over the mean,  $FF = \frac{s^2}{m}$ , in concentration units) is another commonly used  
430 index to quantify variability in biological systems. Fano factor values that increase  
431 with average concentrations indicate that the underlying transcriptional processes  
432 cannot be sufficiently explained by a simple one-step promoter configuration with  
433 purely intrinsic Poissonian noise and that extrinsic noise is likely to contribute  
434 significantly to the overall variability (Newman et al., 2006; Schwanhausser et al.,  
435 2011; Taniguchi et al., 2010). Our model predicted a decrease in variability as a  
436 function of total Antp concentration and an increase in the Fano factor. These  
437 findings are in good agreement with our experimental data (compare Figure 5 E to E'  
438 and F to F').

439 We next analyzed the model behavior under different genetic perturbations.  
440 We found that overexpression of both auto-activating and auto-repressing isoforms  
441 leads to an increase of the total Antp concentration (Figure 5 G' and H'), but there is  
442 no negative effect on the noise suppressing property of the circuit (Figure 5 G and  
443 H). In fact, the variability is even further decreased, which can be explained by the  
444 characteristic inverse relation between intrinsic noise and average concentration  
445 (Paulsson, 2004). In line with this prediction, flies expressing roughly eightfold  
446 concentration of either SynthAntp auto-activating or auto-repressing isoform in distal  
447 appendages (Figure 5 I and J, Figure 2 – figure supplement 2 A and I) or the notum  
448 (Figure 5 K and Figure 5 – figure supplement 2 A and A') displayed the wild type  
449 morphology, indicative of normal Antp function.

450 However, overexpression of an exogenous repressor, such as Sex combs  
451 reduced (Scr), which can only repress Antp at the transcriptional level, but can  
452 neither activate it nor activate its own transcription (Figure 5 – figure supplement 2 B-

453 G'), was predicted by the model to block transcription almost entirely and to have  
454 correspondingly severe effects on Antp dynamics (Figure 5 – figure L and L'),  
455 leading to high variability even at late stages and to very low expression levels. As  
456 expected, flies overexpressing SynthScr in the distal appendages or the notum,  
457 displayed severe malformations of both leg and notum development (Figure 5 M-O).

458 Taken together, the minimal model of Antp auto-regulatory genetic circuit is  
459 able to explain the experimentally observed differences in Antp concentration and  
460 cell-to-cell variability at early and late developmental stages.

461

## 462 **Discussion**

463 In this work, we have characterized the endogenous molecular numbers  
464 (concentration) and cell-to-cell variability in concentration of 14 TFs in *Drosophila*  
465 imaginal discs by FCS. We have identified Antp as a TF displaying, for its high  
466 average concentrations, considerably lower variability among cells. We used a  
467 combination of genetics, FCS and mathematical modeling to quantitatively  
468 characterize Antp behavior in live imaginal discs and identified a kinetic mechanism  
469 responsible for the suppression of variability in third instar discs compared to earlier  
470 developmental stages. We found that *Antp* can auto-regulate its expression levels  
471 during the course of development, starting from a preferentially auto-activating state  
472 early in development and transitioning to a preferentially auto-repressing state later.  
473 The early state is characterized by lower average Antp concentrations and high  
474 variability, whereas the opposite is true for the later repressing state. Without  
475 excluding other mechanisms, such as chromatin configuration and accessibility of  
476 Hox binding sites to Antp, we showed that differential expression of Antp isoforms is  
477 one contributing mechanism for the observed regulatory switch. These isoforms

478 have preferentially activating or repressing activities on the *Antp* promoter, bind  
479 chromatin with different affinities and are themselves expressed in different relative  
480 amounts during development. Finally, based on this data, we have derived a simple  
481 kinetic model of *Antp* auto-regulation and confirmed its predictions by introducing  
482 genetic perturbations.

483 Negative auto-regulation has been identified as a frequently deployed  
484 mechanism for the reduction of noise (cell-to-cell variability) and the increase of  
485 regulatory robustness in various systems (Becskei and Serrano, 2000; Dublanche et  
486 al., 2006; Gronlund et al., 2013; Nevozhay et al., 2009; Shimoga et al., 2013; Thattai  
487 and van Oudenaarden, 2001). Auto-repression has been described for the Hox gene  
488 *Ultrabithorax (Ubx)* in haltere specification and as a mechanism of controlling Ubx  
489 levels against genetic variation (Crickmore et al., 2009; Garaulet et al., 2008), as well  
490 as in *Ubx* promoter regulation in *Drosophila* S2 cells (Krasnow et al., 1989). In  
491 contrast, an auto-activating mechanism is responsible for the maintenance of  
492 *Deformed* expression in the embryo (Kuziora and McGinnis, 1988). Moreover, global  
493 auto-regulation of *Hox* gene complexes has been shown to be in effect also in  
494 mammalian limb development (Sheth et al., 2014). These experiments point to  
495 evolutionarily conserved mechanisms for establishing (auto-activation) or limiting  
496 (auto-repression) Hox TF levels and variability in different developmental contexts.

497 Our data suggest that the developmental switch from auto-activation to auto-  
498 repression is, at least in part, mediated by molecularly distinct *Antp* linker isoforms.  
499 Differences in affinities of different Hox TF isoforms, based on their linker between  
500 the YPWM motif and the homeodomain, have also been identified for the Hox TF  
501 *Ubx*. Interestingly, its linker is also subject to alternative splicing at the RNA level  
502 (Reed et al., 2010). In a similar way to *Antp*, the long linker *Ubx* isoform displays 4-



503 5fold lower affinity of DNA binding, as compared to short linker isoforms, and the two  
504 isoforms are not functionally interchangeable in *in vivo* assays. Finally, the Ubx linker  
505 also affects the strength of its interaction with the Hox cofactor Extradenticle (Exd),  
506 underscoring the functional importance of linker length in Hox TF function (Saadaoui  
507 et al., 2011). Thus, protein isoform control might represent a common regulatory  
508 mechanism of Hox-mediated transcriptional regulation.

509 Our model predicted that the Antp auto-regulatory circuit is robust with respect  
510 to initial conditions and extrinsic noise by being able to suppress cell-to-cell  
511 concentration variability even at very high concentrations of the auto-repressing or  
512 the auto-activating Antp isoform. This “buffering” capacity on cell-to-cell variability is  
513 reflected in the ability of flies to tolerate up to 7-fold overexpression of Antp without  
514 exhibiting abnormal phenotypes. Therefore, two different isoforms produced from the  
515 same gene with opposing roles in transcriptional regulation and different auto-  
516 regulatory binding sites on the gene’s promoter seem to suffice to create a robust  
517 gene expression circuit that is able to “buffer” perturbations of the starting conditions.  
518 So far, we have only been able to indiscriminately increase or decrease Antp  
519 concentration at the tissue level and record the phenotypic outcome of these  
520 perturbations. It will be interesting to test whether controlled perturbations of TF  
521 variability at the tissue level (making TF concentration patterns less or more noisy  
522 among neighboring cells) lead to abnormal phenotypes, however the technology for  
523 such manipulation is currently not readily accessible in flies.

524 While our study has focused on the quantitative analysis of the influence of  
525 Antp on its own expression, it may also have important implications for the regulation  
526 of Antp target genes. In particular, the repression and activation of genes through  
527 different isoforms of the same TF represents a plausible design principle to achieve

528 differential expression of target genes. This could be achieved either through  
529 temporal developmental control of isoform abundance, or by spatial control, for  
530 example through the formation of different nuclear microenvironments.

531 In the case of temporal control, since target genes harbor different amounts of  
532 binding sites for activating and repressing isoforms, transcriptional programs of cells  
533 could be easily switched by changes in relative concentration of TF isoforms. In the  
534 case of Antp, for instance, targets that allow binding of only the short-linker,  
535 repressing isoform, could be highly expressed initially, but expression would be shut  
536 down at later stages as soon as this isoform becomes dominant. Conversely, the  
537 opposite behavior would be observed for targets featuring binding sites for only the  
538 activating isoform. We previously established that Antp target genes are activated or  
539 repressed with different efficiencies by Antp isoforms (Papadopoulos et al., 2011).  
540 Such a mechanism would allow distinct sets of target genes to be differentially  
541 regulated by the same Hox TF at different developmental stages. Evidence from  
542 genome-wide investigation of Hox target sites in the wing disc during development  
543 (third instar larval, prepupal and pupal wing discs) has shown that target gene  
544 batteries change dramatically in development (Pavlopoulos and Akam, 2011).

545 In the case of spatial control, enhancer binding sites of similar affinity could  
546 cluster in topologically distinct regions in the nucleus, according to the highest  
547 concentrations of either the preferentially activating or the repressing Antp isoform,  
548 thus creating microenvironments, capable of favoring transcriptional activation or  
549 repression. In this case, developmental control of the abundances of these two  
550 isoforms would change the efficiencies of activation and repression of their targets  
551 by enrichment or shrinkage of the microenvironments and/or departure/arrival of  
552 enhancers to pre-existing microenvironments. We have already observed that Antp

553 nuclear distribution is not even, but features sites of accumulation (Figure 5 – figure  
554 supplement 1 B). While this scenario remains to be examined in detail for Antp,  
555 recent work on the Ubx-dependent expression of the *shavenbaby* (*svb*) gene  
556 identified that this mechanism of generation of functionally distinct nuclear  
557 microenvironments not only exists, but also allows robust expression of the *svb* locus  
558 from low-affinity enhancers (Crocker et al., 2015; Crocker et al., 2016; Crocker et al.,  
559 2017).

560 In general, while this work has increased our understanding of how  
561 developmentally important TFs secure their own regulatory robustness, it will be  
562 interesting to investigate whether the design principles of auto-regulatory circuits  
563 extend also to target genes.

564

## 565 **Figure legends**

566 **Figure 1: Study of concentration, DNA-binding dynamics and cell-to-cell**  
567 **protein concentration variability of 14 Drosophila TFs in imaginal discs. (A-H)**

568 Workflow of the study of TF concentration, mobility/DNA-binding and nucleus-to-  
569 nucleus variability of TFs in imaginal discs by FCS. Live imaging of imaginal discs,  
570 expressing endogenously-tagged TFs, visualized by fluorescence microscopy and  
571 neighboring cells, expressing TFs at different levels, selected for FCS  
572 measurements (A-B). FCS measurements are performed by placing the focal point  
573 of the laser light into the nucleus (C-D) and recording fluorescence intensity  
574 fluctuations (E), generated by the increase or decrease of the fluorescence intensity,  
575 caused by the arrival or departure of fast- and slowly-diffusing TF molecules into or  
576 out of the confocal detection volume (D). The recorded fluctuations are subjected to  
577 temporal autocorrelation analysis, which generates temporal autocorrelation curves

578 (henceforth referred to as FCS curves), which by fitting with an appropriate model  
579 (Supplement 1), yield information about the absolute concentration of fluorescent  
580 molecules (F) and, after normalization to the same amplitude, their corresponding  
581 diffusion times, as well as the fraction of fast- and slowly-diffusing TF molecules (G).  
582 The concentration of molecules is inversely proportional to the y-axis amplitude at  
583 the origin of the FCS curve (F). Processes that slow down the diffusion of TF  
584 molecules, such as binding to very large molecules (e.g. chromosomal DNA), are  
585 visible by a shift of the FCS curves to longer characteristic times (G). Measurements  
586 in a collection of neighboring cell nuclei also allow the calculation of protein  
587 concentration variability at the live tissue level (H). (I) Representative average FCS  
588 measurements of eight TFs, selected to demonstrate the full span of the  
589 concentration range observed. (J) FCS curves shown in (I), normalized to the same  
590 amplitude,  $G_n(\tau) = 1$  at  $\tau = 10 \mu s$ , show the shift of the characteristic decay times to  
591 higher values and the increase of the relative amplitude of the slow component,  
592 indicating slower diffusion and/or higher degree of TF binding to the DNA. (K)  
593 Variability of the 14 TFs as a function of concentration. Antp in the wing, but even  
594 more in the leg, disc displays markedly lower variability for its average  
595 concentrations. (L) Variability in concentration of endogenous Antp in the wing disc,  
596 observed among clusters of neighboring cells, each displaying a different average  
597 concentration. (M) Variability of Antp concentration in clusters of neighboring cell  
598 nuclei (plotted as a function of its average concentrations), decreases as the  
599 average Antp concentration in the cluster increases, i.e. low average concentration  
600 clusters are associated with high variability, whereas high average concentration  
601 clusters exhibit low variability. Error bars in (K) and (N) represent 1 standard  
602 deviation of average TF concentration.

603

604 Figure 1 – figure supplement 1: Measurement of average concentrations and  
605 **nucleus-to-nucleus variability of 14 endogenously-tagged TFs in *Drosophila***  
606 **imaginal discs by FCS.** (A-P) Fluorescence imaging of TFs, showing their  
607 expression pattern in imaginal discs and the salivary gland. White arrows indicate  
608 regions where FCS measurements of endogenous intra-nuclear concentration were  
609 performed and the average concentrations are given for each TF. Images have been  
610 contrasted for visualization purposes. For the Antp and Grn TFs, both leg and wing  
611 imaginal discs have been used for measurements. Average concentrations of TFs  
612 measured in different cells span a range of two orders of magnitude, from few tens to  
613 a thousand nanomolar. Scale bars denote  $100\ \mu m$ , unless otherwise indicated. (Q)  
614 Characterization of nucleus-to-nucleus variability among neighboring cells within the  
615 same expression domain in imaginal discs of the 14 TF studied by FCS. Black bars  
616 show concentration averages (with error bars representing 1 standard deviation),  
617 whereas grey bars show the variability, i.e. the squared coefficient of variability  
618 (expressed as the variance over the squared mean,  $CV^2 = \frac{s^2}{m^2}$ ). TFs have been  
619 sorted according to increasing variability.

620

621 Figure 1 – figure supplement 2: Characteristic decay times of Antp-eGFP do not  
622 **change as a function of total concentration.** (A-B) Characteristic decay times  $\tau_{D_1}$   
623 (A) and  $\tau_{D_2}$  (B) do not vary with the concentration of Antp-eGFP TF molecules, as  
624 evident from  $\tau_{D_1} = f(N_1)$  and  $\tau_{D_2} = f(N_2)$ , where  $N_1$  is the number of freely  
625 diffusing,  $N_2$  the number of bound Antp-eGFP TF molecules and  $\tau_{D_1}$ ,  $\tau_{D_2}$  their  
626 respective diffusion times.

627

628 **Figure 2: Antp is able to repress and activate its own expression at the**  
629 **transcriptional level.** (A) Schematic representation of the wing disc showing the  
630 region of highest Antp expression (green cells). Antp is highly expressed in the wing  
631 disc in the regions of the notum that correspond to the structure of the prescutum in  
632 the adult cuticle, as well as in the base of the wing blade, which gives rise to the  
633 mesopleura and pteropleura of the adult thoracic cuticle. The black rectangle  
634 indicates the approximate region where the clonal analysis has been performed in  
635 (B-C'). (B-B') Clonal overexpression of a *SynthAntp-eGFP* construct (green) in the  
636 wing disc represses the endogenous Antp protein (magenta). The region enclosed  
637 by a dashed line in (B) shows a clone induced in the notum within the *Antp*  
638 expression domain. (C-C') Auto-repression of Antp occurs at the transcriptional level.  
639 Induction of *SynthAntp-eGFP*-overexpressing clones, while monitoring *Antp*  
640 transcription by the *Antp* P1-*lacZ* reporter. Dashed lines indicate clones within the  
641 *Antp* P1 reporter expression domain that express *SynthAntp-eGFP* and down-  
642 regulate *Antp* P1-*lacZ*. (D) Schematic representation of Antp repressive function on  
643 its own transcription. (E) Schematic representation of the wing disc. The black  
644 rectangle indicates the approximate region of ectopic Antp P1 reporter expression in  
645 (F-F'). (F-F') Expression of *SynthAntp-eGFP* by *Dll-Gal4* (MD23) results in ectopic  
646 activation of *Antp* P1-*lacZ* in distal compartments of the wing disc. Note the  
647 endogenous and ectopic expression pattern of the reporter in (F), indicated by white  
648 arrows. (G) Schematic representation of Antp activating function on its own  
649 transcription. Scale bars denote 100  $\mu m$ .

650

651 **Figure 2 – figure supplement 1: Antp is able to repress and activate itself at the**  
652 **transcriptional level – controls.** (A-C') Normal expression patterns of the Antp P1

653 (A-A') and P2 (B-B') transcriptional reporters and Antp protein immunohistochemistry  
654 (C-C'). Boxed areas in (A), (B) and (C) are magnified in (A'), (B') and (C'). The Antp  
655 P1 reporter is highly expressed in the prescutum region of the notum (A') and the  
656 peripodial cells at the base of the wing blade (giving rise to the mesopleura and  
657 pteropleura of the thorax, white arrows in (A)), which overlaps with the Antp protein  
658 pattern ((C') and arrows in (C)). The Antp P2 promoter reporter construct exhibits  
659 very weak, if any, expression at these two domains (B-B'). (D-E') Negative controls  
660 of Antp protein (D-D') and P1 reporter transcription (E-E') upon overexpression of  
661 eGFP. Dashed lines outline the regions of clonal induction in (D) and (E), where  
662 neither the Antp protein (D) nor the Antp P1 reporter (E) are repressed. (F-F')  
663 Repression of Antp P1 reporter transcription upon clonal overexpression of the full-  
664 length untagged Antp protein (Antp-FL). The ectopic expression domain is outlined  
665 by white dashed lines in (F) and marked by the expression of eGFP (F'). (G-G')  
666 Activation of Antp P1 reporter transcription upon ectopic expression of untagged  
667 Antp full-length (Antp-FL) with *Dll* (MD23) driver in the distal region of wing pouch.  
668 The ectopic expression domain is outlined by a yellow dashed line in (G) and is  
669 marked by the expression of nuclear mRFP1. (H-H') Negative control of ectopic  
670 activation of Antp P1 transcription upon overexpression of nuclear mRFP1 alone by  
671 *Dll* (MD23)-Gal4. Scale bars denote 100  $\mu m$ .

672

673 Figure 2 – figure supplement 2: Direct correlation between Antp concentration  
674 **and homeotic function – Antp auto-repression and activation occurs at**  
675 **endogenous concentrations.** (A-D) Live imaging (one optical section) of  
676 SynthAntp-eGFP expressed in the distal antennal portion of the eye-antennal disc by  
677 different Gal4 drivers. The concentration was measured using FCS and average

678 concentrations are indicated. An eightfold difference was observed between the  
679 strong *Dll*-Gal4 driver (MD23) (A) and weak *69B*-Gal4 driver (D). (E-H)  
680 Transformations of the distal antenna into a tarsus in adult flies, caused by  
681 *SynthAntp-eGFP* overexpression in antennal discs (A-D). The strength of the  
682 transformation correlates with the level of expression from the different Gal4 drivers.  
683 Ectopic tarsi range from complete transformation to milder transformations of the  
684 arista or ectopic leg bristles in the third antennal segment in (G) and (H), indicated by  
685 black arrows. (I) Average FCS measurements performed in nuclei overexpressing  
686 *SynthAntp-eGFP*, using different Gal4 drivers. Note that the y-axis amplitudes at the  
687 origin of the FCS curves are inversely proportional to the concentration. (J) FCS  
688 curves of measurements in (I) normalized to the same amplitude,  $G_n(\tau) = 1$  at  
689  $\tau = 10 \mu s$ , show major overlap, indicating indistinguishable behavior of Antp binding  
690 to chromatin across the concentration range examined (0.5 – 3.8 nM). (K-P) Antp  
691 auto-regulation occurs at endogenous concentrations. (K-L) Repression of  
692 endogenous Antp protein upon induction of *SynthAntp-eGFP* in the proximal regions  
693 of the wing disc by *69B*-Gal4, which results in Antp expression very similar to  
694 endogenous levels. (M-N) No repression is observed upon overexpression of *eGFP*  
695 (negative control), as indicated by white arrows in (M). White arrows in (K) and (M)  
696 point to the equivalent area in the wing disc, where Antp repression is observed. (O)  
697 X-gal stainings of the *Antp* P1 reporter show weak but detectable ectopic  $\beta$ -  
698 galactosidase activity in the antennal disc (black arrows). (P) Negative control  
699 stainings of *eGFP* induced by the *69B* enhancer show complete absence of ectopic  
700 reporter transcription. Scale bars denote 100  $\mu m$ , unless otherwise indicated.  
701



702 Figure 2 – figure supplement 3: Comparison of endogenous and overexpressed  
703 **Antp by FCS.** (A) FCS curves of Antp-eGFP in wing disc nuclei. Concentration  
704 differences of fluorescent Antp protein are obvious among cells expressing one or  
705 two copies of Antp-eGFP (homozygous and heterozygous larvae) or overexpressing  
706 SynthAntp-eGFP from the *Dll* MD23)-Gal4 driver. (B) FCS curves shown in (A)  
707 normalized to the same amplitude,  $G_n(\tau) = 1$  at  $\tau = 10 \mu\text{s}$ , show pronounced  
708 overlap between homozygous and heterozygous *Antp-eGFP*-expressing cells, as  
709 well as between endogenously expressed *Antp* and overexpressed *SynthAntp-*  
710 *eGFP*, indicating similar diffusion times and modes of interaction with chromatin.  
711 FCS curves are color-coded as outlined in panel (B).

712

713 Figure 3: Antp is necessary and sufficient to trigger a developmental switch  
714 **from transcriptional auto-activation to auto-repression.** (A and F) Schematic  
715 representations of the experimental setup. Clones were induced at 26 h (early  
716 clones) or 60 h (late clones). The analysis was performed at third instar larval stage  
717 (~96-120 h of development). Black rectangles enclose the blown up regions of  
718 interest in the corresponding data panels. (B-B') Early-induced clones, expressing  
719 full-length, untagged *Antp*, marked by the absence of mCherry, reveal strong auto-  
720 activation of Antp-eGFP (dashed lines in (B)), monitored by the endogenous Antp-  
721 eGFP protein. The cyan line in (B) outlines the region of highest endogenous Antp  
722 expression. Note the absence of repression of the endogenous gene in  
723 overexpression clones within this region at this stage. The whole *Antp* expression  
724 domain expresses *Antp-eGFP*, but overexpression clones (sub-regions marked by  
725 absence of mCherry staining) express *Antp-eGFP* much stronger (B'). (C-C') Antp is  
726 required for sustaining its own expression by auto-activation. Induction of *RNAi*

727 knockdown clones of *Antp* at 26 h of development (early clonal induction, dashed  
728 line in (C)) results in cells with pronounced reduction in *Antp* P1 reporter expression.  
729 Knockdown clones have been marked by nuclear mRFP1 in (C'). (D) Updated *Antp*  
730 auto-activation model showing the pronounced auto-activating capacity of *Antp* at  
731 early stages, without excluding concurrent weak auto-repression. (E) Study of  
732 concentration, DNA-binding and nucleus-to-nucleus variability by FCS at second  
733 instar leg and wing discs (derived by the FCS analysis in Figure 3 – figure  
734 supplement 3). Low concentration, short decay times (indicative of low degree of  
735 DNA-binding) and high variability were observed in second instar wing and leg discs.  
736 Reciprocally, high concentration, long decay times (indicative of pronounced  
737 chromatin binding) and low variability were observed in third instar wing and leg  
738 discs. Statistical significance was determined using a two-tailed Student's T-test (\*\*\*,  
739  $p < 0.001$  and \*,  $p < 0.05$ , namely  $p_{concentration}^{2nd\ vs\ 3rd\ instar} = 2.04 \cdot 10^{-20}$ ,  $p_{\tau D2}^{2nd\ vs\ 3rd\ instar} =$   
740  $7.2 \cdot 10^{-4}$  and  $p_{variation}^{2nd\ vs\ 3rd\ instar} = 3.4 \cdot 10^{-2}$ ). (G-G') Late-induced clones, expressing  
741 full-length, untagged *Antp*, marked by the absence of mCherry, reveal strong auto-  
742 repression of *Antp*-eGFP (dashed lines in (G)), monitored by the endogenous *Antp*-  
743 eGFP protein. The cyan lines in (G) outline the region of strong endogenous  
744 expression. (H-H') Late induction of *Antp* knockdown clones by *RNAi* (60 h of  
745 development) within its normal expression domain results in upregulation of the *Antp*  
746 P1 reporter above endogenous levels (dashed line in (H)). The cyan line in (H)  
747 outlines the region of strong endogenous expression of the P1 reporter. Cytoplasmic  
748 eGFP marks the clone of *Antp* knockdown by *RNAi* (H'). (I) Updated *Antp* auto-  
749 repression model showing the pronounced auto-repressing capacity of *Antp* at late  
750 stages, without excluding concurrent weak auto-activation.

751

752 Figure 3 – figure supplement 1: **Antp expression patterns are not altered by the**  
753 **MiMIC MI02272 insertion.** (A) Schematic representation of the Antp-eGFP fusion  
754 protein produced by the conversion of the MiMIC MI02272 construct to an artificial  
755 exon. The eGFP-encoding artificial exon is situated in intron 6 of the mRNA and is  
756 spliced in between exons 6 and 7 that correspond to the long and non-conserved N-  
757 terminal coding sequence of the protein, which has little (if any) function *in vivo*  
758 (Papadopoulos et al., 2011), and does not disrupt the homeodomain or YPWM motif.  
759 All features have been drawn to scale. (B) Heterozygous flies (embryos and third  
760 instar larvae), examined for their Antp-eGFP pattern (detected by an antibody to  
761 GFP, green), as compared to the total amount of Antp (expressed by the sum of the  
762 MiMIC *Antp-eGFP* and the wild type *Antp* loci), detected by an Antp antibody  
763 (magenta). Comparisons of the Antp pattern in wild type embryos and all thoracic  
764 imaginal discs are provided case-wise in the right panel. In discs, dashed lines  
765 approximately separate the anterior (indicated by “A”) from the posterior (indicated  
766 by “P”) domain of the disc. Note the high expression of Antp in the humeral disc. In  
767 the leg discs, Antp is expressed most strongly in the posterior compartment of the  
768 prothoracic leg disc, the anterior compartment of the mesothoracic leg disc and in an  
769 abundant pattern in the metathoracic leg disc. Cyan arrows point to Antp positive  
770 cells in the second and third leg discs that are centrally located, as previously shown  
771 (Engstrom et al., 1992). All images represent Z-projections. Scale bars denote  
772 100  $\mu m$ .

773

774 Figure 3 – figure supplement 2: **Antp is sufficient and required to trigger a**  
775 **developmental switch from transcriptional auto-activation to auto-repression –**  
776 **controls.** (A-C’) Negative controls of Antp clonal auto-activation and repression

777 using early and late clone induction regimes. (A-A') Without induction of clones  
778 expressing full-length untagged Antp, no repression or activation of endogenous  
779 Antp protein is observed. (B-C') Upon induction of non-overexpressing clones  
780 (clones expressing only Gal4, without a UAS transgene), no activation or repression  
781 of Antp protein is observed at early or late induction time points. White dashed lines  
782 in (B) and (C) outline the induced clones, marked by the absence of mCherry. (D-E')  
783 Early ectopic induction of either Antp full-length untagged protein (D-D') or  
784 SynthAntp (E-E') result in upregulation of the Antp P1 reporter. Yellow dashed lines  
785 in (D) and arrows in (E) point to the induced clones and cyan continuous lines show  
786 the regions of high endogenous expression of the reporter. Clones have been  
787 marked by cytoplasmic eGFP. (F-G') Negative controls of early clonal induction of  
788 eGFP alone (without concurrent induction of Antp) show no repression of the Antp  
789 protein (F-F') or the P1 reporter (G-G'). Dashed lines in (G) mark the clones of eGFP  
790 induction. (H-H') Positive control of clonal knockdown of the Antp *RNAi* line used in  
791 Figure 3. Clonal knockdown by *RNAi* (indicated by the dashed line in (H) and marked  
792 by nuclear mRFP1 in (H')) resulted in efficient downregulation of the endogenous  
793 Antp protein. Scale bars denote 100  $\mu m$ , unless otherwise indicated.

794

795 **Figure 3 – figure supplement 3: Antp concentration and cell-to-cell variability in**  
796 **second and third instar wing and leg imaginal discs (A-A'')** Representative FCS  
797 curves recorded in second and third instar wing and leg imaginal discs, expressing  
798 *Antp-eGFP*. Note the low concentration in second instar leg and wing discs, reflected  
799 by the relatively high amplitude of the FCS curves (inversely proportional to  
800 concentration) in (A), as compared to the high concentration in third instar discs in  
801 (A'). (B) FCS curves shown in (A) and (A'), normalized to the same amplitude,

802  $G_n(\tau) = 1$  at  $\tau = 10 \mu s$ , show a shift towards longer decay times in the third instar  
803 leg and wing discs, indicative of pronounced interactions of Antp with chromatin.  
804 FCS curves are color-coded as outlined in panel (A). (C) Quantification of average  
805 concentrations and cell-to-cell variability in protein concentration among neighboring  
806 nuclei in wing and leg, second and third instar, discs. Black bars denote the average  
807 concentration and grey bars denote the variability, expressed as the variance over  
808 the squared mean. Note the increase in average concentration from second to third  
809 instar (eleven-fold increase in the leg disc) and the concurrent drop in variability to  
810 almost half of its value. Statistical significance was determined using Student's two-  
811 tailed T-test (\*\*\*,  $p < 0.001$ , namely  $p_{3rd-2nd\ instar\ leg} = 4.4 \cdot 10^{-18}$  and  
812  $p_{3rd-2nd\ instar\ wing} = 3.2 \cdot 10^{-8}$ ).

813

814 **Figure 4: Developmental control of Antp auto-activation and auto-repression**  
815 **relies on the relative concentrations of preferentially activating and repressing**  
816 **Antp isoforms, which display different binding affinities to chromatin. (A)**

817 Schematic representation of the Antp mRNA, generated from the P1 promoter, with  
818 exons represented by grey boxes, the nucleotide length of which is indicated above  
819 each exon in base pairs (bp). A higher magnification of exons 4-7 (omitting their in-  
820 between splicing points for simplicity) indicates an alternative splice site at the 3' end  
821 of exon 7, which results in an isoform featuring a short linker between the YPWM  
822 motif and the homeodomain (encoded by four amino acids: RSQF, grey box), or a  
823 long linker isoform (encoded by eight amino acids: RSQFGKCQ, white box). All  
824 exons have been drawn to scale. (B-B') *SynthAntp-eGFP* transgenes encoding Antp  
825 isoforms with a long linker were induced from the *ptc* enhancer and endogenous  
826 Antp protein auto-repression was monitored at the proximal portion of the wing disc.

827 A white dashed line outlines the region of auto-repression that was used for  
828 quantification (see Materials and Methods). The long linker isoform (preferentially  
829 auto-activating isoform) acts as a weak repressor of Antp protein, as compared to its  
830 short linker equivalent in (F-F'). (C-C') *SynthAntp-eGFP* transgenes encoding Antp  
831 isoforms with a long linker were induced from the *Dll* (MD23) enhancer and Antp P1  
832 reporter auto-activation was monitored at the distal portion of the wing disc (wing  
833 blade), indicated by a yellow dashed line. The long linker isoform (preferential auto-  
834 activator) induces stronger transcription of the P1 Antp reporter, as compared to its  
835 short linker counterpart in (G-G'). (D) Relative concentration of long linker isoform  
836 (see Materials and Methods); quantification of its auto-activation and auto-repression  
837 capacities (see Materials and Methods); fraction of DNA-bound fluorescent  
838 molecules, measured by FCS (see also Figure 4 – figure supplement 2); and relative  
839 affinity of binding to the DNA (quantified by the calculation of its apparent equilibrium  
840 dissociation constant using both FCS measurements and gel-shifts (EMSA), see  
841 also Figure 4 – figure supplements 2 and 3) are provided for comparison with (H).  
842 (E) Updated qualitative model of the dual auto-regulation of Antp by activating and  
843 repressing Antp isoforms, equivalent to an early developmental stage. The activating  
844 isoform binds with lower affinity to the P1 Antp promoter, but is produced in excess,  
845 relative to the repressing one, resulting in preferential activation of transcription,  
846 without cancelling out partial binding of the auto-repressive isoform as well. (F-F')  
847 Similar to (B-B'), except induction has been with the short linker (preferentially auto-  
848 repressing) isoform. It acts as a stronger repressor of Antp protein, as compared to  
849 its long linker equivalent in (B-B'). (G-G') Similar to (C-C'), except induction has been  
850 with the short linker (preferentially auto-repressing) isoform. It acts as a weaker  
851 activator of Antp P1 transcription, as compared to its long linker equivalent in (C-C').

852 (H) The same parameters as in (D) have been evaluated and are provided for  
853 comparison with (D). Statistical significance was determined using a two-tailed  
854 Student's T-test between measurements performed with the long linker (auto-  
855 activating) isoform in (D) and the short linker (auto-repressing) isoform in (H) (\*\*\*,  
856  $p < 0.001$  and \*,  $p < 0.05$ , namely  $p_{concentration}^{embryo\ long\ vs\ short} = 3.16 \cdot 10^{-5}$ ,  
857  $p_{concentration}^{2nd\ instar\ long\ vs\ short} = 1.16 \cdot 10^{-4}$ ,  $p_{concentration}^{3rd\ instar\ long\ vs\ short} = 2.85 \cdot 10^{-6}$ ,  
858  $p_{relative\ activation}^{long\ vs\ short} = 4.1 \cdot 10^{-3}$ ,  $p_{relative\ repression}^{long\ vs\ short} = 2.4 \cdot 10^{-4}$  and  
859  $p_{DNA-bound\ fraction\ (FCS)}^{long\ vs\ short} = 5.6 \cdot 10^{-10}$ ). (I) Updated qualitative model representation of  
860 Antp repression as in (E), whereby at later stages excess of Antp auto-repressor  
861 accounts for negative feedback on transcriptional regulation of the P1 promoter,  
862 without ruling out partial binding by the activating isoform as well, resulting in partial  
863 activation of transcription, hence expression is maintained.

864

865 **Figure 4 – supplement 1: Developmental control of Antp auto-activation and**  
866 **repression relies on the relative concentrations of preferentially auto-**  
867 **activating and auto-repressing Antp isoforms, which display different binding**  
868 **affinities to chromatin – short linker isoform controls. (A-H')** Experiments of  
869 Figures 2-4, performed with short linker (preferentially auto-repressing) full-length  
870 and SynthAntp isoforms on their capacity to repress and activate Antp P1 reporter  
871 transcription and Antp protein. Dashed lines in all panels outline the clones induced  
872 or the region of ectopic expression using *Dll* (MD23)-Gal4, whereas closed  
873 continuous cyan lines outline the regions of endogenous Antp P1 reporter  
874 expression in (G) and (H). (A-A') Repression of Antp protein by late clonal induction  
875 of SynthAntp in the wing notum. (B-B') Equivalent assay as in (A-A'), but monitoring  
876 auto-repression of the Antp P1 promoter transcription. (C-C') Similar assay to (B-B'),



877 using the full-length Antp protein, induced at the later time point. (D-D') Ectopic  
878 induction of full-length, short linker, untagged Antp cDNA with concurrent labeling of  
879 the expression domain by nuclear mRFP1 results in weak ectopic auto-activation of  
880 the Antp P1 reporter. (E-F') Early and late clonal induction of full-length, short linker,  
881 untagged Antp results in auto-repression (E-E'), or induction (F-F'), of the  
882 endogenous Antp protein, respectively. (G-H') Early clonal induction of SynthAntp  
883 (G-G') or the full-length cDNA (H-H'), both featuring a short linker, triggers ectopic  
884 activation of P1 promoter transcription. (I-J') Antp long (I-I') and short (J-J') linker  
885 isoforms repress Antp at the transcriptional level (monitored by Antp P1 reporter  
886 expression) when induced by *ptc*-Gal4 in the wing disc. Arrows point to the regions  
887 of auto-repressed Antp promoter. Scale bars denote 100  $\mu m$ , unless otherwise  
888 indicated.

889

890 **Figure 4 – figure supplement 2: Comparative binding study of Antp short and**  
891 **long linker isoforms by FCS.** (A-B) FCS analysis performed on third instar wing  
892 and antennal imaginal discs, expressing short or long linker Antp isoforms (tagged to  
893 eGFP) close to endogenous concentrations, from the *69B*-enhancer. Cell nuclei of  
894 similar concentrations in the two datasets have been selected for analysis (A).  
895 Average FCS measurements on the short linker Antp isoform display a consistent  
896 shift towards longer decay times, as compared to its long linker counterpart (B),  
897 indicating higher degree of chromatin binding. (C-D') Binding study of short and long  
898 linker Antp isoforms in third instar wing and antennal discs, expressed by *69B*-Gal4.  
899 The concentration of the Antp short and long linker isoform DNA-bound complexes  
900 (derived by fitting the FCS curves in (A)) is plotted as a function of the total  
901 concentration of Antp-eGFP molecules. From the linear regression equations,



902  $y = 0.34x - 5.31$  (D') and  $y = 0.24x - 3.28$  (E'), the ratio of apparent dissociation  
903 constants for the long and short linker isoforms was calculated to be  $\frac{K_{d, Antp}^{long linker isof.}}{K_{d, Antp}^{short linker isof.}} >$   
904 2.3 (for the calculation refer to Supplement 3). The two dissociation constants differ  
905 at least 2.3 times, indicating stronger binding of the short linker isoform to the DNA,  
906 as compared to the long linker one.

907

908 **Figure 4 – figure supplement 3: In vitro binding study of Antp full-length long**  
909 **and short linker isoforms to Antp and homeodomain binding sites by gel-shift**  
910 **assays.** (A-D) Gel-shift experiments using purified full-length Antp protein, featuring  
911 a long or a short linker, show from twofold (C) to eightfold (A) stronger binding of the  
912 short linker isoform to Antp binding sites. The Antp-DNA complexes and the free  
913 DNA-binding site are shown in (A) and are the same for (B-D). In (C) and (D) an  
914 antibody to Antp has been used in the fifth lane of the serial dilutions of Antp protein  
915 (black asterisks) to indicate specific Antp binding (super-shift). Equal starting  
916 concentrations of purified Antp short and long linker protein have been used and  
917 determined by Western blot. Each successive lane of long or short linker isoform  
918 binding represents a twofold lower concentration of Antp protein. Triangles above the  
919 concentration range of each sample denote declining concentrations and the black  
920 areas therein indicate the corresponding concentration range at which Antp binding  
921 to the probe has been observed.

922

923 **Figure 5: Mathematical model for stochastic Antp expression and system**  
924 **perturbations.** (A-A'') A dynamic promoter, which drives transcription of *Antp*  
925 followed by a splicing step, leads to either the repressing ("R" in (A)) or activating  
926 ("A" in (A)) isoform of Antp. In the absence of Antp, the promoter is inactive and

927 transcription cannot take place (“U” in (A)). This promoter configuration leads to  
928 suppression of variability (A’) and increase in Antp concentration (A’). (B-B’)  
929 Competition of Antp binding, whereby state “A” can be reached only through the  
930 unbound state “U” in (B), results in increase in Antp protein numbers (B’) without  
931 decrease in variability (cyan bar in (B’)). (C-C’) Requirement of the negative  
932 feedback for suppression of variability. In the absence of the state “R” (C),  
933 concentration increases (C’), but variability also increases rather than being  
934 suppressed (cyan bar in (C’)). (D-D’) In all three models (A-A’, B-B’ and C-C’),  
935 changing relative concentrations of repressing and activating Antp isoforms are  
936 predicted, starting with excess of the activating isoform at early stages (D) and  
937 ending with excess of the repressing one at later stages (D’). (E-F’) Model  
938 predictions (E and F) and experimental data validation (E’ and F’) of the decrease of  
939 variability (E) and the increase of the protein Fano factor (F) as a function of  
940 increasing Antp concentrations. (G-K) Perturbations of the model in (A-A’) by  
941 overexpression of Antp long linker (auto-activating) and short linker (auto-repressing)  
942 isoforms. (G-H’) High concentration of both auto-repressing (G-G’) and auto-  
943 activating (H-H’) Antp isoforms result in increase of Antp protein copy numbers in  
944 (G’) and (H’) with concurrent repression of variability in (G) and (H), similar to the  
945 unperturbed system in (A-A’). (I-K) Overexpression of SynthAntp activating or  
946 repressing isoforms by *Dll* (MD23)-Gal4 in distal portion of appendages, such as the  
947 antenna and the leg imaginal discs, result in tarsal transformations in the antenna  
948 (where Antp is normally not expressed (I)), but normal development of tarsi in all legs  
949 (J). These flies are fully viable and can be maintained as a stock. Similarly normal is  
950 the development of the prescutum region of the notum, upon overexpression of  
951 SynthAntp activating or repressing isoforms by *MS243*-Gal4 (K). (L-O) Perturbations

952 of the model system in (A-A'') by overexpression of an exogenous Antp repressor.  
953 As expected, overexpression of the Hox transcription factor Scr, which is able to only  
954 repress, but neither activate Antp expression, nor its own (see Figure 5 – figure  
955 supplement 1 B-E' for details), is predicted to result in drastic reduction of Antp at  
956 later stages (cyan bar in (L')) and have barely any effect in Antp variability at these  
957 stages (L). In this case, ectopic expression of SynthScr by *Dll* (MD23)-Gal4 still  
958 triggers transformation of the antenna, which is devoid of Antp expression, into a  
959 tarsus (M), similar to induction of Antp in this tissue (I), but in overlapping domains  
960 with Antp normal expression, such as the distal leg portion, malformations of the  
961 tarsus and femur are observed (N). Overexpression of SynthScr transgenes by  
962 *MS243*-Gal4 in the fly notum results in severe malformations, indicated by  
963 developmental defects of the adult cuticle (O). Both fly genotypes in (N) and (O) die  
964 as pharate adults.

965

966 Figure 5 – figure supplement 1: Investigation of extrinsic variability in the  
967 **endogenous Antp-eGFP expression domain.** (A-B') Live imaging of a wing disc  
968 notum, where nuclear mRFP1 protein is highly expressed from a constitute enhancer  
969 (*ubi*-mRFP1(NLS)), alongside with endogenous Antp-eGFP. FCS measurements  
970 were performed in the region of high co-expression of Antp and RFP. (B-B') Higher  
971 magnification of cells as in (A-A'). Note the uneven distribution of Antp in the nuclei  
972 and the formation of sites of accumulation in (B). (C) Plot of the concentration of  
973 Antp-eGFP (expressed as number of fluorescent molecules in the Observation  
974 Volume Element (OVE)). The correlation coefficient  $r$  was calculated to be  $r = 0.523$   
975 and the p-value to be  $p_{correlation} = 9.77 \cdot 10^{-5}$ . Scale bars denote  $100 \mu m$ , unless  
976 otherwise indicated.

977

978 Figure 5 – figure supplement 2: Controls of Antp model predictions and Scr-  
979 **mediated perturbations.** (A-A') *MS243*-Gal4-mediated expression of repressing or  
980 activating SynthAntp isoforms results in repression of the Antp endogenous protein  
981 in the notum region of the wing disc. (B-B') Ectopic expression of SynthScr in the  
982 wing disc using *ptc*-Gal4 results in drastic reduction of endogenous Antp protein  
983 levels. (C-C') Ectopic expression of SynthScr by *MS243*-Gal4 in the notum results in  
984 repression of the Antp protein. (D-D') SynthScr represses Antp at the transcriptional  
985 level, as indicated by the absence of transcription of the Antp P1 reporter (white  
986 arrows in (D)). (E-E') Unlike SynthAntp, SynthScr is not able to activate the Antp P1  
987 promoter reporter transcription (E), when induced by *Dll* (MD23)-Gal4. (F-F')  
988 SynthScr is not able to downregulate its own endogenous protein levels upon  
989 overexpression by *Dll* (MD23)-Gal4. Dashed line in (F') outlines the region of high  
990 overlap between the overexpressed SynthScr and endogenous Scr stainings. (G-G')  
991 Negative control staining for the induction of eGFP in the wing disc notum by  
992 *MS243*-Gal4, which fails to repress endogenous Antp protein. Dashed lines in (A),  
993 (B) and (C) outline the regions of ectopic overexpression of SynthAntp or SynthScr,  
994 where endogenous Antp is repressed, whereas the dashed line in (F') outlines the  
995 region of overlap between SynthScr overexpression and endogenous expression of  
996 the Scr protein, where no repression is observed. Scale bars denote 100  $\mu m$ , unless  
997 otherwise indicated.

998

## 999 **Acknowledgements**

1000

1001           We are deeply saddened by the unexpected passing of Prof. Walter J.  
1002 Gehring, at the very inception of this work, when the project was still in the planning  
1003 and preliminary data gathering stage. Prof. Gehring was an extraordinary human  
1004 being and a scientific giant, whose work will continue to educate and inspire  
1005 generations to come. The authors are indebted to Sonal Nagarkar Jaiswal, Paolo  
1006 Mangahas, and Hugo J. Bellen for creating and sharing with us the Antp-eGFP line.  
1007 DKP has been supported by a long-term fellowship from the Swiss National Science  
1008 Foundation (PBBSP-138700) and a long-term fellowship from the Federation of  
1009 European Biochemical Societies (FEBS) at initial stages of this project. VV has been  
1010 supported by the Knut and Alice Wallenberg foundation and Karolinska Institute  
1011 Research Funds. DKP would like to express his gratitude to PT for outstanding  
1012 scientific, and uninterrupted financial, support. DKP is indebted to Markus Burkhardt,  
1013 head of the imaging platform at the Center for Regenerative Therapies Dresden  
1014 (CRTD), for help and discussions regarding FCS experiments in Dresden; Sylke  
1015 Winkler and the DNA sequencing facility of the Max-Planck Institute of Molecular Cell  
1016 Biology and Genetics (MPI-CBG) for providing assistance with Antp transcript variant  
1017 quantification; Aliona Bogdanova and the Protein expression and purification facility  
1018 of the MPI-CBG for purification of the repressing and activating Antp isoforms; as  
1019 well as the Light Microscopy facility of MPI-CBG. DKP is also grateful to KS for  
1020 numerous discussions and support throughout the implementation of this work and  
1021 to Konstantinos Papadopoulos for advice on the mathematical analysis of the  
1022 relative binding constants of repressing and activating Antp isoforms. The authors  
1023 would like to acknowledge Jan Brugues and Thomas M. Schultheiss for their critical  
1024 reading and insightful comments on the manuscript.

1025

## 1026 **Materials and Methods**

1027

### 1028 Fly stocks used

1029         The Antp-eGFP MiMIC line has been a kind gift from Hugo J. Bellen. The  
1030 *atonal* (VDRG ID 318959), *brinker* (VDRG ID 318246), *spalt major* (VDRG ID  
1031 318068), *yorkie* (VDRG ID 318237), *senseless* (VDRG ID 318017) and *Sex combs*  
1032 *reduced* (VDRG ID 318441) fosmid lines are available from the Vienna Drosophila  
1033 Resource Center (VDRG) and have been generated recently in our laboratory (Sarov  
1034 et al., 2016). The *fork head* (stock 43951), *grainy head* (stock 42272), *Abdominal B*  
1035 (stock 38625), *eyeless*, (stock 42271), *spineless* (transcript variant A, stock 42289),  
1036 and *grain* (stock 58483) tagged BACs were generated by Rebecca Spokony and  
1037 Kevin P. White and are available at the Bloomington Stock Center. For the *scalloped*  
1038 gene, a GFP-trap line was used (Buszczak et al., 2007), a kind gift from Allan C.  
1039 Spradling laboratory (line CA07575), with which genome-wide chromatin  
1040 immunoprecipitation experiments have been performed (Slattery et al., 2013). For  
1041 the *spineless* gene, Bloomington stock 42676, which tags isoforms C and D of the  
1042 Spineless protein has been also tried in fluorescence imaging and FCS experiments,  
1043 but did not yield detectable fluorescence in the antennal disc, rendering it  
1044 inappropriate to be used in our analysis. Therefore, we resided to stock 42289,  
1045 which tags the A isoform of the protein. For the *eyeless* gene, the  
1046 FlyFos015860(pRedFlp-Hgr)(ey13630::2XTY1-SGFP-V5-preTEV-BLRP-  
1047 3XFLAG)dFRT line (VDRG ID 318018) has been tried also in fluorescence imaging  
1048 and FCS experiments, but did not yield detectable fluorescence in the eye disc for it  
1049 to be used in our analysis. The *act5C-FRT-yellow-FRT-Gal4* (Ay-Gal4) line used for  
1050 clonal overexpression or *RNAi* knockdown has been described (Ito et al., 1997). The

1051 UAS-*Antp* lines (synthetic and full-length), as well as UAS-SynthScr constructs have  
1052 been previously described (Papadopoulos et al., 2011; Papadopoulos et al., 2010).  
1053 The *Dll*-Gal4 (MD23) line has been a kind gift of Ginés Morata (Calleja et al., 1996).  
1054 *69B*-Gal4 and *ptc*-Gal4 have been obtained from the Bloomington Stock Center. The  
1055 *Antp* P1-*lacZ* and P2-*lacZ* have been previously described (Engstrom et al., 1992;  
1056 Zink et al., 1991). The P1 reporter construct spans the region between 9.4 kb  
1057 upstream of the P1 promoter transcription initiation site and 7.8 kb downstream into  
1058 the first intron, including the first exon sequences and thus comprising 17.2 kb of  
1059 *Antp* regulatory sequences (pAPT 1.8). The line used has been an insertion of the  
1060 pAPT 1.8 vector bearing the P1 promoter regulatory sequences upstream of an  
1061 *actin-lacZ* cytoplasmic reporter and has been inserted in cytogenetic location 99F on  
1062 the right chromosomal arm of chromosome 3. The *Antp-RNAi* line has been from  
1063 VDRC, line KK101774. UAS-eGFP stock was a kind gift of Konrad Basler. We are  
1064 indebted to Sebastian Dunst for generating the *ubi-FRT-mCherry(stop)-FRT-*  
1065 *Gal4(VK37)/CyO* line, which drives clonal overexpression upon flippase excision,  
1066 while simultaneously marking cells by the loss of mCherry. For red-color labeling of  
1067 clones the *act5C-FRT-CD2-FRT-Gal4*, UAS-mRFP1(NLS)/TM3 stock 30558 from  
1068 the Bloomington Stock Center has been used. For marking the ectopic expression  
1069 domain of untagged *Antp* proteins the UAS-mRFP1(NLS)/TM3 stock 31417 from the  
1070 Bloomington Stock Center has been used. The *MS243-Gal4*; UAS-GFP/CyO line  
1071 was a kind gift from the laboratory of Ernesto Sánchez-Herrero.

1072

1073 Fly genotypes corresponding to fluorescence images

1074 Figure 1 – figure supplement 1 A: FlyFos018487(pRedFlp-Hgr)(*ato37785::2XTY1-*  
1075 *SGFP-V5-preTEV-BLRP-3XFLAG*)dFRT

1076 Figure 1 – figure supplement 1 B: FlyFos024884(pRedFlp-Hgr)(brk25146::2XTY1-  
1077 SGFP-V5-preTEV-BLRP-3XFLAG)dFRT  
1078 Figure 1 – figure supplement 1 C: FlyFos030836(pRedFlp-Hgr)(salm30926::2XTY1-  
1079 SGFP-V5-preTEV-BLRP-3XFLAG)dFRT  
1080 Figure 1 – figure supplement 1 D: FlyFos029681(pRedFlp-Hgr)(yki19975::2XTY1-  
1081 SGFP-V5-preTEV-BLRP-3XFLAG)dFRT  
1082 Figure 1 – figure supplement 1 E:  $w^{1118}$ ; PBac(fkh-GFP.FPTB)VK00037/SM5  
1083 Figure 1 – figure supplement 1 F: *sd*-eGFP (FlyTrap, homozygous)  
1084 Figure 1 – figure supplement 1 G:  $w^{1118}$ ; PBac(grh-GFP.FPTB)VK00033  
1085 Figure 1 – figure supplement 1 H: FlyFos018974(pRedFlp-Hgr)(Scr19370::2XTY1-  
1086 SGFP-V5-preTEV-BLRP-3XFLAG)dFRT  
1087 Figure 1 – figure supplement 1 I: FlyFos015942(pRedFlp-Hgr)(sens31022::2XTY1-  
1088 SGFP-V5-preTEV-BLRP-3XFLAG)dFRT  
1089 Figure 1 – figure supplement 1 J and K: Antp-eGFP (MiMIC) homozygous (line  
1090 MI02272, converted to an artificial exon)  
1091 Figure 1 – figure supplement 1 L:  $w^{1118}$ ; PBac(Abd-B-EGFP.S)VK00037/SM5  
1092 Figure 1 – figure supplement 1 M:  $w^{1118}$ ; PBac(ey-GFP.FPTB)VK00033  
1093 Figure 1 – figure supplement 1 N:  $w^{1118}$ ; PBac(ss-GFP.A.FPTB)VK00037  
1094 Figure 1 – figure supplement 1 O and P:  $w^{1118}$ ; PBac(grn-GFP.FPTB)VK00037  
1095 Figure 2 B and B': *hs-flp/+*; *act5C-FRT-yellow-FRT-Gal4/+*; UAS-SynthAntp long  
1096 linker-eGFP/+  
1097 Figure 2 C and C': *hs-flp/+*; *act5C-FRT-yellow-FRT-Gal4*, UAS-eGFP/+; UAS-Antp  
1098 long linker (full-length, untagged)/+  
1099 Figure 2 F and F': *Dll-Gal4 (MD23)/+*; UAS-SynthAntp-eGFP/*Antp P1-lacZ*  
1100 Figure 2 – figure supplement 1 A and A': *Antp P1-lacZ/TM3*



1101 Figure 2 – figure supplement 1 B and B': *Antp* P2-*lacZ*/CyO  
1102 Figure 2 – figure supplement 1 C and C': wild type  
1103 Figure 2 – figure supplement 1 D and D': *hs-flp*; *act5C-FRT-yellow-FRT-Gal4*, UAS-  
1104 eGFP  
1105 Figure 2 – figure supplement 1 E and E': *hs-flp/+*; *act5C-FRT-yellow-FRT-Gal4*,  
1106 UAS-eGFP/+; *Antp* P1-*lacZ*/  
1107 Figure 2 – figure supplement 1 F and F': *hs-flp/+*; *act5C-FRT-yellow-FRT-Gal4*, UAS-  
1108 eGFP/+; UAS-*Antp* long linker (full-length, untagged)/*Antp* P1-*lacZ*  
1109 Figure 2 – figure supplement 1 G and G': *Dll-Gal4* (MD23)/+; UAS-*Antp* long linker  
1110 (full-length, untagged), UAS-mRFP1(NLS)/ *Antp* P1-*lacZ*  
1111 Figure 2 – figure supplement 1 H and H': *Dll-Gal4* (MD23)/+; UAS-mRFP1(NLS)/  
1112 *Antp* P1-*lacZ*  
1113 Figure 2 – figure supplement 2 A and E: *Dll-Gal4* (MD23)/+; UAS-SynthAntp long  
1114 linker-eGFP/+  
1115 Fig 2 – figure supplement 2 B and F: *ptc-Gal4/+*; UAS-SynthAntp long linker-eGFP/+  
1116 Figure 2 – figure supplement 2 C and G: *Dll-Gal4* (MD713)/+; UAS-SynthAntp long  
1117 linker-eGFP/+  
1118 Figure 2 – figure supplement 2 D, H and K, L, O: *69B-Gal4*/UAS-SynthAntp long  
1119 linker-eGFP  
1120 Figure 2 – figure supplement 2 M, N and P: *69B-Gal4*/UAS- eGFP  
1121 Figure 3 B, B', G and G': *hs-flp/+*; *ubi-FRT-mChery-FRT-Gal4/+*; *Antp-eGFP*  
1122 (MiMIC)/UAS-*Antp* long linker (full-length, untagged)  
1123 Figure 3 C and C': *hs-flp/+*; UAS-*Antp*<sup>*RNAi*</sup>/+; *Antp* P1-*lacZ*/*act5C-FRT-CD2-FRT-*  
1124 *Gal4*, UAS-mRFP1(NLS)

1125 Figure 3 H and H': *hs-flp/+*; UAS-*Antp<sup>RNAi</sup>*/*act5C-FRT-yellow-FRT-Gal4*, UAS-eGFP;  
1126 *Antp P1-lacZ/+*  
1127 Figure 3 – figure supplement 1 B: *Antp P1-lacZ/TM6B*  
1128 Figure 3 – figure supplement 2 A and A': *hs-flp/+*; *ubi-FRT-mChery-FRT-Gal4/+*;  
1129 *Antp-eGFP (MiMIC)/UAS-Antp long linker (full-length, untagged)*  
1130 Figure 3 – figure supplement 2 B-C': *hs-flp/+*; *ubi-FRT-mChery-FRT-Gal4/+*; *Antp-*  
1131 *eGFP (MiMIC)/+*  
1132 Figure 3 – figure supplement 2 D and D': *hs-flp/+*; *act5C-FRT-yellow-FRT-Gal4*,  
1133 *UAS-eGFP/+*; *Antp P1-lacZ/UAS-Antp long linker (full-length, untagged)*  
1134 Figure 3 – figure supplement 2 E and E': *hs-flp/+*; *act5C-FRT-yellow-FRT-Gal4/+*;  
1135 *UAS-SynthAntp long linker-eGFP/+*  
1136 Figure 3 – figure supplement 2 F and F': *hs-flp/+*; *act5C-FRT-yellow-FRT-Gal4*, UAS-  
1137 *eGFP/+*  
1138 Figure 3 – figure supplement 2 G and G': *hs-flp/+*; *act5C-FRT-yellow-FRT-Gal4*,  
1139 *UAS-eGFP/+*; *Antp P1-lacZ/+*  
1140 Figure 3 – figure supplement 2 H and H': *hs-flp/+*; UAS-*Antp<sup>RNAi</sup>*/*+*; *Antp-eGFP*  
1141 *(MiMIC)/act5C-FRT-CD2-FRT-Gal4*, UAS-*mRFP1(NLS)*  
1142 Figure 4 B and B': *ptc-Gal4/+*; UAS-*SynthAntp long linker-eGFP/+*  
1143 Figure 4 C and C': *Dll-Gal4 (MD23)/+*; UAS-*SynthAntp long linker-eGFP/Antp P1-*  
1144 *lacZ*  
1145 Figure 4 F and F': *ptc-Gal4/+*; UAS-*SynthAntp long linker-eGFP/+*  
1146 Figure 4 G and G': *Dll-Gal4 (MD23)/+*; UAS-*SynthAntp short linker-eGFP/Antp P1-*  
1147 *lacZ*  
1148 Figure 4 – figure supplement 1 A and A': *hs-flp/+*; *act5C-FRT-yellow-FRT-Gal4/+*;  
1149 *UAS-SynthAntp short linker-eGFP/+*

1150 Figure 4 – figure supplement 1 B, B', G and G': *hs-flp/+; act5C-FRT-yellow-FRT-*  
1151 *Gal4/+; UAS-SynthAntp short linker-eGFP/Antp P1-lacZ*

1152 Figure 4 – figure supplement 1 C, C', H and H': *hs-flp/+; act5C-FRT-yellow-FRT-*  
1153 *Gal4/+; UAS-Antp short linker (full-length, untagged)/Antp P1-lacZ*

1154 Figure 4 – figure supplement 1 D and D': *hs-flp/+; Dll-Gal4 (MD23)/+; UAS-Antp*  
1155 *short linker (full-length, untagged), UAS-mRFP1(NLS)/Antp P1-lacZ*

1156 Figure 4 – figure supplement 1 E-F': *hs-flp/+; ubi-FRT-mChery-FRT-Gal4/+; Antp-*  
1157 *eGFP (MiMIC)/UAS-Antp short linker (full-length, untagged)*

1158 Figure 4 – figure supplement 1 I and I': *ptc-Gal4/+; UAS-SynthAntp long linker-*  
1159 *eGFP/Antp P1-lacZ*

1160 Figure 4 – figure supplement 1 J and J': *ptc-Gal4/+; UAS-SynthAntp short linker-*  
1161 *eGFP/Antp P1-lacZ*

1162 Figure 5 I and J: *Dll-Gal4 (MD23)/+; UAS-SynthAntp long linker-eGFP/+ or Dll-Gal4*  
1163 *(MD23)/+; UAS-SynthAntp short linker-eGFP/+*

1164 Figure 5 K: *MS243-Gal4/+; UAS-SynthAntp long linker-eGFP/Dr or MS243-Gal4/+;*  
1165 *UAS-SynthAntp long linker-eGFP/Dr*

1166 Figure 5 M and N: *Dll-Gal4 (MD23)/+; UAS-mCitrine-SynthScr/+*

1167 Figure 5 O: *MS243-Gal4/+; UAS-mCitrine-SynthScr/+*

1168 Figure 5 P: *MS243-Gal4/+; UAS-mCitrine-SynthScr/+*

1169 Figure 5 – figure supplement 1 A-B': *ubi-mRFP1(NLS)/+ or y; Antp-eGFP (MiMIC)/+*

1170 Figure 5 – figure supplement 2 A and A': *MS243-Gal4/+; UAS-SynthAntp long linker-*  
1171 *eGFP/Dr or MS243-Gal4/+; UAS-SynthAntp long linker-eGFP/Dr*

1172 Figure 5 – figure supplement 2 B and B': *ptc-Gal4/+; UAS-mCitrine-SynthScr/+*

1173 Figure 5 – figure supplement 2 C and C': *MS243-Gal4/+; UAS-mCitrine-SynthScr/+*

1174 Figure 5 – figure supplement 2 D and D': *ptc-Gal4/+; UAS-mCitrine-SynthScr/Antp*

1175 *P1-lacZ*

1176 Figure 5 – figure supplement 2 E and E': *Dll-Gal4 (MD23)/+; UAS-mCitrine-*

1177 *SynthScr/Antp P1-lacZ*

1178 Figure 5 – figure supplement 2 F and F': *Dll-Gal4 (MD23)/+; UAS-mCitrine-*

1179 *SynthScr/+*

1180 Figure 5 – figure supplement 2 G and G': *MS243-Gal4/+; UAS-eGFP/+*

1181

### 1182 Preparation of second and third instar imaginal discs for FCS measurements

1183 For FCS measurements, imaginal discs (eye-antennal, wing, leg, humeral and  
1184 genital) and salivary glands were dissected from third instar wandering larvae, or  
1185 wing and leg discs from second instar larvae, in Grace's insect tissue culture  
1186 medium (ThermoFisher Scientific, 11595030) and transferred to 8-well chambered  
1187 coverglass (Nunc® Lab-Tek™, 155411) containing PBS just prior to imaging or FCS  
1188 measurements. Floating imaginal discs or salivary glands were sunk to the bottom of  
1189 the well using forceps.

1190

### 1191 Immunostainings in larval imaginal discs

1192 Larval imaginal discs were stained according to (Papadopoulos et al., 2010).  
1193 Stainings for the endogenous Antp protein have been performed using a mouse anti-  
1194 Antp antibody (Developmental Studies Hybridoma Bank, University of Iowa, anti-  
1195 Antp 4C3) in a dilution of 1:250 for embryos and 1:500 for imaginal discs. eGFP, or  
1196 eGFP-tagged proteins have been stained using mouse or rabbit anti-GFP antibodies  
1197 from ThermoFisher Scientific in a dilution of 1:500 in imaginal discs and 1:250 in  
1198 embryos. mRFP1 was stained using a Chromotek rat anti-RFP antibody. For *Antp*

1199 P1 promoter stainings in imaginal discs we used the mouse anti- $\beta$ -galactosidase 40-  
1200 1a antibody from Developmental Studies Hybridoma Bank, University of Iowa in a  
1201 dilution of 1:50. The rabbit anti-Scr antibody was used in a dilution of 1:300 (LeMotte  
1202 et al., 1989). Confocal images of antibody stainings represent predominately Z-  
1203 projections and Zeiss LSM510, Zeiss LSM700 or Zeiss LSM880 Airyscan confocal  
1204 laser scanning microscopy systems with an inverted stand Axio Observer  
1205 microscope were used for imaging. Image processing and quantifications have been  
1206 performed in Fiji (Schindelin et al., 2012). For optimal spectral separation, secondary  
1207 antibodies coupled to Alexa405, Alexa488, Alexa594 and Cy5 (ThermoFischer  
1208 Scientific) were used.

1209

#### 1210 Colocalization of wild type and eGFP-tagged MiMIC Antp alleles in imaginal discs

1211 To examine whether the pattern of the MiMIC Antp-eGFP fusion protein  
1212 recapitulates the Antp wild type expression pattern in both embryo and larval  
1213 imaginal discs, we performed immunostainings of heterozygous Antp-eGFP and wild  
1214 type flies to visualize the embryonic (stage 13) and larval expression of *Antp* and  
1215 eGFP. In this experiment, we 1) visualized the overlap between eGFP and *Antp* (the  
1216 eGFP pattern reflects the protein encoded by the MiMIC allele, whereas the *Antp*  
1217 pattern reflects the sum of protein produced by the MiMIC allele and the allele of the  
1218 balancer chromosome) and 2) compared the eGFP expression pattern to the Antp  
1219 expression pattern in wild type discs and embryos.

1220

#### 1221 Induction of early and late overexpression and RNAi-knockdown clones in imaginal 1222 discs

1223 Genetic crosses with approximately 100 virgin female and 100 male flies were  
1224 set up in bottles and the flies were allowed to mate for 2 days. Then, they were  
1225 transferred to new bottles and embryos were collected for 6 hours at 25°C. Flies  
1226 were then transferred to fresh bottles and kept until the next collection at 18°C. To  
1227 assess Antp auto-activation, the collected eggs were allowed to grow at 25°C for 26 h  
1228 from the midpoint of collection, when they were subjected to heat-shock by  
1229 submersion to a water-bath of 38°C for 30 min and then placed back at 25°C until  
1230 they reached the stage of third instar wandering larvae, when they were collected for  
1231 dissection, fixation and staining with antibodies. To assess Antp auto-repression, the  
1232 same procedure was followed, except that the heat-shock was performed at 60 h of  
1233 development after the midpoint of embryo collection. Whenever necessary, larval  
1234 genotypes were selected under a dissection stereomicroscope with green and red  
1235 fluorescence filters on the basis of *deformed* (*dfd*)-YFP bearing balancer  
1236 chromosomes (Le et al., 2006) and visual inspection of fluorescence in imaginal  
1237 discs.

1238

#### 1239 Measurement of Antp transcript variant abundance

1240 The linker between the Antp YPWM motif and the homeodomain contains the  
1241 sequence RSQFGKCQE. Short linker isoforms encode the sequence RSQFE,  
1242 whereas long linker isoforms are generated by alternative splicing of a 12 base pair  
1243 sequence encoding the four amino acid sequence GKCQ into the mRNA. We initially  
1244 designed primer pairs for RT-qPCR experiments to distinguish between the short  
1245 and long linker mRNA variants. For the short linker variant, we used nucleotide  
1246 sequences corresponding to RSQFERKR (with RKR being the first 3 amino acids of  
1247 the homeodomain). For detection of the long linker variant we designed primers

1248 either corresponding to the RSQFGKCQ sequence, or GKCQERKR. We observed in  
1249 control PCRs (using plasmid DNA harboring either a long or a short linker cDNA)  
1250 that primers designed for the short linker variant still amplified the long linker one.  
1251 Moreover, with linker sequences differing in only four amino acids, encoded by 12  
1252 base pairs, primer pairs flanking the linker could also not be used, since, due to very  
1253 similar sizes, both variants would be amplified in RT-qPCR experiments with almost  
1254 equal efficiencies. Therefore, we used primer pairs flanking the linker region to  
1255 indiscriminately amplify short and long linker variants, using non-saturating PCR (18  
1256 cycles) on total cDNA generated from total RNA. We then resolved and assessed  
1257 the relative amounts of long and short linker amplicons in a second step using  
1258 Fragment Analyzer (Advanced Analytical). RNA was extracted from stage 13  
1259 embryos, second instar larvae at 60 h of development, and leg or wing discs from  
1260 third instar wandering larvae using the Trizol<sup>®</sup> reagent (ThermoFischer Scientific),  
1261 following the manufacturer's instructions. Total RNA amounts were measured by  
1262 NanoDrop and equal amounts were used to synthesize cDNA using High-Capacity  
1263 RNA-to-cDNA<sup>™</sup> Kit (ThermoFischer Scientific), following the manufacturer's  
1264 instructions. Total cDNA yields were measured by NanoDrop and equal amounts  
1265 were used in PCR, using in-house produced Taq polymerase. 10 ng of plasmid DNA,  
1266 bearing either a long or a short transcript cDNA were used as a control. PCR product  
1267 abundance was analyzed both by agarose gel electrophoresis and using Fragment  
1268 Analyzer (Advanced Analytical).

1269         The quantification of the transcript variant concentration (Figure 4 D and H)  
1270 has been made considering 100% (value equal to 1 on the y axis) as the sum of long  
1271 and short isoforms at each developmental stage, whereas the quantification of the  
1272 relative activation and repression efficiency has been performed considering the

1273 short linker variant as having 100% repression and the long linker variant as having  
1274 100% activation (values equal to 1 on the y-axis) efficiency.

1275

1276 Quantification of the relative repressing and activating efficiencies of different Antp  
1277 isoforms

1278 Quantification of the relative efficiency of Antp activating and repressing  
1279 isoforms (Figure 4 D and H) were performed in Fiji (Schindelin et al., 2012) by  
1280 selection of the total region of repression or activation of Antp protein or P1 reporter  
1281 staining and quantification of the relative fluorescence intensity of the selected  
1282 regions. 5-7 imaginal disc images per investigated genotype were used for analysis.  
1283 For the repression assay the obtained values have been normalized over the  
1284 intensity of Antp protein calculated in the region of overlap between eGFP and Antp  
1285 (negative control). In both cases (repression and activation), the highest efficiency  
1286 per transcript variant (for repression, the short linker isoform; for activation the long  
1287 linker isoform) have been set to 100%.

1288

1289 Gel-shifts (Electrophoretic Mobility Shift Assays – EMSAs)

1290 Full-length Antp short and long linker variants (transcript variants RM and  
1291 RN), encoding activating and repressing Antp isoforms, respectively, were cloned  
1292 into the pET21b(+) vector (Novagen), which features a C-terminal 6xHis tag, and  
1293 expressed in Rosetta<sup>TM</sup> 2 cells (Novagen), following the manufacturer's standard  
1294 protocol. The two proteins were then Ni-column purified and subjected to gel-  
1295 filtration. The concentrations of purified proteins were then compared by Western  
1296 blotting, using the anti-Antp 4C3 antibody (Developmental Studies Hybridoma Bank,  
1297 University of Iowa), and equal starting concentrations were used in successive



1298 twofold serial dilutions in gel-shift experiments. The BS1 and BS2 binding sites have  
1299 been identified ~2 kb upstream of the *engrailed* gene promoter and characterized for  
1300 Antp binding previously (Affolter et al., 1990). The HB1 binding site has been  
1301 described previously (Keegan et al., 1997) and is a binding site found in the intron of  
1302 the mouse *Hoxa-4* gene. The D4 probe has been characterized previously (Duncan  
1303 et al., 2010) as a functional element in the *spineless* gene.

1304

### 1305 Fluorescence Microscopy Imaging of live imaginal discs and FCS

1306 Fluorescence imaging and FCS measurements were performed on two  
1307 uniquely modified confocal laser scanning microscopy systems, both comprised of  
1308 the ConfoCor3 system (Carl Zeiss, Jena, Germany) and consisting of either an  
1309 inverted microscope for transmitted light and epifluorescence (Axiovert 200 M); a  
1310 VIS-laser module comprising the Ar/ArKr (458, 477, 488 and 514 nm), HeNe 543 nm  
1311 and HeNe 633 nm lasers and the scanning module LSM510 META; or a Zeiss  
1312 LSM780 inverted setup, comprising Diode 405 nm, Ar multiline 458, 488 and 514  
1313 nm, DPSS 561 nm and HeNe 633 nm lasers. Both instruments were modified to  
1314 enable detection using silicon Avalanche Photo Detectors (SPCM-AQR-1X;  
1315 PerkinElmer, USA) for imaging and FCS. Images were recorded at a 512X512 pixel  
1316 resolution. C-Apochromat 40x/1.2 W UV-VIS-IR objectives were used throughout.  
1317 Fluorescence intensity fluctuations were recorded in arrays of 10 consecutive  
1318 measurements, each measurement lasting 10 s. Averaged curves were analyzed  
1319 using the software for online data analysis or exported and fitted offline using the  
1320 OriginPro 8 data analysis software (OriginLab Corporation, Northampton, MA). In  
1321 either case, the nonlinear least square fitting of the autocorrelation curve was  
1322 performed using the Levenberg–Marquardt algorithm. Quality of the fitting was

1323 evaluated by visual inspection and by residuals analysis. Control FCS  
1324 measurements to assess the detection volume were routinely performed prior to data  
1325 acquisition, using dilute solutions of known concentration of Rhodamine 6G and  
1326 Alexa488 dyes. The variability between independent measurements reflects  
1327 variability between cells, rather than imprecision of FCS measurements. For more  
1328 details on Fluorescence Microscopy Imaging and FCS, refer to Supplement 1.

1329

### 1330 Sample size, biological and technical replicates

1331 For the measurement of TF molecular numbers and variability (Figure 1 and  
1332 Figure 1 – figure supplement 1), 7-10 larvae of each fly strain were dissected,  
1333 yielding at least 15 imaginal discs, which were used in FCS analysis. For the Fkh TF,  
1334 7 pairs of salivary glands were analyzed and for AbdB, 12 genital discs were  
1335 dissected from 12 larvae. More than 50 FCS measurements were performed in  
1336 patches of neighboring cells of these dissected discs, in the regions of expression  
1337 indicated in Figure 1 by arrows. Imaginal discs from the same fly strain (expressing a  
1338 given endogenously-tagged TF) were analyzed on at least 3 independent instances  
1339 (FCS sessions), taking place on different days (biological replicates) and for Antp,  
1340 which was further analyzed in this study, more than 20 independent FCS sessions  
1341 were used. As routinely done with FCS measurements in live cells, these  
1342 measurements were evaluated during acquisition and subsequent analysis and,  
1343 based on their quality (high counts per molecule and second, low photobleaching),  
1344 were included in the calculation of concentration and variability. In Figure 1 – figure  
1345 supplement 1 Q,  $n$  denotes the number of FCS measurements included in the  
1346 calculations.

1347 For experiments involving immunostainings in imaginal discs to investigate  
1348 the auto-regulatory behavior of Antp (Figures 2-5 and supplements thereof, except  
1349 for the temporally-resolved auto-activating and repressing study of Antp in Figure 3,  
1350 as discussed above), 14-20 male and female flies were mated in bottles and 10  
1351 larvae were selected by means of fluorescent balancers and processed downstream.  
1352 Up to 20 imaginal discs were visualized by fluorescence microscopy and high  
1353 resolution Z-stacks were acquired for 3-5 representative discs or disc regions of  
1354 interest per experiment. All experiments were performed in triplicate, except for the  
1355 temporal analysis of Antp auto-regulatory behavior in Figure 3 (and figure  
1356 supplements thereof), which was performed 6 times and the quantification of  
1357 repression efficiency of short and long linker Antp isoforms in Figure 5 (and figure  
1358 supplements thereof), which was performed 5 times.

1359 For the quantification of transcript variant abundance in Figure 4 D and H,  
1360 RNA and thus cDNA was prepared from each stage 3 independent times (biological  
1361 replicates) and the transcript abundance per RNA/cDNA sample was also analyzed  
1362 3 times.

1363 For the experiments involving perturbations in Antp expression whereby the  
1364 proper development of the leg and the notum have been assessed in Figure 5, more  
1365 than 100 adult flies have been analyzed and this experiment has been performed  
1366 more than 10 times independently.

1367

## 1368 **References**

1369 Abbott, M.K., and Kaufman, T.C. (1986). The relationship between the functional  
1370 complexity and the molecular organization of the Antennapedia locus of *Drosophila*  
1371 *melanogaster*. *Genetics* 114, 919-942.

- 1372 Affolter, M., Percival-Smith, A., Muller, M., Leupin, W., and Gehring, W.J. (1990).  
1373 DNA binding properties of the purified Antennapedia homeodomain. *Proc Natl Acad*  
1374 *Sci U S A* **87**, 4093-4097.
- 1375 Becskei, A., and Serrano, L. (2000). Engineering stability in gene networks by  
1376 autoregulation. *Nature* **405**, 590-593.
- 1377 Blake, W.J., M, K.A., Cantor, C.R., and Collins, J.J. (2003). Noise in eukaryotic gene  
1378 expression. *Nature* **422**, 633-637.
- 1379 Boettiger, A.N., and Levine, M. (2013). Rapid transcription fosters coordinate snail  
1380 expression in the *Drosophila* embryo. *Cell reports* **3**, 8-15.
- 1381 Buszczak, M., Paterno, S., Lighthouse, D., Bachman, J., Planck, J., Owen, S.,  
1382 Skora, A.D., Nystul, T.G., Ohlstein, B., Allen, A., *et al.* (2007). The carnegie protein  
1383 trap library: a versatile tool for *Drosophila* developmental studies. *Genetics* **175**,  
1384 1505-1531.
- 1385 Calleja, M., Moreno, E., Pelaz, S., and Morata, G. (1996). Visualization of gene  
1386 expression in living adult *Drosophila*. *Science* **274**, 252-255.
- 1387 Clark, N.M., Hinde, E., Winter, C.M., Fisher, A.P., Crosti, G., Blilou, I., Gratton, E.,  
1388 Benfey, P.N., and Sozzani, R. (2016). Tracking transcription factor mobility and  
1389 interaction in *Arabidopsis* roots with fluorescence correlation spectroscopy. *eLife* **5**.
- 1390 Crickmore, M.A., Ranade, V., and Mann, R.S. (2009). Regulation of Ubx expression  
1391 by epigenetic enhancer silencing in response to Ubx levels and genetic variation.  
1392 *PLoS genetics* **5**, e1000633.
- 1393 Crocker, J., Abe, N., Rinaldi, L., McGregor, A.P., Frankel, N., Wang, S., Alsawadi,  
1394 A., Valenti, P., Plaza, S., Payre, F., *et al.* (2015). Low affinity binding site clusters  
1395 confer hox specificity and regulatory robustness. *Cell* **160**, 191-203.

- 1396 Crocker, J., Noon, E.P., and Stern, D.L. (2016). The Soft Touch: Low-Affinity  
1397 Transcription Factor Binding Sites in Development and Evolution. *Current topics in*  
1398 *developmental biology* 117, 455-469.
- 1399 Crocker, J., Tsai, A., Muthusamy, A.K., Lavis, L.K., Singer, R.H., and Stern, D.L.  
1400 (2017). Nuclear microenvironments modulate transcription from low-affinity  
1401 enhancers. *bioRxiv*.
- 1402 Dublanche, Y., Michalodimitrakis, K., Kummerer, N., Foglierini, M., and Serrano, L.  
1403 (2006). Noise in transcription negative feedback loops: simulation and experimental  
1404 analysis. *Mol Syst Biol* 2, 41.
- 1405 Duncan, D., Kiefel, P., and Duncan, I. (2010). Control of the spineless antennal  
1406 enhancer: direct repression of antennal target genes by Antennapedia. *Dev Biol* 347,  
1407 82-91.
- 1408 Dworkin, I., Lee, W., McCloskey, F., and Larsen, E. (2007). Complex genetic  
1409 interactions govern the temporal effects of Antennapedia on antenna-to-leg  
1410 transformations in *Drosophila melanogaster*. *J Genet* 86, 111-123.
- 1411 Ejsmont, R.K., Bogdanzaliewa, M., Lipinski, K.A., and Tomancak, P. (2011).  
1412 Production of fosmid genomic libraries optimized for liquid culture recombineering  
1413 and cross-species transgenesis. *Methods in molecular biology* 772, 423-443.
- 1414 Ejsmont, R.K., Sarov, M., Winkler, S., Lipinski, K.A., and Tomancak, P. (2009). A  
1415 toolkit for high-throughput, cross-species gene engineering in *Drosophila*. *Nat*  
1416 *Methods* 6, 435-437.
- 1417 Elowitz, M.B., Levine, A.J., Siggia, E.D., and Swain, P.S. (2002). Stochastic gene  
1418 expression in a single cell. *Science* 297, 1183-1186.
- 1419 Engstrom, Y., Schneuwly, S., and Gehring, W.J. (1992). Spatial and Temporal  
1420 Expression of an Antennapedia Lac Z Gene Construct Integrated into the

1421 Endogenous Antennapedia Gene of *Drosophila-Melanogaster*. *Dev Genes Evol* *201*,  
1422 65-80.

1423 Franz, K., Singh, A., and Weinberger, L.S. (2011). Lentiviral vectors to study  
1424 stochastic noise in gene expression. *Methods in enzymology* *497*, 603-622.

1425 Garaulet, D.L., Foronda, D., Calleja, M., and Sanchez-Herrero, E. (2008). Polycomb-  
1426 dependent Ultrabithorax Hox gene silencing induced by high Ultrabithorax levels in  
1427 *Drosophila*. *Development* *135*, 3219-3228.

1428 Gillespie, D.T. (2007). Stochastic simulation of chemical kinetics. *Annu Rev Phys*  
1429 *Chem* *58*, 35-55.

1430 Gregor, T., Tank, D.W., Wieschaus, E.F., and Bialek, W. (2007a). Probing the limits  
1431 to positional information. *Cell* *130*, 153-164.

1432 Gregor, T., Wieschaus, E.F., McGregor, A.P., Bialek, W., and Tank, D.W. (2007b).  
1433 Stability and nuclear dynamics of the bicoid morphogen gradient. *Cell* *130*, 141-152.

1434 Gronlund, A., Lotstedt, P., and Elf, J. (2013). Transcription factor binding kinetics  
1435 constrain noise suppression via negative feedback. *Nat Commun* *4*, 1864.

1436 Holloway, D.M., Lopes, F.J., da Fontoura Costa, L., Travencolo, B.A., Golyandina,  
1437 N., Usevich, K., and Spirov, A.V. (2011). Gene expression noise in spatial patterning:  
1438 hunchback promoter structure affects noise amplitude and distribution in *Drosophila*  
1439 segmentation. *PLoS computational biology* *7*, e1001069.

1440 Holloway, D.M., and Spirov, A.V. (2015). Mid-embryo patterning and precision in  
1441 *Drosophila* segmentation: Kruppel dual regulation of hunchback. *PLoS One* *10*,  
1442 e0118450.

1443 Ito, K., Awano, W., Suzuki, K., Hiromi, Y., and Yamamoto, D. (1997). The *Drosophila*  
1444 mushroom body is a quadruple structure of clonal units each of which contains a  
1445 virtually identical set of neurones and glial cells. *Development* *124*, 761-771.

- 1446 Jorgensen, E.M., and Garber, R.L. (1987). Function and malfunction of the two  
1447 promoters of the *Drosophila Antennapedia* gene. *Genes Dev* 1, 544-555.
- 1448 Kang, M., Piliszek, A., Artus, J., and Hadjantonakis, A.K. (2013). FGF4 is required  
1449 for lineage restriction and salt-and-pepper distribution of primitive endoderm factors  
1450 but not their initial expression in the mouse. *Development* 140, 267-279.
- 1451 Kaur, G., Costa, M.W., Nefzger, C.M., Silva, J., Fierro-Gonzalez, J.C., Polo, J.M.,  
1452 Bell, T.D., and Plachta, N. (2013). Probing transcription factor diffusion dynamics in  
1453 the living mammalian embryo with photoactivatable fluorescence correlation  
1454 spectroscopy. *Nat Commun* 4, 1637.
- 1455 Keegan, L.P., Haerry, T.E., Crotty, D.A., Packer, A.I., Wolgemuth, D.J., and Gehring,  
1456 W.J. (1997). A sequence conserved in vertebrate Hox gene introns functions as an  
1457 enhancer regulated by posterior homeotic genes in *Drosophila* imaginal discs.  
1458 *Mechanisms of development* 63, 145-157.
- 1459 Kelso, R.J., Buszczak, M., Quinones, A.T., Castiblanco, C., Mazzalupo, S., and  
1460 Cooley, L. (2004). Flytrap, a database documenting a GFP protein-trap insertion  
1461 screen in *Drosophila melanogaster*. *Nucleic Acids Res* 32, D418-420.
- 1462 Krasnow, M.A., Saffman, E.E., Kornfeld, K., and Hogness, D.S. (1989).  
1463 Transcriptional activation and repression by Ultrabithorax proteins in cultured  
1464 *Drosophila* cells. *Cell* 57, 1031-1043.
- 1465 Kuziora, M.A., and McGinnis, W. (1988). Autoregulation of a *Drosophila* homeotic  
1466 selector gene. *Cell* 55, 477-485.
- 1467 Lam, C.S., Mistri, T.K., Foo, Y.H., Sudhaharan, T., Gan, H.T., Rodda, D., Lim, L.H.,  
1468 Chou, C., Robson, P., Wohland, T., *et al.* (2012). DNA-dependent Oct4-Sox2  
1469 interaction and diffusion properties characteristic of the pluripotent cell state revealed  
1470 by fluorescence spectroscopy. *The Biochemical journal* 448, 21-33.

1471 Le, T., Liang, Z., Patel, H., Yu, M.H., Sivasubramaniam, G., Slovitt, M., Tanentzapf,  
1472 G., Mohanty, N., Paul, S.M., Wu, V.M., *et al.* (2006). A new family of *Drosophila*  
1473 balancer chromosomes with a w- dfd-GMR yellow fluorescent protein marker.  
1474 *Genetics* 174, 2255-2257.

1475 LeMotte, P.K., Kuroiwa, A., Fessler, L.I., and Gehring, W.J. (1989). The homeotic  
1476 gene *Sex Combs Reduced* of *Drosophila*: gene structure and embryonic expression.  
1477 *EMBO J* 8, 219-227.

1478 Li, Y., Wang, F., Lee, J.A., and Gao, F.B. (2006). MicroRNA-9a ensures the precise  
1479 specification of sensory organ precursors in *Drosophila*. *Genes Dev* 20, 2793-2805.

1480 Little, S.C., Tikhonov, M., and Gregor, T. (2013). Precise developmental gene  
1481 expression arises from globally stochastic transcriptional activity. *Cell* 154, 789-800.

1482 Lo, C.A., Kays, I., Emran, F., Lin, T.J., Cvetkovska, V., and Chen, B.E. (2015).  
1483 Quantification of Protein Levels in Single Living Cells. *Cell reports* 13, 2634-2644.

1484 Lucas, T., Ferraro, T., Roelens, B., De Las Heras Chanes, J., Walczak, A.M.,  
1485 Coppey, M., and Dostatni, N. (2013). Live imaging of bicoid-dependent transcription  
1486 in *Drosophila* embryos. *Current biology : CB* 23, 2135-2139.

1487 Mistri, T.K., Devasia, A.G., Chu, L.T., Ng, W.P., Halbritter, F., Colby, D., Martynoga,  
1488 B., Tomlinson, S.R., Chambers, I., Robson, P., *et al.* (2015). Selective influence of  
1489 Sox2 on POU transcription factor binding in embryonic and neural stem cells. *EMBO*  
1490 *reports* 16, 1177-1191.

1491 Morin, X., Daneman, R., Zavortink, M., and Chia, W. (2001). A protein trap strategy  
1492 to detect GFP-tagged proteins expressed from their endogenous loci in *Drosophila*.  
1493 *Proc Natl Acad Sci U S A* 98, 15050-15055.



1494 Muller, C.B., Loman, A., Pacheco, V., Koberling, F., Willbold, D., Richtering, W., and  
1495 Enderlein, J. (2008). Precise measurement of diffusion by multi-color dual-focus  
1496 fluorescence correlation spectroscopy. *Epl-Europhys Lett* **83**.

1497 Nevozhay, D., Adams, R.M., Murphy, K.F., Josic, K., and Balazsi, G. (2009).  
1498 Negative autoregulation linearizes the dose-response and suppresses the  
1499 heterogeneity of gene expression. *Proc Natl Acad Sci U S A* **106**, 5123-5128.

1500 Newman, J.R., Ghaemmaghami, S., Ihmels, J., Breslow, D.K., Noble, M., DeRisi,  
1501 J.L., and Weissman, J.S. (2006). Single-cell proteomic analysis of *S. cerevisiae*  
1502 reveals the architecture of biological noise. *Nature* **441**, 840-846.

1503 Papadopoulos, D.K., Krmpot, A.J., Nikolic, S.N., Krautz, R., Terenius, L., Tomancak,  
1504 P., Rigler, R., Gehring, W.J., and Vukojevic, V. (2015). Probing the kinetic landscape  
1505 of Hox transcription factor-DNA binding in live cells by massively parallel  
1506 Fluorescence Correlation Spectroscopy. *Mechanisms of development* **138 Pt 2**, 218-  
1507 225.

1508 Papadopoulos, D.K., Resendez-Perez, D., Cardenas-Chavez, D.L., Villanueva-  
1509 Segura, K., Canales-del-Castillo, R., Felix, D.A., Funfschilling, R., and Gehring, W.J.  
1510 (2011). Functional synthetic Antennapedia genes and the dual roles of YPWM motif  
1511 and linker size in transcriptional activation and repression. *Proc Natl Acad Sci U S A*  
1512 **108**, 11959-11964.

1513 Papadopoulos, D.K., Vukojevic, V., Adachi, Y., Terenius, L., Rigler, R., and Gehring,  
1514 W.J. (2010). Function and specificity of synthetic Hox transcription factors in vivo.  
1515 *Proc Natl Acad Sci U S A* **107**, 4087-4092.

1516 Pare, A., Lemons, D., Kosman, D., Beaver, W., Freund, Y., and McGinnis, W.  
1517 (2009). Visualization of individual *Scr* mRNAs during *Drosophila* embryogenesis  
1518 yields evidence for transcriptional bursting. *Current biology : CB* **19**, 2037-2042.

- 1519 Paulsson, J. (2004). Summing up the noise in gene networks. *Nature* *427*, 415-418.
- 1520 Pavlopoulos, A., and Akam, M. (2011). Hox gene Ultrabithorax regulates distinct sets  
1521 of target genes at successive stages of *Drosophila* haltere morphogenesis. *Proc Natl*  
1522 *Acad Sci U S A* *108*, 2855-2860.
- 1523 Pelaez, N., Gavalda-Miralles, A., Wang, B., Navarro, H.T., Gudjonson, H., Rebay, I.,  
1524 Dinner, A.R., Katsaggelos, A.K., Amaral, L.A., and Carthew, R.W. (2015). Dynamics  
1525 and heterogeneity of a fate determinant during transition towards cell differentiation.  
1526 *eLife* *4*.
- 1527 Perez-Camps, M., Tian, J., Chng, S.C., Sem, K.P., Sudhakaran, T., Teh, C.,  
1528 Wachsmuth, M., Korzh, V., Ahmed, S., and Reversade, B. (2016). Quantitative  
1529 imaging reveals real-time Pou5f3-Nanog complexes driving dorsoventral  
1530 mesendoderm patterning in zebrafish. *eLife* *5*.
- 1531 Plachta, N., Bollenbach, T., Pease, S., Fraser, S.E., and Pantazis, P. (2011). Oct4  
1532 kinetics predict cell lineage patterning in the early mammalian embryo. *Nat Cell Biol*  
1533 *13*, 117-123.
- 1534 Quinones-Coello, A.T., Petrella, L.N., Ayers, K., Melillo, A., Mazzalupo, S., Hudson,  
1535 A.M., Wang, S., Castiblanco, C., Buszczak, M., Hoskins, R.A., *et al.* (2007).  
1536 Exploring strategies for protein trapping in *Drosophila*. *Genetics* *175*, 1089-1104.
- 1537 Rao, C.V., and Arkin, A.P. (2003). Stochastic chemical kinetics and the quasi-  
1538 steady-state assumption: Application to the Gillespie algorithm. *J Chem Phys* *118*,  
1539 4999-5010.
- 1540 Reed, H.C., Hoare, T., Thomsen, S., Weaver, T.A., White, R.A., Akam, M., and  
1541 Alonso, C.R. (2010). Alternative splicing modulates Ubx protein function in  
1542 *Drosophila melanogaster*. *Genetics* *184*, 745-758.

- 1543 Saadaoui, M., Merabet, S., Litim-Mecheri, I., Arbeille, E., Sambrani, N., Damen, W.,  
1544 Brena, C., Pradel, J., and Graba, Y. (2011). Selection of distinct Hox-Extradenticle  
1545 interaction modes fine-tunes Hox protein activity. *Proc Natl Acad Sci U S A* *108*,  
1546 2276-2281.
- 1547 Sanchez, A., Garcia, H.G., Jones, D., Phillips, R., and Kondev, J. (2011). Effect of  
1548 promoter architecture on the cell-to-cell variability in gene expression. *PLoS*  
1549 *computational biology* *7*, e1001100.
- 1550 Sarov, M., Barz, C., Jambor, H., Hein, M.Y., Schmied, C., Suchold, D., Stender, B.,  
1551 Janosch, S., K, J.V., Krishnan, R.T., *et al.* (2016). A genome-wide resource for the  
1552 analysis of protein localisation in *Drosophila*. *eLife* *5*, e12068.
- 1553 Schindelin, J., Arganda-Carreras, I., Frise, E., Kaynig, V., Longair, M., Pietzsch, T.,  
1554 Preibisch, S., Rueden, C., Saalfeld, S., Schmid, B., *et al.* (2012). Fiji: an open-source  
1555 platform for biological-image analysis. *Nat Methods* *9*, 676-682.
- 1556 Schwanhauser, B., Busse, D., Li, N., Dittmar, G., Schuchhardt, J., Wolf, J., Chen,  
1557 W., and Selbach, M. (2011). Global quantification of mammalian gene expression  
1558 control. *Nature* *473*, 337-342.
- 1559 Sheth, R., Bastida, M.F., Kmita, M., and Ros, M. (2014). "Self-Regulation," A New  
1560 Facet of Hox Genes' Function. *Dev Dynam* *243*, 182-191.
- 1561 Shimoga, V., White, J.T., Li, Y., Sontag, E., and Bleris, L. (2013). Synthetic  
1562 mammalian transgene negative autoregulation. *Mol Syst Biol* *9*, 670.
- 1563 Slattery, M., Voutev, R., Ma, L., Negre, N., White, K.P., and Mann, R.S. (2013).  
1564 Divergent transcriptional regulatory logic at the intersection of tissue growth and  
1565 developmental patterning. *PLoS genetics* *9*, e1003753.
- 1566 Smolander, O.P., Kandhavelu, M., Mannerstrom, H., Lihavainen, E., Kalaichelvan,  
1567 S., Healy, S., Yli-Harja, O., Karp, M., and Ribeiro, A.S. (2011). Cell-to-cell diversity in

1568 protein levels of a gene driven by a tetracycline inducible promoter. BMC molecular  
1569 biology 12, 21.

1570 Stroehler, V.L., Gaiser, J.C., and Garber, R.L. (1988). Alternative RNA splicing that is  
1571 spatially regulated: generation of transcripts from the Antennapedia gene of  
1572 Drosophila melanogaster with different protein-coding regions. Molecular and cellular  
1573 biology 8, 4143-4154.

1574 Swain, P.S., Elowitz, M.B., and Siggia, E.D. (2002). Intrinsic and extrinsic  
1575 contributions to stochasticity in gene expression. Proc Natl Acad Sci U S A 99,  
1576 12795-12800.

1577 Szaloki, N., Krieger, J.W., Komaromi, I., Toth, K., and Vamosi, G. (2015). Evidence  
1578 for Homodimerization of the c-Fos Transcription Factor in Live Cells Revealed by  
1579 Fluorescence Microscopy and Computer Modeling. Molecular and cellular biology  
1580 35, 3785-3798.

1581 Taniguchi, Y., Choi, P.J., Li, G.W., Chen, H., Babu, M., Hearn, J., Emili, A., and Xie,  
1582 X.S. (2010). Quantifying E. coli proteome and transcriptome with single-molecule  
1583 sensitivity in single cells. Science 329, 533-538.

1584 Thattai, M., and van Oudenaarden, A. (2001). Intrinsic noise in gene regulatory  
1585 networks. Proc Natl Acad Sci U S A 98, 8614-8619.

1586 Tiwari, M., Mikuni, S., Muto, H., and Kinjo, M. (2013). Determination of dissociation  
1587 constant of the NFkappaB p50/p65 heterodimer using fluorescence cross-correlation  
1588 spectroscopy in the living cell. Biochemical and biophysical research  
1589 communications 436, 430-435.

1590 Tsutsumi, M., Muto, H., Myoba, S., Kimoto, M., Kitamura, A., Kamiya, M., Kikukawa,  
1591 T., Takiya, S., Demura, M., Kawano, K., *et al.* (2016). In vivo fluorescence correlation

1592 spectroscopy analyses of FMBP-1, a silkworm transcription factor. FEBS open bio 6,  
1593 106-125.

1594 Venken, K.J., Schulze, K.L., Haelterman, N.A., Pan, H., He, Y., Evans-Holm, M.,  
1595 Carlson, J.W., Levis, R.W., Spradling, A.C., Hoskins, R.A., *et al.* (2011). MiMIC: a  
1596 highly versatile transposon insertion resource for engineering *Drosophila*  
1597 *melanogaster* genes. Nat Methods 8, 737-743.

1598 Vukojevic, V., Heidkamp, M., Ming, Y., Johansson, B., Terenius, L., and Rigler, R.  
1599 (2008). Quantitative single-molecule imaging by confocal laser scanning microscopy.  
1600 Proc Natl Acad Sci U S A 105, 18176-18181.

1601 Vukojevic, V., Papadopoulos, D.K., Terenius, L., Gehring, W.J., and Rigler, R.  
1602 (2010). Quantitative study of synthetic Hox transcription factor-DNA interactions in  
1603 live cells. Proc Natl Acad Sci U S A 107, 4093-4098.

1604 Zechner, C., Ruess, J., Krenn, P., Pelet, S., Peter, M., Lygeros, J., and Koepl, H.  
1605 (2012). Moment-based inference predicts bimodality in transient gene expression.  
1606 Proc Natl Acad Sci U S A 109, 8340-8345.

1607 Zink, B., Engstrom, Y., Gehring, W.J., and Paro, R. (1991). Direct interaction of the  
1608 Polycomb protein with Antennapedia regulatory sequences in polytene  
1609 chromosomes of *Drosophila melanogaster*. EMBO J 10, 153-162.

1610

## 1611 **Supplemental information**

### 1612 Supplement 1: Background on Fluorescence Microscopy Imaging and FCS

1613 Two individually modified instruments (Zeiss, LSM 510 and 780, ConfoCor 3)  
1614 with fully integrated FCS/CLSM optical pathways were used for imaging. The  
1615 detection efficiency of CLSM imaging was significantly improved by the introduction  
1616 of APD detectors. As compared to PMTs, which are normally used as detectors in

1617 conventional CLSM, the APDs are characterized by higher quantum yield and  
1618 collection efficiency – about 70 % in APDs as compared to 15 – 25 % in PMTs,  
1619 higher gain, negligible dark current and better efficiency in the red part of the  
1620 spectrum. Enhanced fluorescence detection efficiency enabled image collection  
1621 using fast scanning ( $1 - 5 \mu s/pixel$ ). This enhances further the signal-to-noise-ratio  
1622 by avoiding fluorescence loss due to triplet state formation, enabling fluorescence  
1623 imaging with single-molecule sensitivity. In addition, low laser intensities  
1624 ( $150-750 \mu W$ ) could be applied for imaging, significantly reducing the photo-toxicity  
1625 (Vukojevic et al., 2008).

1626 FCS measurements are performed by recording fluorescence intensity  
1627 fluctuations in a very small, approximately ellipsoidal observation volume element  
1628 (OVE) (about  $0.2 \mu m$  wide and  $1 \mu m$  long) that is generated in imaginal disc cells by  
1629 focusing the laser light through the microscope objective and by collecting the  
1630 fluorescence light through the same objective using a pinhole in front of the detector  
1631 to block out-of-focus light. The fluorescence intensity fluctuations, caused by  
1632 fluorescently labeled molecules passing through the OVE are analyzed using  
1633 temporal autocorrelation analysis.

1634 In temporal autocorrelation analysis we first derive the autocorrelation  
1635 function  $G(\tau)$ :

1636 
$$G(\tau) = 1 + \frac{\langle \delta I(t) \cdot \delta I(t+\tau) \rangle}{\langle I(t) \rangle^2} \quad (S1),$$

1637 where  $\delta I(t) = I(t) - \langle I(t) \rangle$  is the deviation from the mean intensity at time  $t$  and  
1638  $\delta I(t + \tau) = I(t + \tau) - \langle I(t) \rangle$  is the deviation from the mean intensity at time  $t + \tau$ .  
1639 For further analysis, an autocorrelation curve is derived by plotting  $G(\tau)$  as a  
1640 function of the lag time, i.e. the autocorrelation time  $\tau$ .

1641 To derive information about molecular numbers and their corresponding  
 1642 diffusion time, the experimentally obtained autocorrelation curves are compared to  
 1643 autocorrelation functions derived for different model systems. A model describing  
 1644 free three dimensional (3D) diffusion of two components and triplet formation was  
 1645 used in this study:

$$G(\tau) = 1 + \frac{1}{N} \left( \frac{1-y}{\left(1 + \frac{\tau}{\tau_{D_1}}\right) \cdot \sqrt{1 + \frac{w_{xy}^2 \tau}{w_z^2 \tau_{D_1}}}} + \frac{y}{\left(1 + \frac{\tau}{\tau_{D_2}}\right) \cdot \sqrt{1 + \frac{w_{xy}^2 \tau}{w_z^2 \tau_{D_2}}}} \right) \cdot \left( 1 + \frac{T}{1-T} \cdot e^{-\frac{\tau}{\tau_T}} \right)$$

1646 (S2)

1647 In the above equation,  $N$  is the average number of molecules in the OVE;  $y$  is the fraction of  
 1648 the slowly moving Antp-eGFP molecules;  $\tau_{D_1}$  is the diffusion time of the free Antp-eGFP  
 1649 molecules;  $\tau_{D_2}$  is the diffusion time of Antp-eGFP molecules undergoing interactions with the  
 1650 DNA;  $w_{xy}$  and  $w_z$  are radial and axial parameters, respectively, related to spatial properties  
 1651 of the OVE;  $T$  is the average equilibrium fraction of molecules in the triplet state; and  $\tau_T$  the  
 1652 triplet correlation time related to rate constants for intersystem crossing and the triplet decay.  
 1653 Spatial properties of the detection volume, represented by the square of the ratio of the axial  
 1654 and radial parameters  $\left(\frac{w_z}{w_{xy}}\right)^2$ , are determined in calibration measurements performed  
 1655 using a solution of Rhodamine 6G for which the diffusion coefficient ( $D$ ) is known to be  
 1656  $D_{Rh6G} = 4.1 \cdot 10^{-10} \text{ m}^2\text{s}^{-1}$  (Muller et al., 2008). The diffusion time,  $\tau_D$ , measured by FCS, is  
 1657 related to the translation diffusion coefficient  $D$  by:

1658 
$$\tau_D = \frac{w_{xy}^2}{4D} \text{ (S3).}$$

1659 To establish that Antp molecules diffusing through the OVE are the underlying cause of the  
 1660 recorded fluorescence intensity fluctuations, we plotted the characteristic decay times  $\tau_{D_1}$   
 1661 and  $\tau_{D_2}$ , obtained by FCS, as a function of the total concentration of Antp molecules (Figure

1662 1 – figure supplement 2). We observed that both characteristic decay times remain stable for  
1663 increasing total concentration of Antp molecules, signifying that the underlying process  
1664 triggering the fluorescence intensity fluctuations is diffusion of fluorescent Antp molecules  
1665 through the OVE (which should be independent of the total concentration of Antp  
1666 molecules).

1667 Supplement 2: Calculation of the concentration of endogenous TFs and average  
1668 number of molecules in imaginal disc cell nuclei from FCS measurements  
1669 (exemplified for Antp)

1670 The Observation Volume Element (OVE), which can be approximated by a  
1671 prolate ellipsoid, has a volume of:

$$1672 \quad V_{OVE} = \pi^{\frac{3}{2}} \cdot w_{xy}^2 \cdot z_0 = 5.57 \cdot 0.1847^2 \cdot 1 = 0.223 \cdot 10^{-18} \text{ m}^3 = 0.19 \cdot 10^{-15} \text{ L (S4)}.$$

1673 Therefore, one fluorescent molecule in the OVE yields equal concentration to:

$$1674 \quad \frac{1}{0.19 \cdot 10^{-15}} = 5.263 \cdot 10^{15} \text{ molecules per L.}$$

1675 1 M of Antp-eGFP molecules equals  $6.022 \cdot 10^{23}$  molecules/L,

1676  $x$  M of Antp-eGFP molecules equal  $5.263 \cdot 10^{15}$  molecules/L.

1677 Therefore:

$$1678 \quad x = \frac{5.263 \cdot 10^{15}}{6.022 \cdot 10^{23}} = 0.874 \cdot 10^{-8} \text{ M} = 8.74 \text{ nM (S5)}.$$

1679 This indicates that one molecule in the OVE corresponds on the average to  
1680 8.74 nM concentration of fluorescent molecules in the nucleus.

1681 The wing disc cells within the Antp expression domain (prescutum precursors)  
1682 are not spherical, but rather ellipsoidal. Their axes were determined by fluorescence  
1683 imaging to be 1.4  $\mu\text{m}$  in the transverse dimension and 2.8  $\mu\text{m}$  in the longitudinal. The  
1684 volume of the nucleus was approximated by the volume of a prolate ellipsoid:



1685  $V_{nucleus} = \frac{4}{3}\pi a^2 b = \frac{4}{3} \cdot 3.14 \cdot (1.4 \cdot 10^{-6})^2 \cdot 2.8 \cdot 10^{-6} m^3 = 22.99 \cdot 10^{-18} m^3 = 22.99 \cdot$   
1686  $10^{-15} L$  (S6).

1687 Therefore, the OVE represents roughly 1/121 of the nuclear volume:

1688  $\frac{V_{nucleus}}{V_{OVE}} = 121$  (S7)

1689 and the number of molecules in Antp-eGFP nuclei is on the average  $57.37 \cdot 121 \approx$   
1690 6942 molecules.

1691 The concentration of Antp in the wing disc nuclei is calculated as follows:

1692 1 mol of Antp-eGFP molecules equals  $6.023 \cdot 10^{23}$ ,

1693  $n$  mol of Antp-eGFP molecules equal 6942.

1694 Thus  $n_{Antp-eGFP} = \frac{6942}{6.022 \cdot 10^{23}} = 1152.77 \cdot 10^{-23} mol$  (S8).

1695 Thus the concentration of Antp-eGFP within the diploid wing disc nucleus will  
1696 be:

1697  $C_{Antp-eGFP} = \frac{1182.77 \cdot 10^{-23}}{22.99 \cdot 10^{-15}} = 50.1 \cdot 10^{-8} M \approx 501 nM$  (S9),

1698 equivalent to  $57.37 \cdot 8.74 \approx 501 nM$ .

1699 Fitting of autocorrelation curves using a model for free three dimensional (3D)  
1700 diffusion of two components and triplet, revealed that on the average 63% of the total  
1701 Antp-eGFP molecules are fast moving and appear to be freely diffusing in the  
1702 nucleus, whereas 37% are slow and are likely participating in the formation of  
1703 complexes with chromatin.

1704

1705 Supplement 3: Calculation of the ratio of apparent Antp dissociation constant for  
1706 short and long linker Antp isoforms from FCS measurements on ectopically  
1707 expressed Antp

1708 The Antp TF undergoes both specific and non-specific interactions with DNA.  
 1709 Assuming that non-specific interactions precede the specific ones, a two-step  
 1710 process of consecutive reactions is anticipated (Vukojevic et al., 2010):

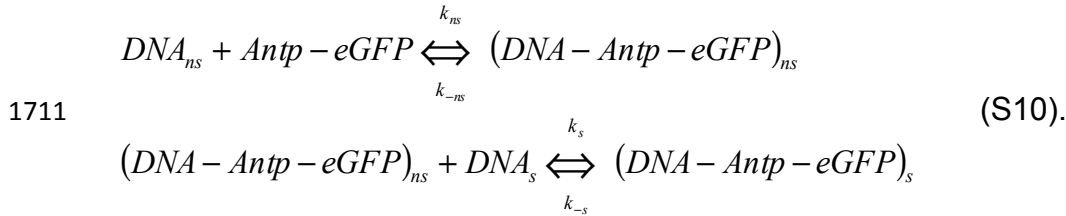

1712 The turnover rate for the non-specific complex is:

$$\begin{aligned}
 & \frac{d[(DNA - Antp - eGFP)_{ns}]}{dt} = k_{ns} \cdot [DNA_{ns}] \cdot [Antp - eGFP] - (k_{-ns} + k_s \cdot [DNA_s]) \cdot [(DNA - Antp - eGFP)_{ns}] \\
 & + k_{-s} \cdot [(DNA - Antp - eGFP)_s] \tag{S11}.
 \end{aligned}$$

1715 Assuming a quasi-steady state approximation:

$$\begin{aligned}
 & \frac{d[(DNA - Antp - eGFP)_{ns}]}{dt} = 0 \tag{S11}, \\
 & (k_{-ns} + k_s \cdot [DNA_s]) \cdot [(DNA - Antp - eGFP)_{ns}] = k_{ns} \cdot [DNA_{ns}] \cdot [Antp - eGFP] + \\
 & k_{-s} \cdot [(DNA - Antp - eGFP)_s] \tag{S12}.
 \end{aligned}$$

1719 Using the mass balance equation to express the concentration of the free TF:

$$\begin{aligned}
 & [Antp - eGFP] = [Antp - eGFP]_0 - [(DNA - Antp - eGFP)_{ns}] - [(DNA - Antp - eGFP)_s] \tag{S13}
 \end{aligned}$$

1722 and assuming that:

$$[DNA]_{ns} \approx [DNA]_0 \tag{S14},$$

1724 equation (S4) becomes:

$$\begin{aligned}
 & (k_{-ns} + k_s \cdot [DNA_s]) \cdot [(DNA - Antp - eGFP)_{ns}] = k_{ns} \cdot [DNA]_0 \cdot [Antp - eGFP]_0 - \\
 & [(DNA - Antp - eGFP)_{ns}] - [(DNA - Antp - eGFP)_s] + k_{-s} \cdot [(DNA - Antp - eGFP)_s] \\
 & \tag{S15},
 \end{aligned}$$

$$(k_{-ns} + k_s \cdot [DNA_s] + k_{ns} \cdot [DNA]_0) \cdot [(DNA - Antp - eGFP)_{ns}] = k_{ns} \cdot [DNA]_0 \cdot$$

$$([Antp - eGFP]_0 - [(DNA - Antp - eGFP)_s]) + k_{-s} \cdot [(DNA - Antp - eGFP)_s] \tag{S16},$$

1730

$$1731 \quad (k_{-ns} + k_s \cdot [DNA_s] + k_{ns} \cdot [DNA]_0) \cdot [(DNA - Antp - eGFP)_{ns}] = k_{ns} \cdot [DNA]_0 \cdot$$

$$1732 \quad [Antp - eGFP]_0 - (k_{ns} \cdot [DNA]_0 - k_{-s}) \cdot [(DNA - Antp - eGFP)_s] \quad (S17),$$

1733

$$1734 \quad [(DNA - Antp - eGFP)_{ns}] =$$

$$1735 \quad \frac{k_{ns} \cdot [DNA]_0}{k_{-ns} + k_s \cdot [DNA_s] + k_{ns} \cdot [DNA]_0} \cdot [Antp - eGFP]_0 - \frac{k_{ns} \cdot [DNA]_0 - k_{-s}}{k_{-ns} + k_s \cdot [DNA_s] + k_{ns} \cdot [DNA]_0} \cdot [(DNA - Antp -$$

$$1736 \quad eGFP)_s] \quad (S18).$$

1737 According to equation (S18) and the FCS data presented in Figure 4 – figure

1738 supplement 2, the slope of the linear dependence for

1739 a) the short linker Antp isoform gives:

$$1740 \quad \frac{k_{ns} \cdot [DNA]_0}{k_{-ns} + k_s \cdot [DNA_s] + k_{ns} \cdot [DNA]_0} = 0.34 \quad (S19)$$

1741 and the intercept:

$$1742 \quad \frac{k_{ns} \cdot [DNA]_0 - k_{-s}}{k_{-ns} + k_s \cdot [DNA_s] + k_{ns} \cdot [DNA]_0} \cdot [(DNA - Antp - eGFP)_s] = 5.31 \text{ nM} \quad (S20).$$

1743 If  $k_{-s}$  is small compared to  $k_{ns} \cdot [DNA]_0$  and can therefore be neglected, then:

$$1744 \quad 0.34 \cdot [(DNA - Antp - eGFP)_s] = 5.31 \text{ nM} \quad (S21).$$

1745 Thus, the concentration of specific complex between Antp-eGFP and DNA in

1746 the wing disc cell nuclei can be estimated to be:

$$1747 \quad [(DNA - Antp - eGFP)_s] = 15.62 \text{ nM} \quad (S22).$$

1748 The average concentration of free-diffusing Antp-eGFP molecules is

1749 determined as follows:

$$1750 \quad [Antp - eGFP]_{free} = [Antp - eGFP]_0 - [(DNA - Antp - eGFP)_{ns}] - [(DNA - Antp -$$

$$1751 \quad eGFP)_s] = [Antp - eGFP]_0 - (0.34 \cdot [Antp - eGFP]_0 - 5.31) - [(DNA - Antp -$$

$$1752 \quad eGFP)_s] = 785.28 - 0.34 \cdot 785.28 + 5.31 - 15.62 = 507.97 \text{ nM} \quad (S23).$$

1753 Using the experimentally determined concentration of specific DNA–Antp-  
 1754 eGFP complexes (equation (S22)), we could estimate the dissociation constant for  
 1755 the specific DNA–Antp-eGFP, as a function of the total concentration of specific Antp  
 1756 binding sites, to be:

$$1757 \quad K_{d, Antp}^{short linker} = \frac{[DNA_s]_{free} \cdot [Antp-eGFP]_{free}}{[(DNA-Antp-eGFP)_s]} = \frac{[DNA_s]_{free} \cdot 507.97}{15.62} \approx ([DNA_s]_{free} \cdot 32.52) nM$$

1758 (S24).

1759 b) The long linker Antp isoform gives:

$$1760 \quad \frac{k_{ns} \cdot [DNA]_0}{k_{-ns} + k_s \cdot [DNA_s] + k_{ns} \cdot [DNA]_0} = 0.24 \text{ (S25).}$$

1761 and the intercept:

$$1762 \quad \frac{k_{ns} \cdot [DNA]_0 - k_{-s}}{k_{-ns} + k_s \cdot [DNA_s] + k_{ns} \cdot [DNA]_0} \cdot [(DNA - Antp - eGFP)_s] = 3.28 nM \text{ (S26).}$$

1763 If  $k_{-s}$  is small compared to  $k_{ns} \cdot [DNA]_0$  and can therefore be neglected, then:

$$1764 \quad 0.24 \cdot [(DNA - Antp - eGFP)_s] = 3.28 nM \text{ (S27).}$$

1765 Thus, the concentration of specific complex between Antp-eGFP and DNA in  
 1766 the wing disc cell nuclei can be estimated to be:

$$1767 \quad [(DNA - Antp - eGFP)_s] = 13.67 nM \text{ (S28).}$$

1768 The average concentration of free-diffusing Antp-eGFP molecules is  
 1769 determined as follows:

$$1770 \quad [Antp - eGFP]_{free} = [Antp - eGFP]_0 - [(DNA - Antp - eGFP)_{ns}] - [(DNA - Antp -$$

$$1771 \quad eGFP)_s] = [Antp - eGFP]_0 - (0.24 \cdot [Antp - eGFP]_0 - 3.28) - [(DNA - Antp -$$

$$1772 \quad eGFP)_s] = 1382.95 - 0.24 \cdot 785.28 + 3.28 - 13.67 = 1040.65 nM \text{ (S29).}$$

1773 Using the experimentally determined concentration of specific DNA–Antp-  
 1774 eGFP complexes (equation (S14)), we could estimate the dissociation constant for

1775 the specific DNA–Antp-eGFP, as a function of the total concentration of specific Antp  
 1776 binding sites, to be:

$$1777 \quad K_{d, Antp}^{long linker} = \frac{[DNA_s]_{free} \cdot [Antp-eGFP]_{free}}{[(DNA-Antp-eGFP)_s]} = \frac{[DNA_s]_{free} \cdot 1040.65}{13.67} \approx ([DNA_s]_{free} \cdot 76.13) nM$$

$$1778 \quad (S30).$$

1779 From equations (S24) and (S30), we could calculate the ratio of the apparent  
 1780 equilibrium dissociation constants to be:

$$1781 \quad \frac{K_{d, Antp}^{long linker}}{K_{d, Antp}^{short linker}} = \frac{[DNA_s]_{free}^{long linker} \cdot 76.13}{[DNA_s]_{free}^{short linker} \cdot 32.52} = 2.34 \cdot \frac{([DNA]_0 - [(DNA-Antp-eGFP)_s]_{long linker})}{([DNA]_0 - [(DNA-Antp-eGFP)_s]_{short linker})} =$$

$$1782 \quad 2.34 \frac{[DNA]_0 - 13.67}{[DNA]_0 - 15.62} \quad (S31).$$

1783 Therefore:

$$1784 \quad K_{d, Antp}^{long linker} > 2.34 \cdot K_{d, Antp}^{short linker} \quad (S32),$$

1785 independently of the total concentration of Antp binding sites in the nucleus. For  
 1786  $[DNA]_0$  tending to  $15.62 nM$  ( $[DNA]_0 \rightarrow 15.62 nM$ ) with  $[DNA]_0 > 15.62 nM$ , the ratio  
 1787 of the apparent equilibrium dissociation constants will be high:

$$1788 \quad \lim_{[DNA]_0 \rightarrow 15.62} \left( 2.34 \frac{[DNA]_0 - 13.67}{[DNA]_0 - 15.62} \right) = +\infty \quad (S33),$$

1789 indicating that the short linker isoform will bind the Antp binding sites with much  
 1790 higher affinity than the short linker isoform.

1791 In contrast, for considerably higher values of  $[DNA]_0$  ( $[DNA]_0 \rightarrow +\infty$ ), the ratio of  
 1792 apparent equilibrium dissociation constants will be:

$$\begin{aligned} 1793 \quad & \lim_{[DNA]_0 \rightarrow +\infty} \left( 2.34 \frac{[DNA]_0 - 13.67}{[DNA]_0 - 15.62} \right) = \\ 1794 \quad & \lim_{[DNA]_0 \rightarrow +\infty} \left( 2.34 \frac{[DNA]_0 \left( 1 - \frac{13.67}{[DNA]_0} \right)}{[DNA]_0 \left( 1 - \frac{15.62}{[DNA]_0} \right)} \right) = \lim_{[DNA]_0 \rightarrow +\infty} \left( 2.34 \frac{1 - \frac{13.67}{[DNA]_0}}{1 - \frac{15.62}{[DNA]_0}} \right) = 2.34 \quad (\text{S34}), \end{aligned}$$

1795 indicating a roughly 2.5fold higher affinity of the short linker repressive isoform. This  
1796 means that, with decreasing total amounts of available Antp binding sites, the short  
1797 linker repressing Antp isoform will bind with even higher affinity than its long linker  
1798 counterpart.

#### 1799 Supplement 4: Stochastic modeling of Antennapedia expression

1800 In the following, we develop a simple mathematical model that is able to  
1801 explain the behavior of Antennapedia (Antp) expression at early and late  
1802 developmental stages. The Antp promoter is modeled as a continuous-time Markov  
1803 chain with three distinct transcriptional states. In the absence of Antp, the promoter  
1804 is in an unbound state (“U”), in which transcription is inactive. From this state, the  
1805 promoter can switch to a transcriptionally active state “A” at a rate, assumed to be  
1806 proportional to the concentration of the long-linker, activating isoform of Antp.  
1807 Analogously, repression of the promoter by the short-linker isoform of Antp is  
1808 modeled by an additional transcriptionally weak state “R”, which can be reached  
1809 from state “U” at a rate proportional to the concentration of that isoform. The  
1810 corresponding reverse transitions from states “R” and “A” back into state “U” are  
1811 assumed to happen at a constant rate  $k$ . Since the activating isoform can potentially  
1812 also repress the promoter, we assume that state “R” can be reached also from the  
1813 active state “A”. Similarly, we model a potential link also in the reverse direction from  
1814 state “A” to “R”. Depending on the model variant, we assume this transition happens  
1815 either at a constant rate  $k$  (competitive promoter model) or at a rate proportional to

1816 the concentration of the repressing isoform of Antp (non-competitive promoter  
1817 model). In the latter case, repression through short-linker isoforms can take place  
1818 even if a long-linker isoform is already bound to the promoter. As we have  
1819 demonstrated in Figure 5 A and B, the two model variants yield qualitative  
1820 differences in Antp expression. For the sake of illustration, the following description  
1821 focuses on the non-competitive model variant but we remark that the competitive  
1822 model can be derived analogously.

1823 At a particular time point  $t$ , the transcription rate of Antp is determined by the  
1824 current state of the promoter, i.e.,  $\lambda(t) \in \{0, \lambda_A, \lambda_B\}$ , with  $\lambda_A$  and  $\lambda_B$  as the transcription  
1825 rates associated with states “A” and “R”, respectively. In line with our experimental  
1826 findings, we assume that transcripts are spliced into the activating and repressing  
1827 isoforms at different rates  $\rho_A$  and  $\rho_R$ , respectively. This allows us to capture the  
1828 imbalance between the two isoforms that was revealed by our FCS data. The overall  
1829 expression rates for the two isoforms of Antp are then given by  $h_A(t) = \lambda(t)Z\rho_A$  and  
1830  $h_R(t) = \lambda(t)Z\rho_R$ , whereas  $Z$  is a random variable that accounts for extrinsic  
1831 variability in gene expression rates (Zechner et al., 2012). In all of our analyses, we  
1832 model  $Z$  as a Gamma random variable, i.e.,  $Z \sim \Gamma(\alpha, \beta)$  with  $\alpha$  and  $\beta$  as shape and  
1833 inverse scale parameters of that distribution. In summary, we describe the auto-  
1834 regulatory circuit of Antp expression by a stochastic reaction network of the form:

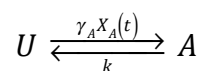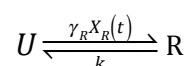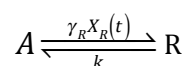

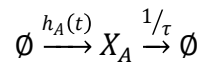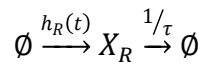

1835 (S35),

1836 with  $X_A(t)$  and  $X_R(t)$  as the concentration of the activating and repressing isoforms of  
 1837 Antp and  $\tau$  as the protein half-life. The initial conditions  $X_A(0)$  and  $X_R(0)$  were drawn  
 1838 randomly in accordance with our concentration measurements at early stages. In  
 1839 particular, we assume that the total amount of Antp  $X_{tot}$  in each cell is drawn from a  
 1840 negative binomial distribution such that  $X_{tot} \sim NB(r, p)$ , with  $r$  and  $p$  as the  
 1841 parameters characterizing this distribution. The total number of Antp molecules was  
 1842 then randomly partitioned into fractions of repressing and activating isoforms  
 1843 according to a Beta distribution. More specifically, we set  $X_A(0) = WX_{tot}$  and  
 1844  $X_R(0) = (1 - W)X_{tot}$  with  $W \sim Beta(a, b)$ . The parameters  $r$ ,  $p$ ,  $a$  and  $b$  were chosen  
 1845 based on our experimental data (see Table 1).

1846 Due to the fact that Antp expression takes place at the timescale of hours, we can  
 1847 further simplify our model from (S35). In particular, we can make use of a quasi-  
 1848 steady state assumption (Rao and Arkin, 2003), taking into consideration that  
 1849 promoter switching due to binding and unbinding of the different Antp isoforms  
 1850 occurs at a much faster timescale than production and degradation of Antp. As a  
 1851 consequence, we can replace the stochastic gene expression rates of the two  
 1852 isoforms by their expected value, whereas the expectation is taken with respect to  
 1853 the quasi-stationary distribution of the three state promoter model. More precisely,  
 1854 we have:

$$h_A(t) \approx \mathbb{E}[\lambda(t)]Z\rho_A$$



$$h_R(t) \approx \mathbb{E}[\lambda(t)]Z\rho_R$$

1855 (S36),

1856 with  $\mathbb{E}[\lambda(t)] = P_U 0 + P_A \lambda_A + P_R \lambda_R$  as the quasi-stationary probabilities of finding the  
 1857 promoter in state “U”, “A” and “R”, respectively. These probabilities can be derived  
 1858 from the generator matrix of the three-state promoter model, which reads:

$$1859 \quad Q = \begin{pmatrix} -\gamma_A X_A(t) - \gamma_R X_R(t) & k & k \\ \gamma_A X_A(t) & -k - \gamma_R X_R(t) & k \\ \gamma_R X_R(t) & \gamma_R X_R(t) & -2k \end{pmatrix} \text{ (S37).}$$

1860 Assuming that  $X_A(t)$  and  $X_R(t)$  remain roughly constant on the timescale of the  
 1861 promoter, the quasi-stationary distribution can be determined by the null-space of  $Q$ ,  
 1862 which in this case is given by:

$$1863 \quad P_{QSS} = \begin{pmatrix} P_U \\ P_A \\ P_R \end{pmatrix} = \begin{pmatrix} \frac{k}{(k + \gamma_A X_A(t) + \gamma_R X_R(t))} \\ \frac{k(2\gamma_A X_A(t) + \gamma_R X_R(t))}{(2k + \gamma_R X_R(t))(k + \gamma_A X_A(t) + \gamma_R X_R(t))} \\ \frac{\gamma_R X_R(t)}{2k + \gamma_R X_R(t)} \end{pmatrix} \text{ (S38).}$$

1864 Correspondingly, the expectation of  $\lambda(t)$  becomes:

$$\begin{aligned} \mathbb{E}[\lambda(t)] &= (0 \quad \lambda_A \quad \lambda_R) \begin{pmatrix} P_U \\ P_A \\ P_R \end{pmatrix} \\ &= \frac{\gamma_R X_R(t) \lambda_R}{2k + \gamma_R X_R(t)} + \frac{k \lambda_A (2\gamma_A X_A(t) + \gamma_R X_R(t))}{(2k + \gamma_R X_R(t))(k + \gamma_A X_A(t) + \gamma_R X_R(t))} \\ &:= \bar{\lambda}(X_A(t), X_R(t)) \text{ (S39).} \end{aligned}$$

1866 The simplified model of Antp expression can then be compactly written as:

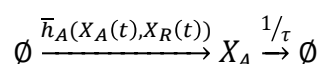

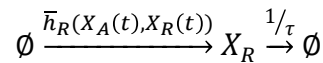

1867 (S40),

1868 with  $\bar{h}_A(X_A(t), X_R(t)) = \bar{\lambda}(X_A(t), X_R(t))Z\rho_A$  and  $\bar{h}_R(X_A(t), X_R(t)) = \bar{\lambda}(X_A(t), X_R(t))Z\rho_R$ .

1869 In all our simulation studies, the circuit from (S40) was simulated using the stochastic  
 1870 simulation algorithm (SSA) (Gillespie, 2007). In case of the perturbation experiments,  
 1871 small modifications to the model were made. In case of overexpressing either of the  
 1872 two isoforms, additional reactions of the form:

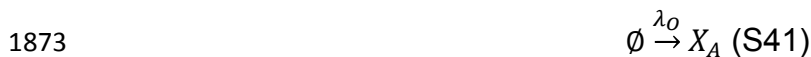

1874 and

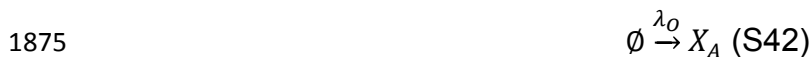

1876 were included in the model. To account for overexpression of an external repressor  
 1877  $S$ , we introduced a fourth state in the promoter model, from which no expression can  
 1878 take place. This state is assumed to be reachable from any of the other three states  
 1879 at a rate  $\gamma_S S$  with  $S$  as the concentration of the external repressor. The corresponding  
 1880 reaction rates of Antp expression were determined analogously to equations (S37-  
 1881 S39). Table 1 summarizes the parameters used for each of the simulation studies.

1882 Table 1: Parameters used for simulating the stochastic model of Antp expression

1883

| Parameter                 | $r$ | $p$ | $a$ | $b$ | $\tau$ | $k$      | $\gamma_A$ | $\gamma_R$ | $\lambda_A$ | $\lambda_R$ | $\alpha$ | $\beta$ | $\lambda_0$ | $\gamma_S$ | $S$ |
|---------------------------|-----|-----|-----|-----|--------|----------|------------|------------|-------------|-------------|----------|---------|-------------|------------|-----|
| Unit                      | –   | –   | –   | –   | $h$    | $s^{-1}$ | $s^{-1}$   | $s^{-1}$   | $s^{-1}$    | $s^{-1}$    | –        | –       | $s^{-1}$    | –          | –   |
| Figure 5 A,<br>D, E and F | 2.5 | 1.0 | 18  | 12  | $12^a$ | 100      | 0.25       | 1          | 10          | 0.1         | 3        | 0.33    | –           | –          | –   |

|                         |     |     |    |    |    |     |      |   |                  |     |   |      |    |   |     |
|-------------------------|-----|-----|----|----|----|-----|------|---|------------------|-----|---|------|----|---|-----|
| Figure 5 B              | 2.5 | 1.0 | 18 | 12 | 12 | 100 | 0.25 | 1 | 10               | 0.1 | 3 | 0.33 | —  | — | —   |
| Figure 5 C              | 2.5 | 1.0 | 18 | 12 | 12 | 100 | 0.25 | 0 | 0.5 <sup>b</sup> | —   | 3 | 0.33 | —  | — | —   |
| Figure 5 G <sup>c</sup> | 2.5 | 1.0 | 18 | 12 | 12 | 100 | 0.25 | 1 | 10               | 0.1 | 3 | 0.33 | 10 | — | —   |
| Figure 5 H <sup>d</sup> | 2.5 | 1.0 | 18 | 12 | 12 | 100 | 0.25 | 1 | 10               | 0.1 | 3 | 0.33 | 10 | — | —   |
| Figure 5 M              | 2.5 | 1.0 | 18 | 12 | 12 | 100 | 0.25 | 1 | 10               | 0.1 | 3 | 0.33 | 10 | 1 | 4e4 |

1884 <sup>a</sup>Experimentally determined value from (Dworkin et al., 2007).

1885 <sup>b</sup>The expression rate  $\lambda_A$  was chosen to achieve average Antp levels similar to those  
1886 of Figure 5 A (i.e., around 6000 molecules).

1887 <sup>c</sup>Overexpression of  $X_R$ .

1888 <sup>d</sup>Overexpression of  $X_A$ .

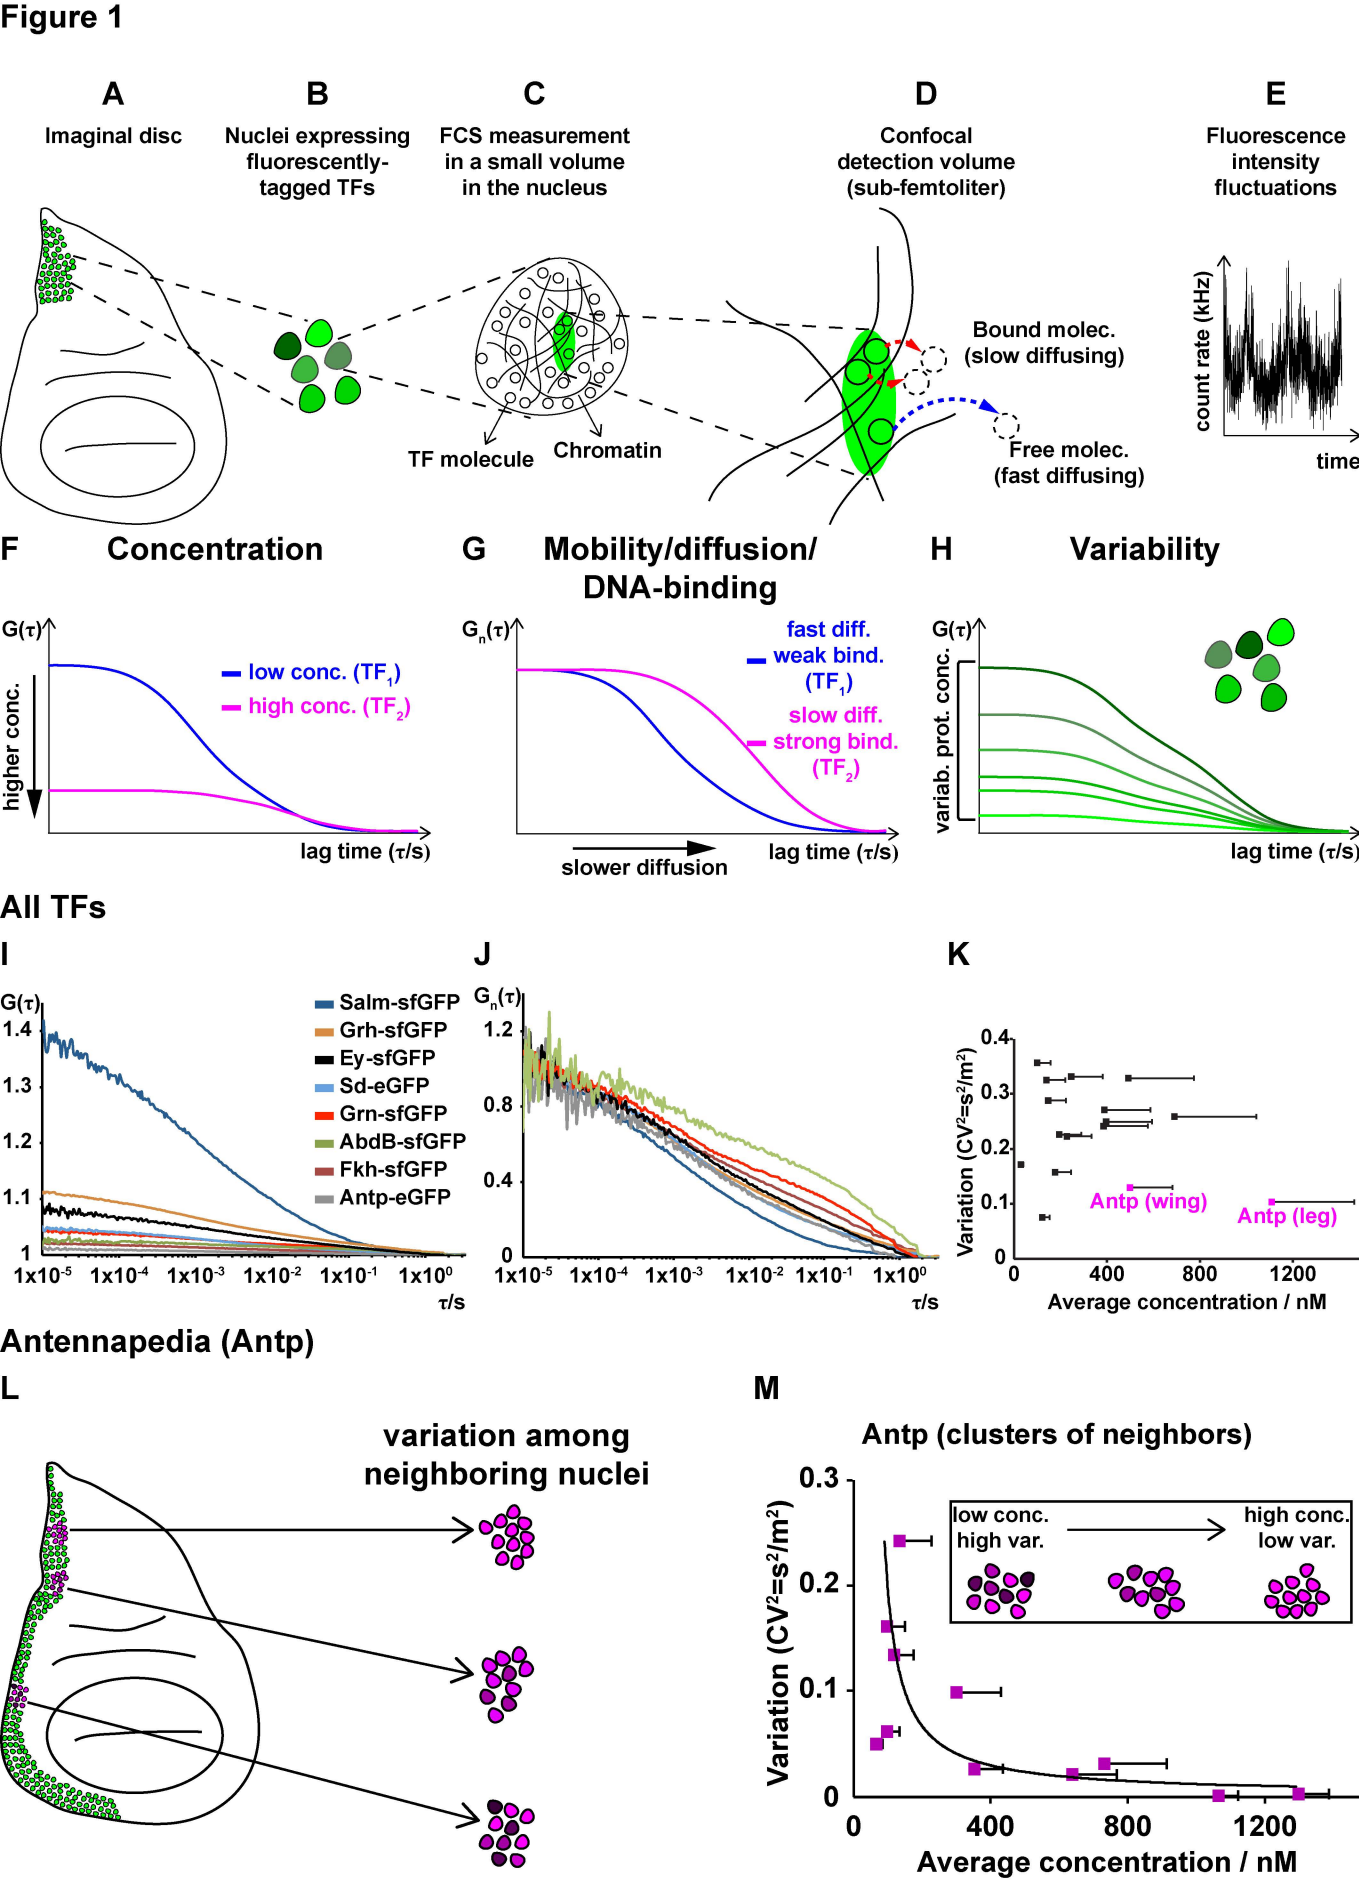

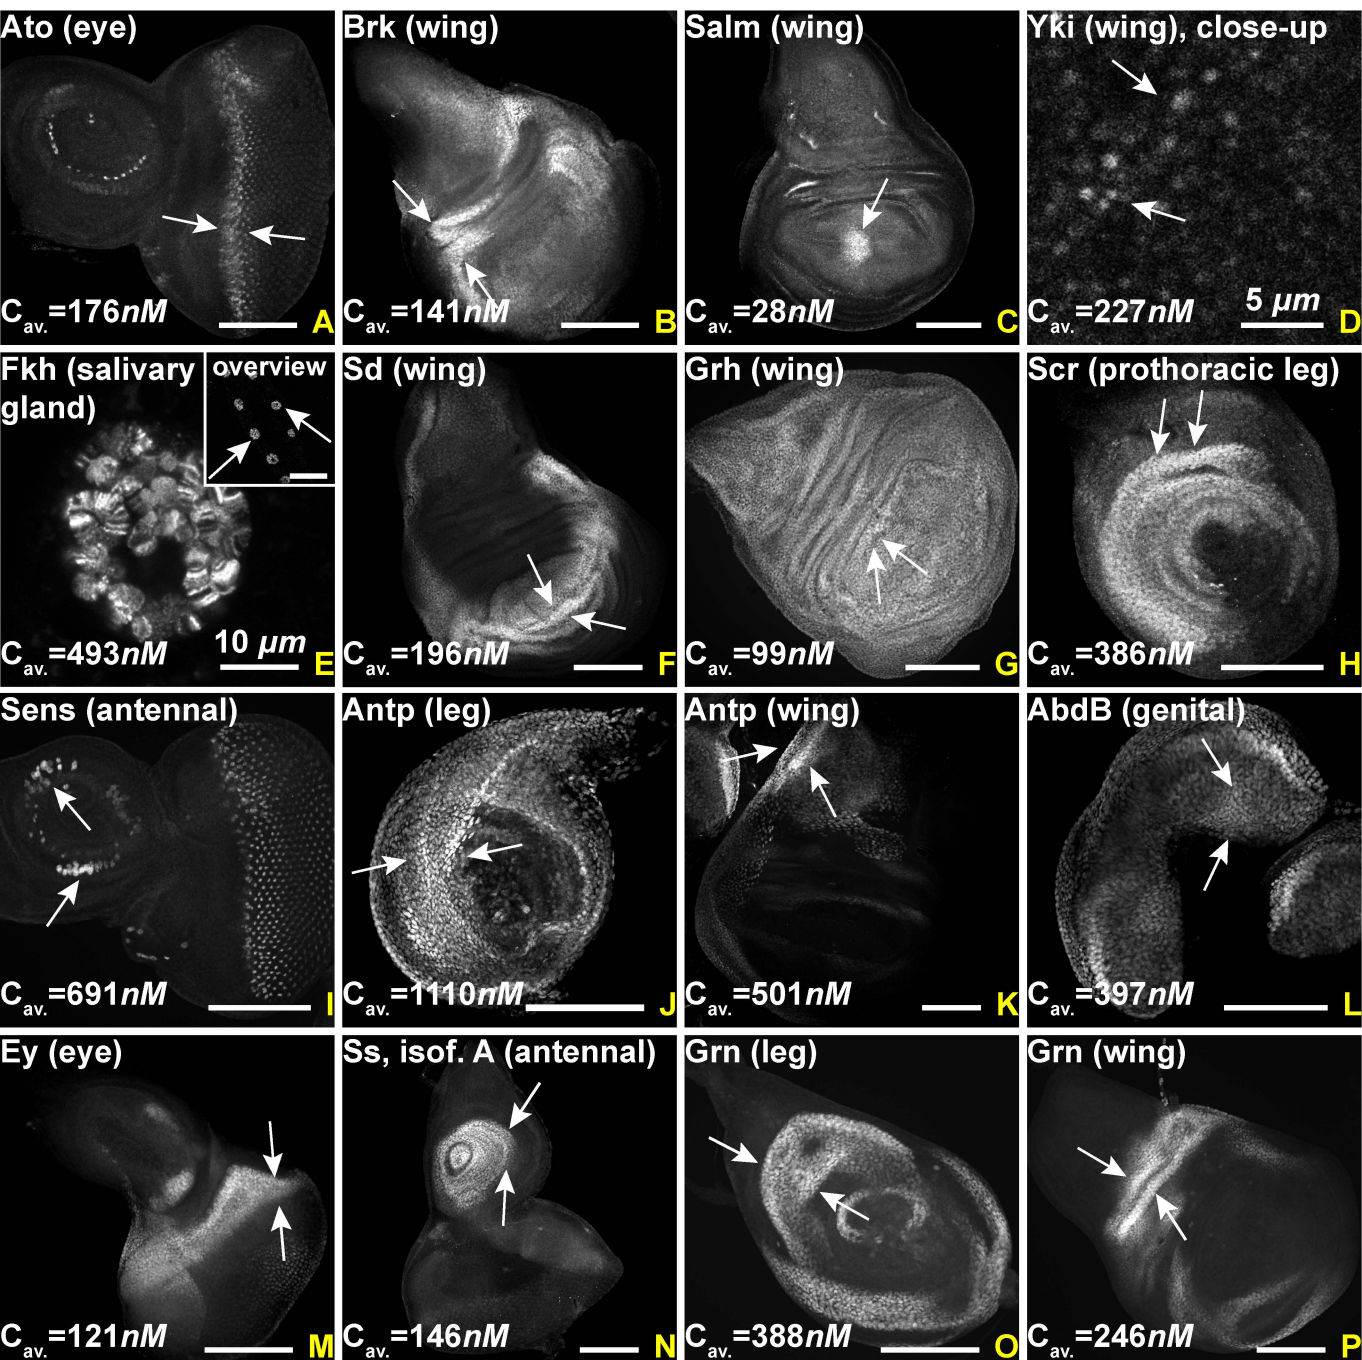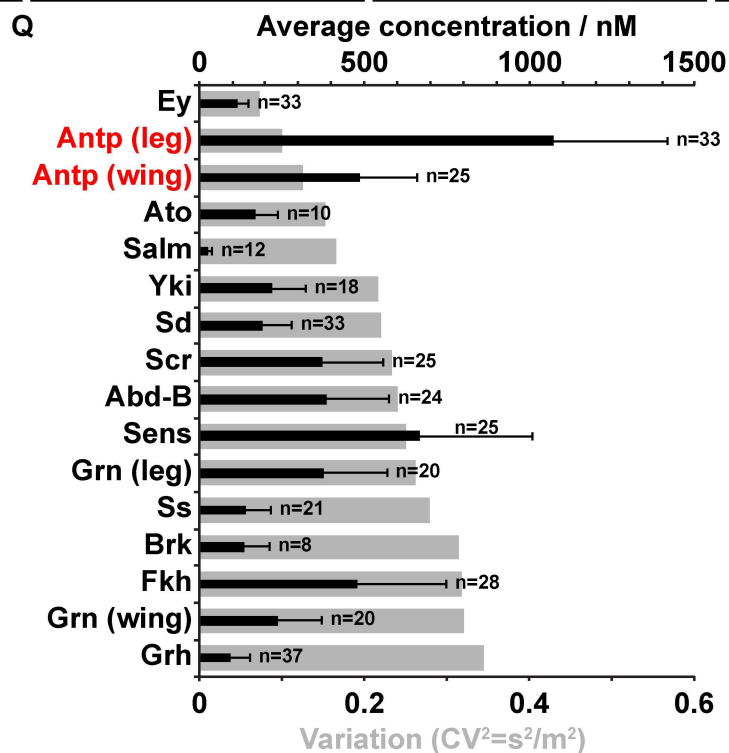

Figure 1 - figure supplement 2

**A**

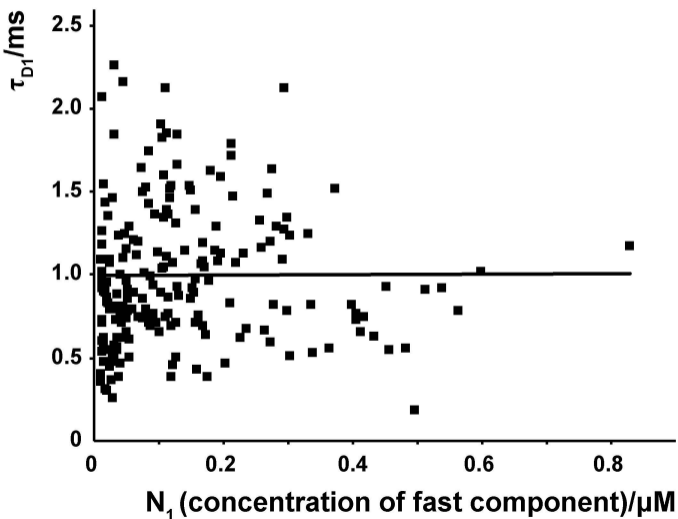

**B**

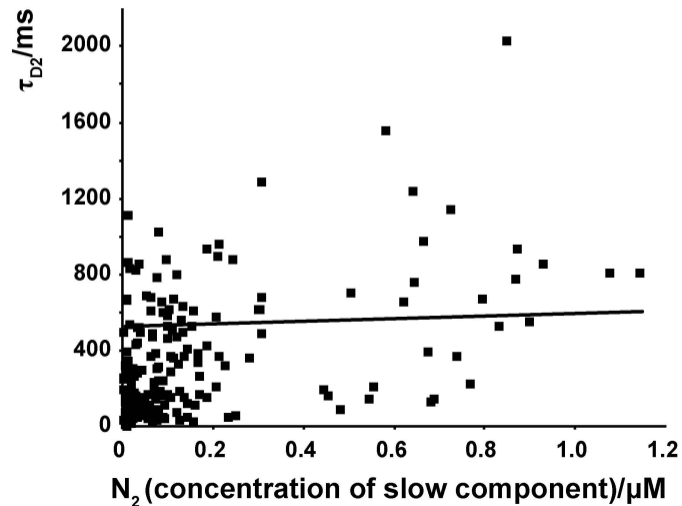



Figure 2

### Auto-repression: protein level

*Ay>SynthAntp-eGFP*

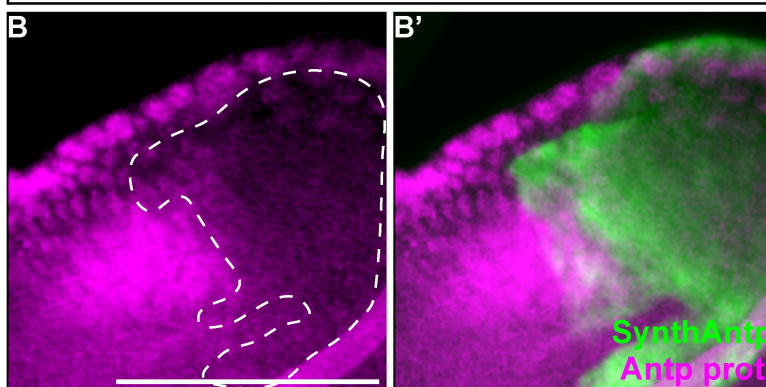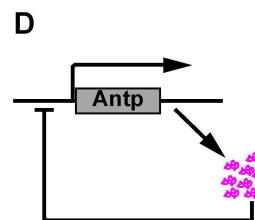

### Auto-repression: transcripts level

*Antp (P1)-lacZ, Ay>SynthAntp-eGFP*

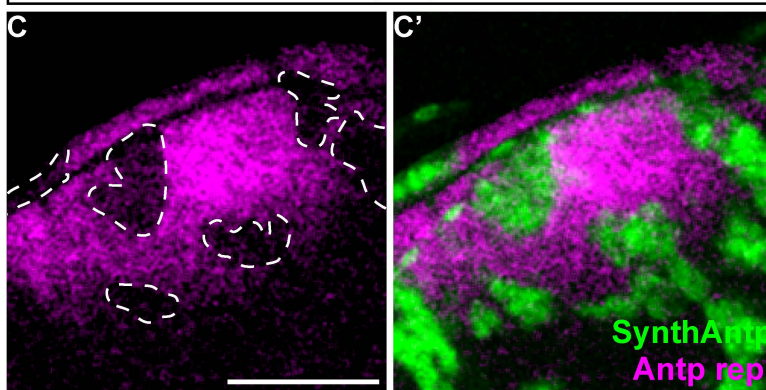

### Auto-activation: transcripts level

*Antp (P1)-lacZ, Dll (MD23)>SynthAntp-eGFP*

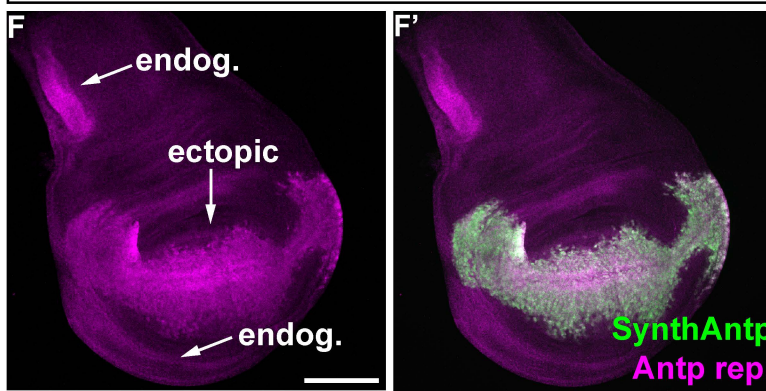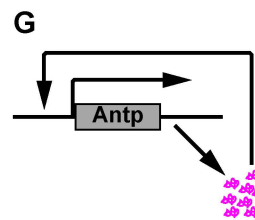

## Normal expression patterns (P1, P2 reporters and protein)

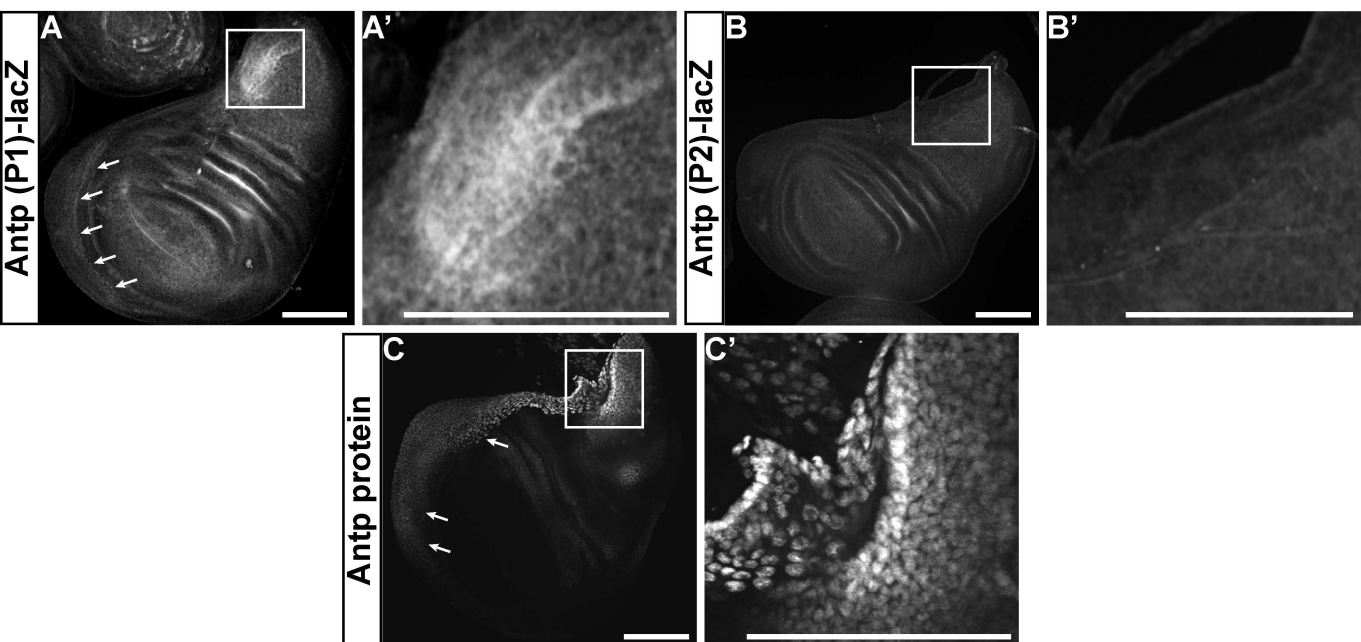

Protein repression (neg. control)

Transcripts repression (neg. control)

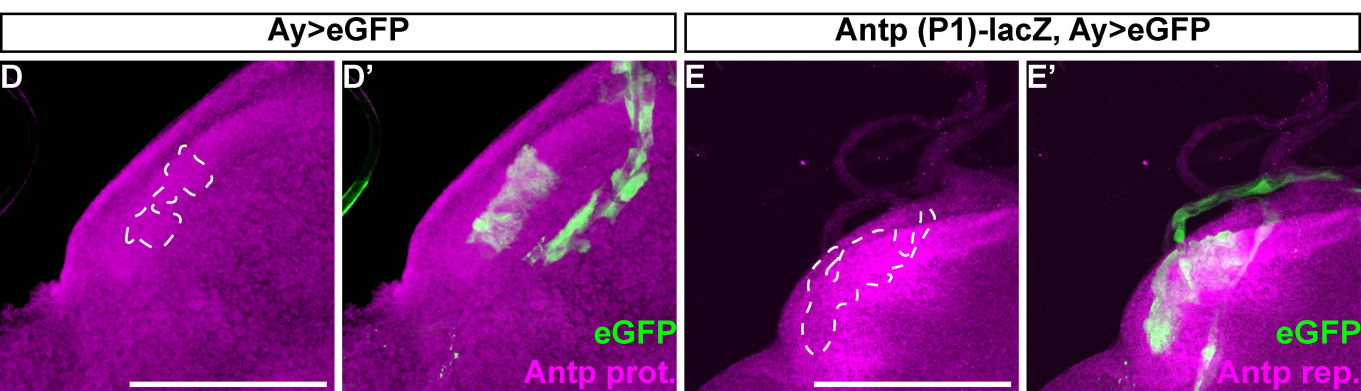

Transcripts repression: Antp-FL

Transcripts activation: Antp-FL

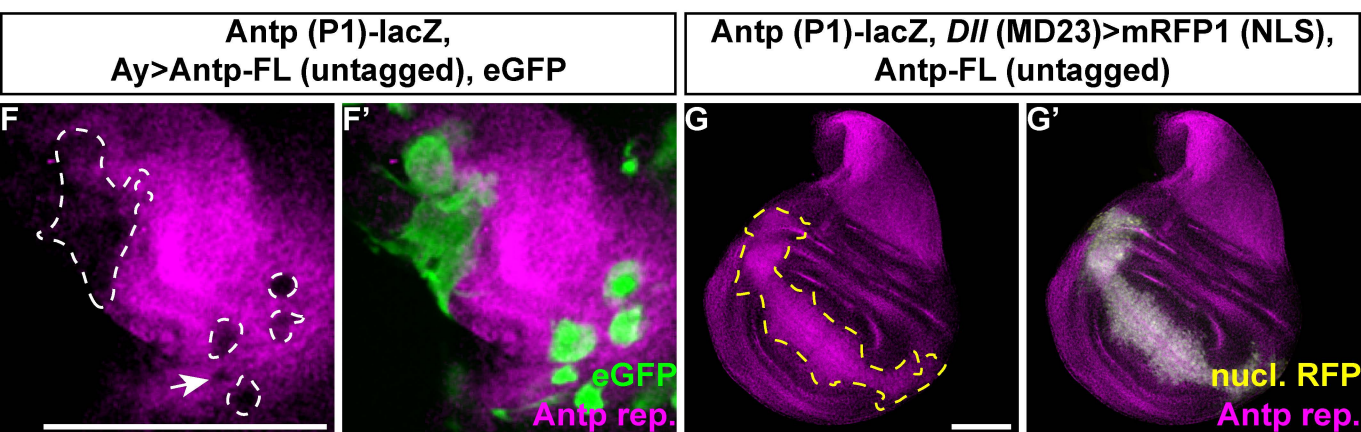

Transcripts activation (neg. control)

Antp (P1)-lacZ, Dll (MD23) &gt; mRFP1 (NLS)

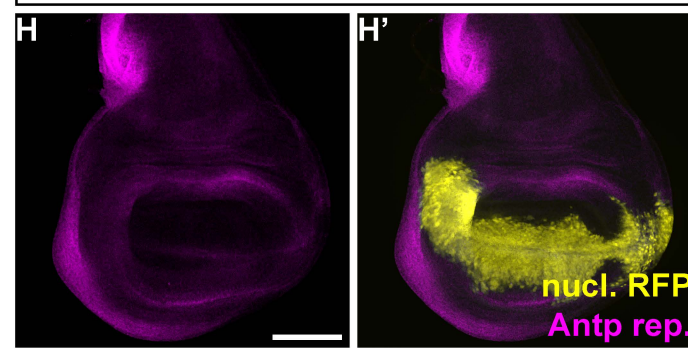



Figure 2 - figure supplement 2

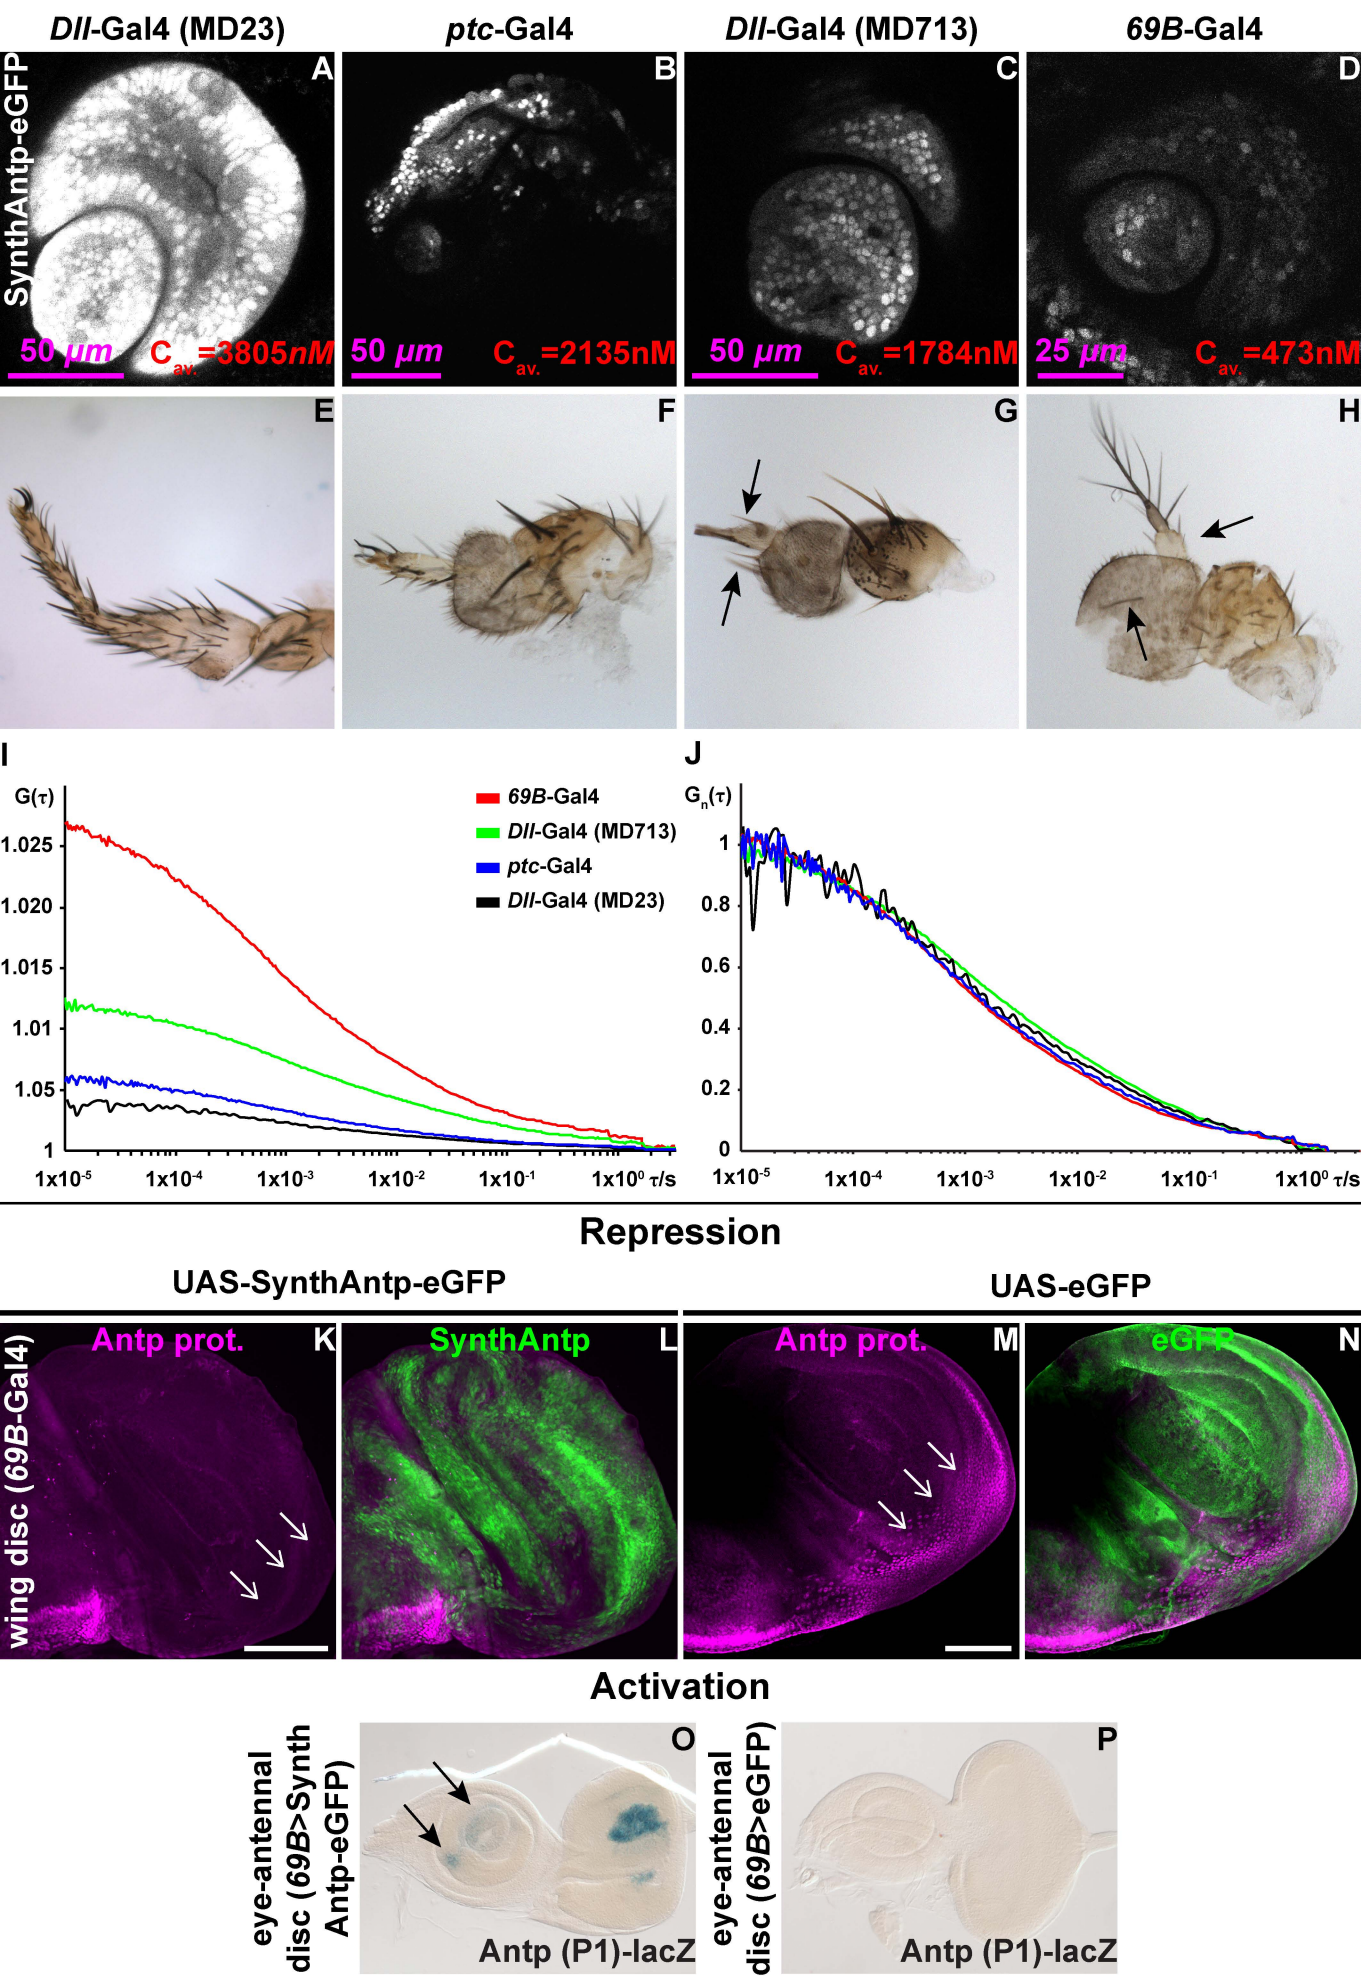

Figure 2 - figure supplement 3

## Endogenous versus overexpressed

A

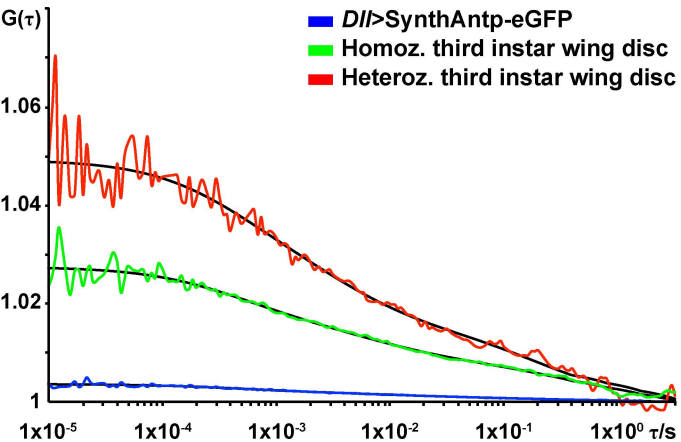

B

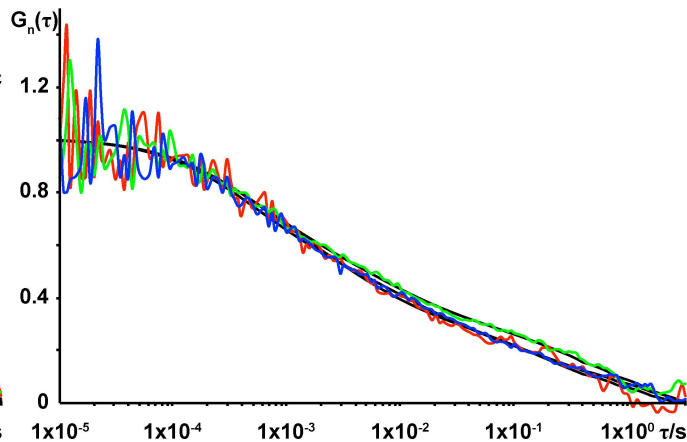

Figure 3

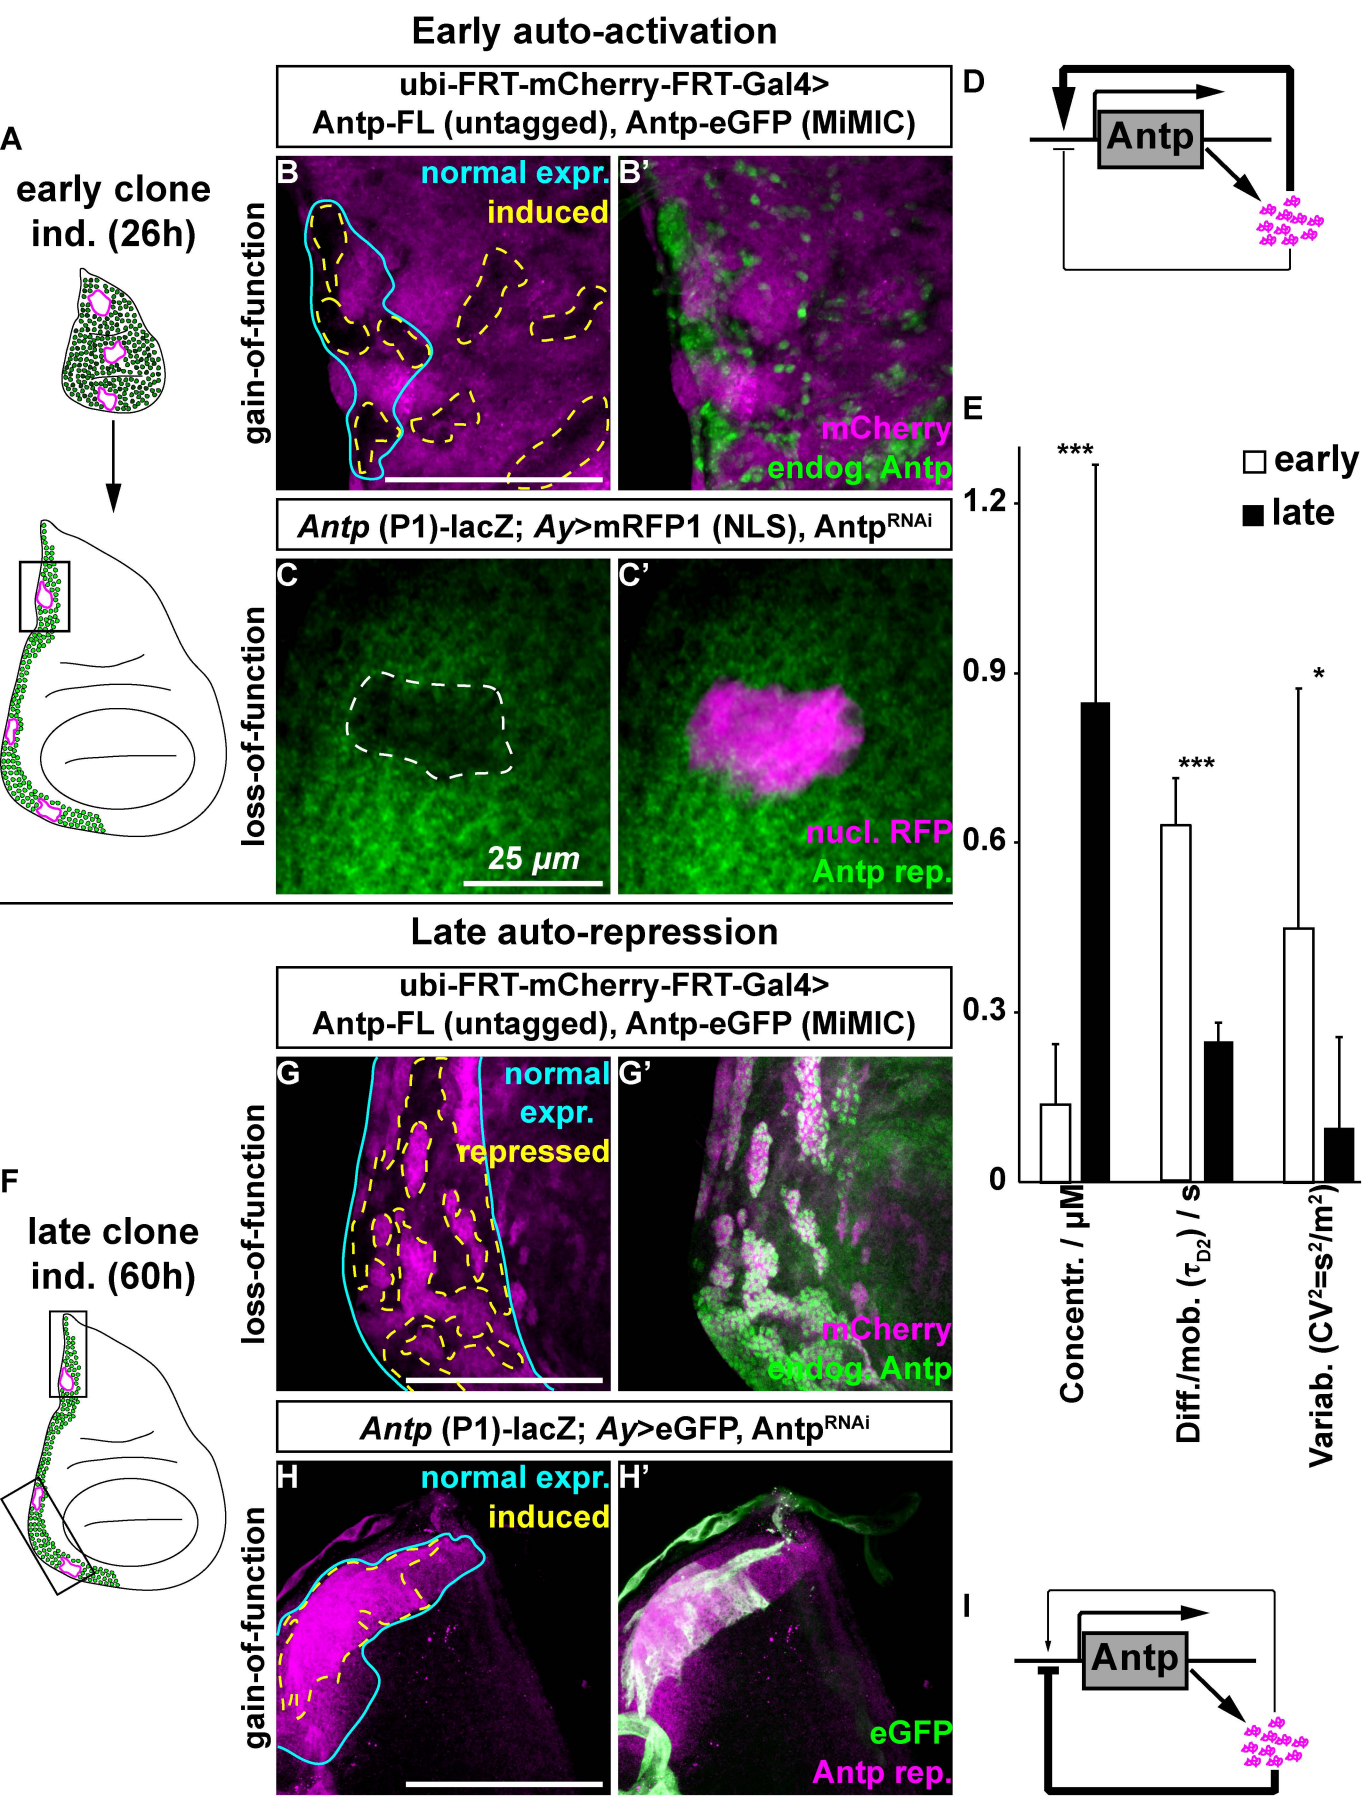



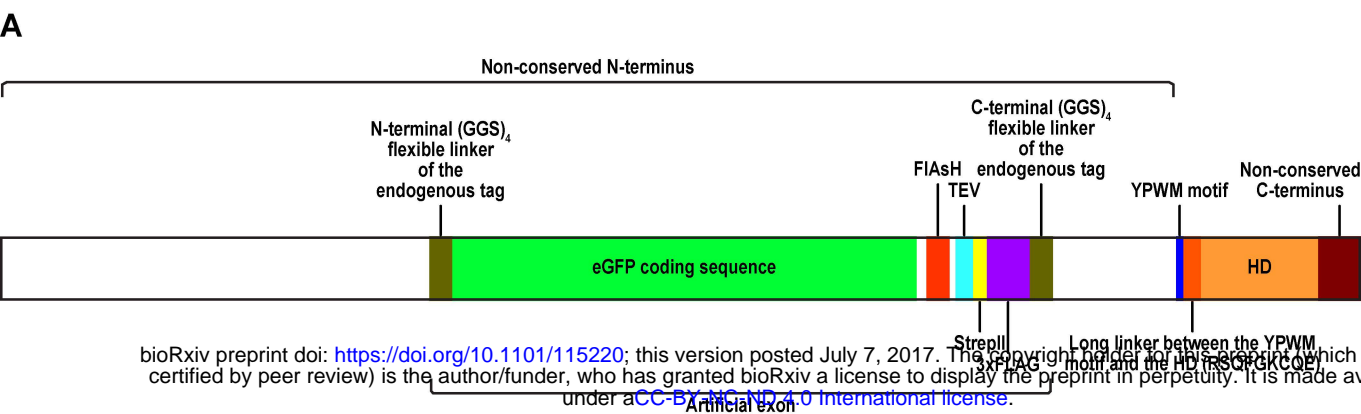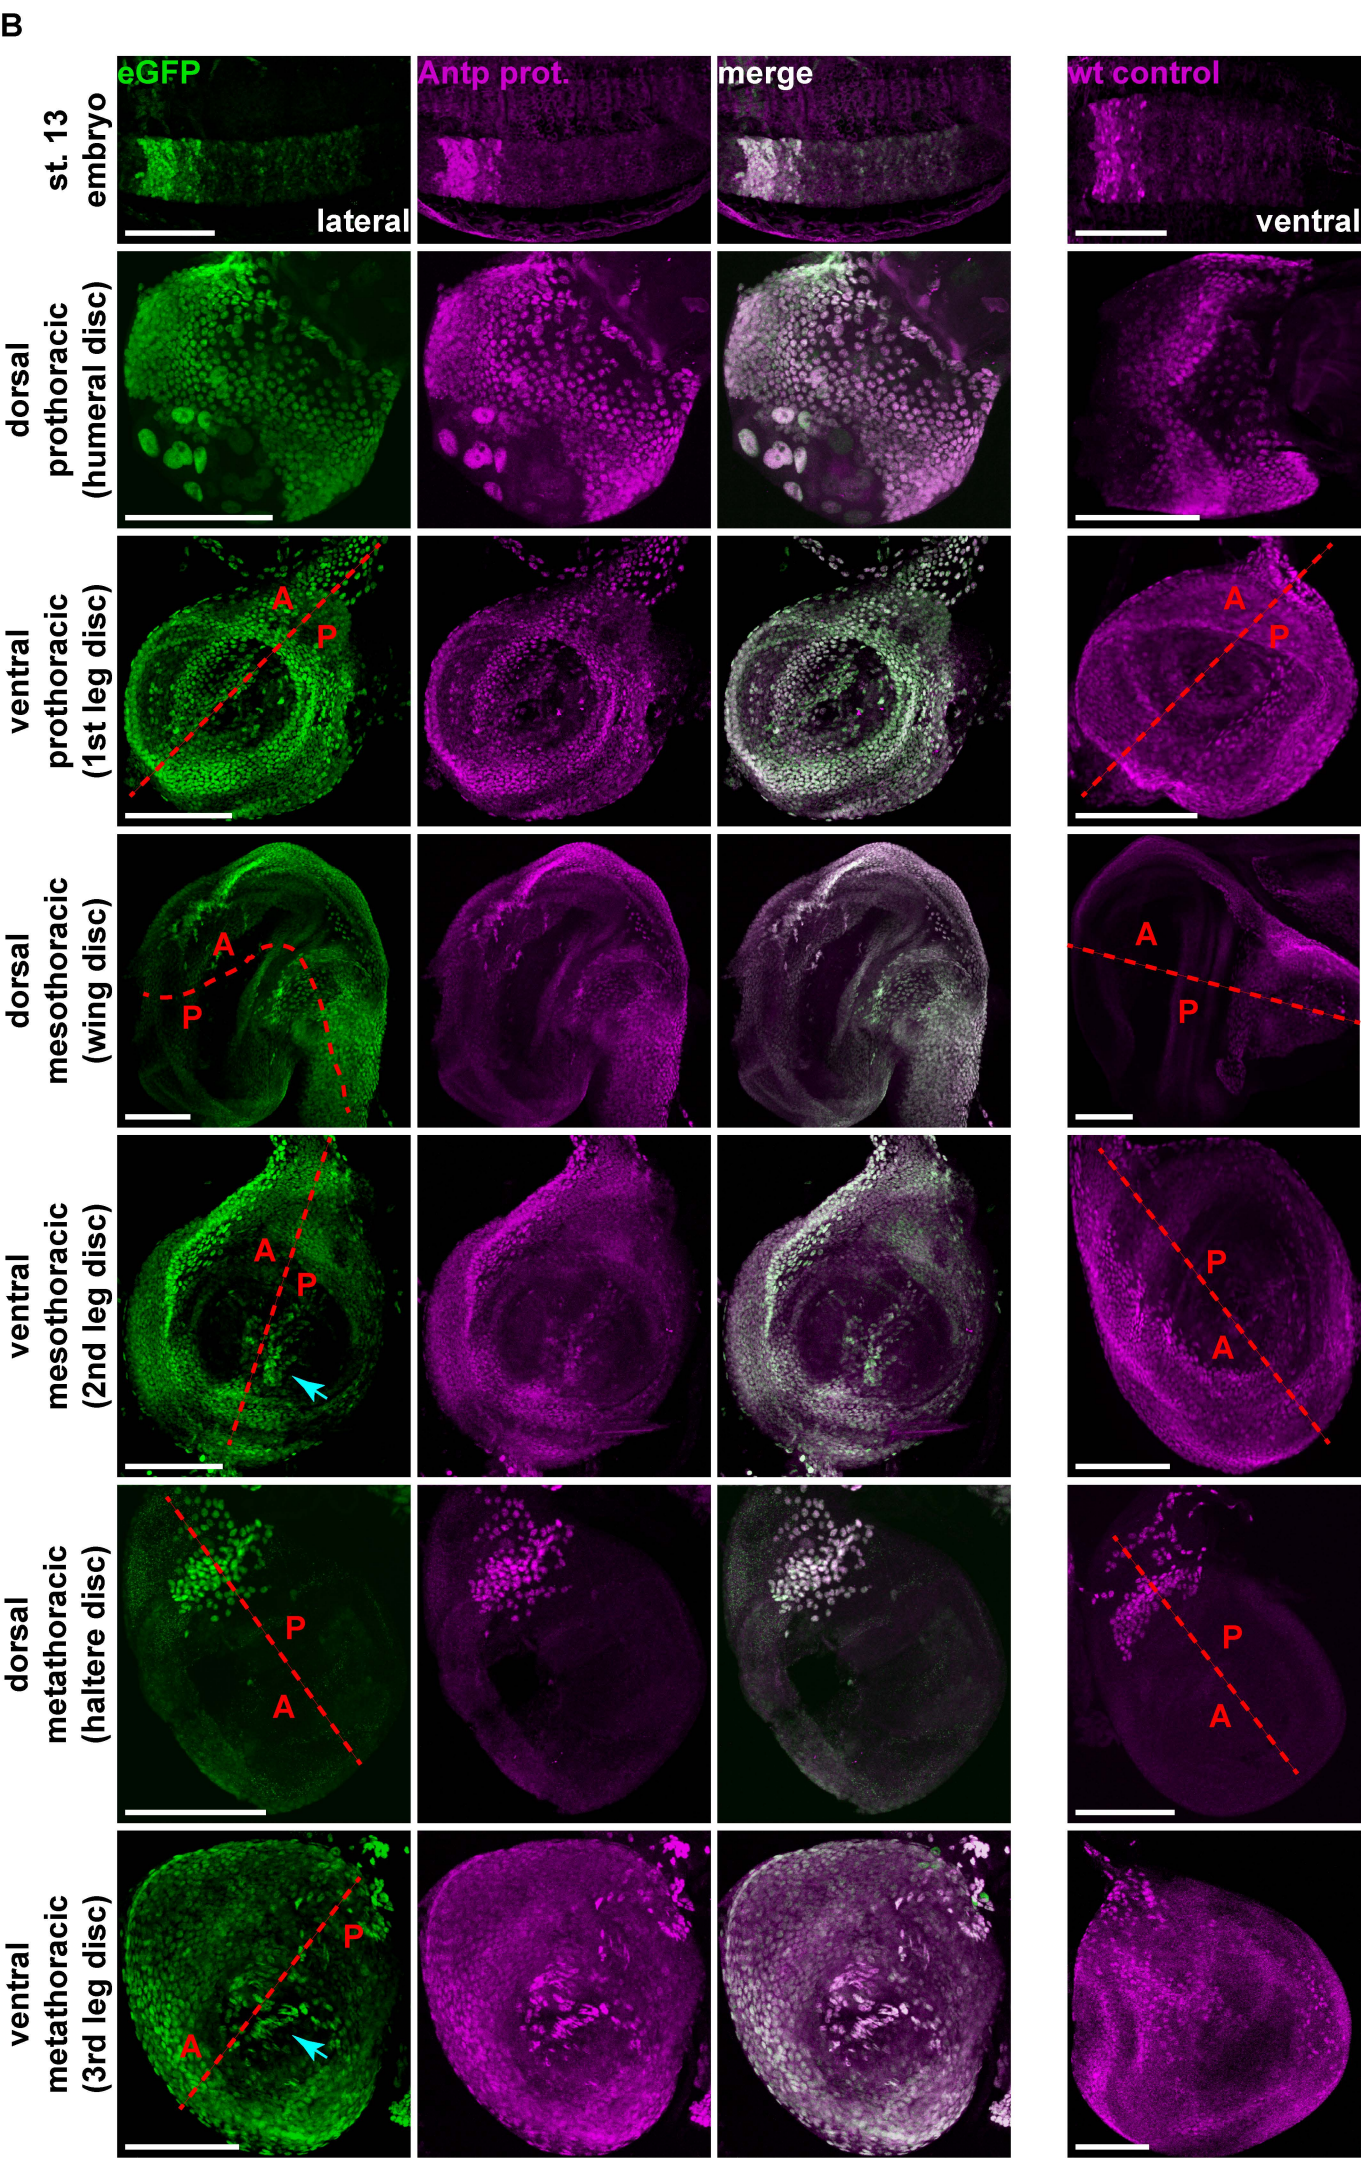



**Non-induction of overexpression clones**

ubi-FRT-mCherry-FRT-Gal4>  
Antp-FL (untagged), Antp-eGFP (MiMIC)

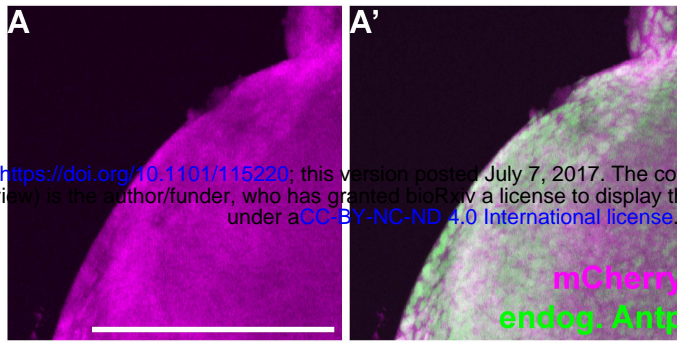

bioRxiv preprint doi: <https://doi.org/10.1101/115220>; this version posted July 7, 2017. The copyright holder for this preprint (which was not certified by peer review) is the author/funder, who has granted bioRxiv a license to display the preprint in perpetuity. It is made available under aCC-BY-NC-ND 4.0 International license.

**Induction of non-overexpressing clones**

**Early**

**Late**

ubi-FRT-mCherry-FRT-Gal4, Antp-eGFP (MiMIC)

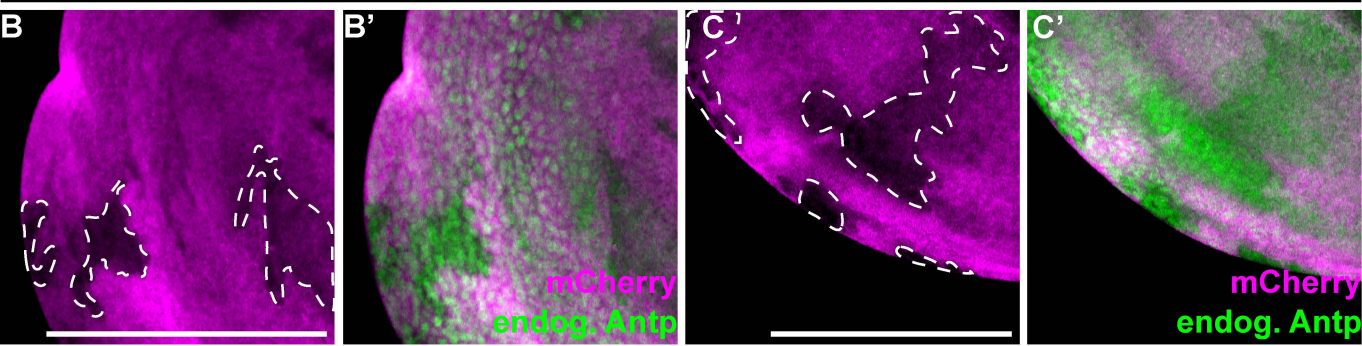

**Transcripts activation early**

**Antp-FL**

**SynthAntp**

Antp (P1)-lacZ,  
Ay>Antp-FL (untagged), eGFP

Antp (P1)-lacZ, Ay>SynthAntp-eGFP

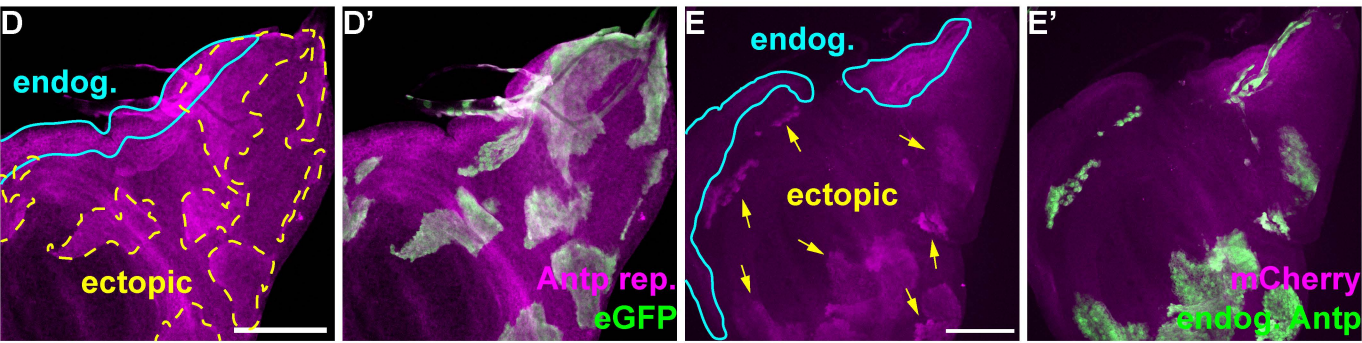

**Activation early (neg. control)**

**Protein**

**Transcripts**

Ay>eGFP

Antp (P1)-lacZ, Ay>eGFP

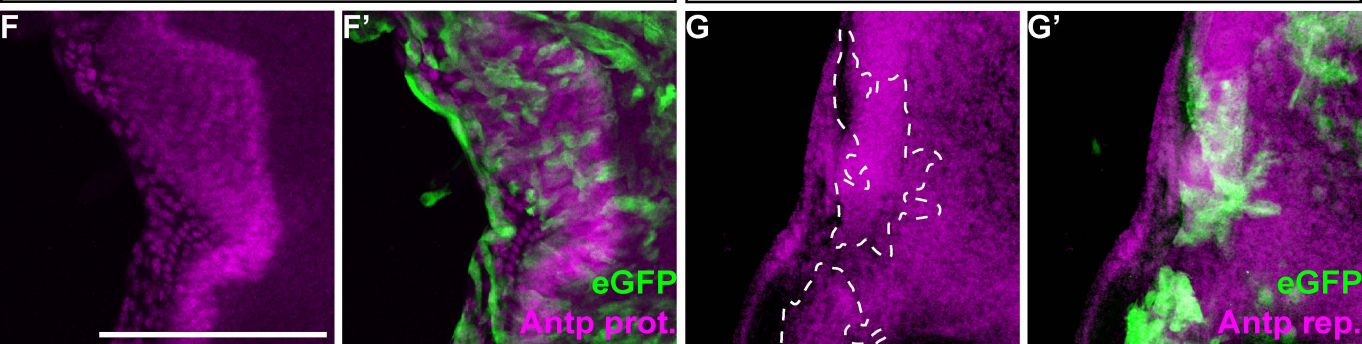

**Functionality of the Antp<sup>RNAi</sup> line**

Antp-eGFP (MiMIC); Ay>mRFP1 (NLS),  
Antp-RNAi

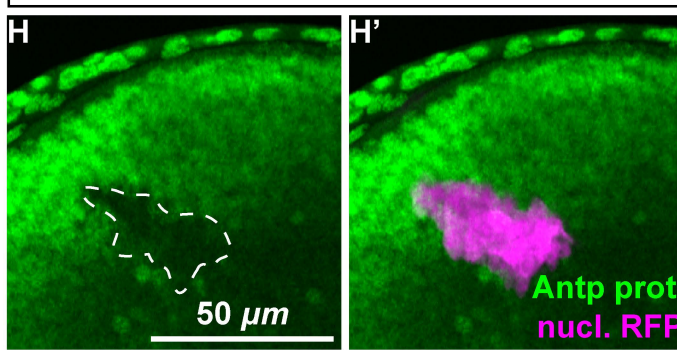

Figure 3 - figure supplement 3

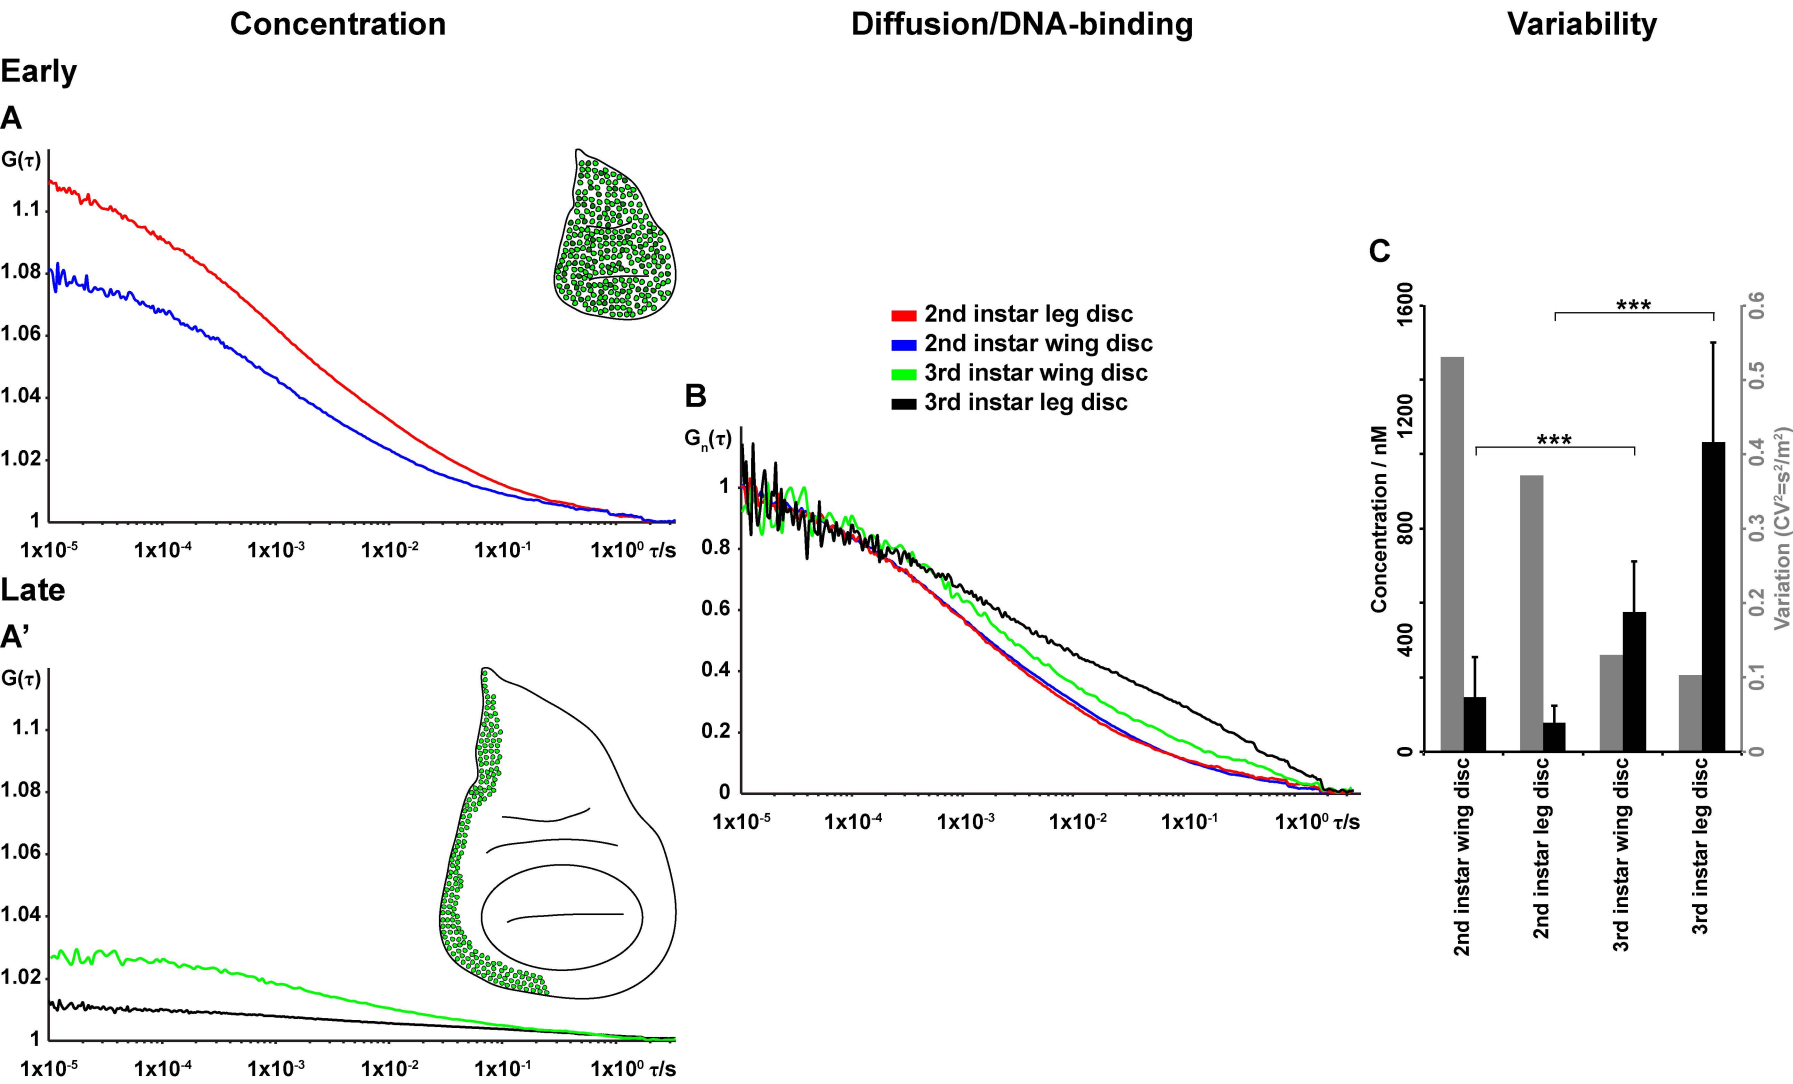



Figure 4

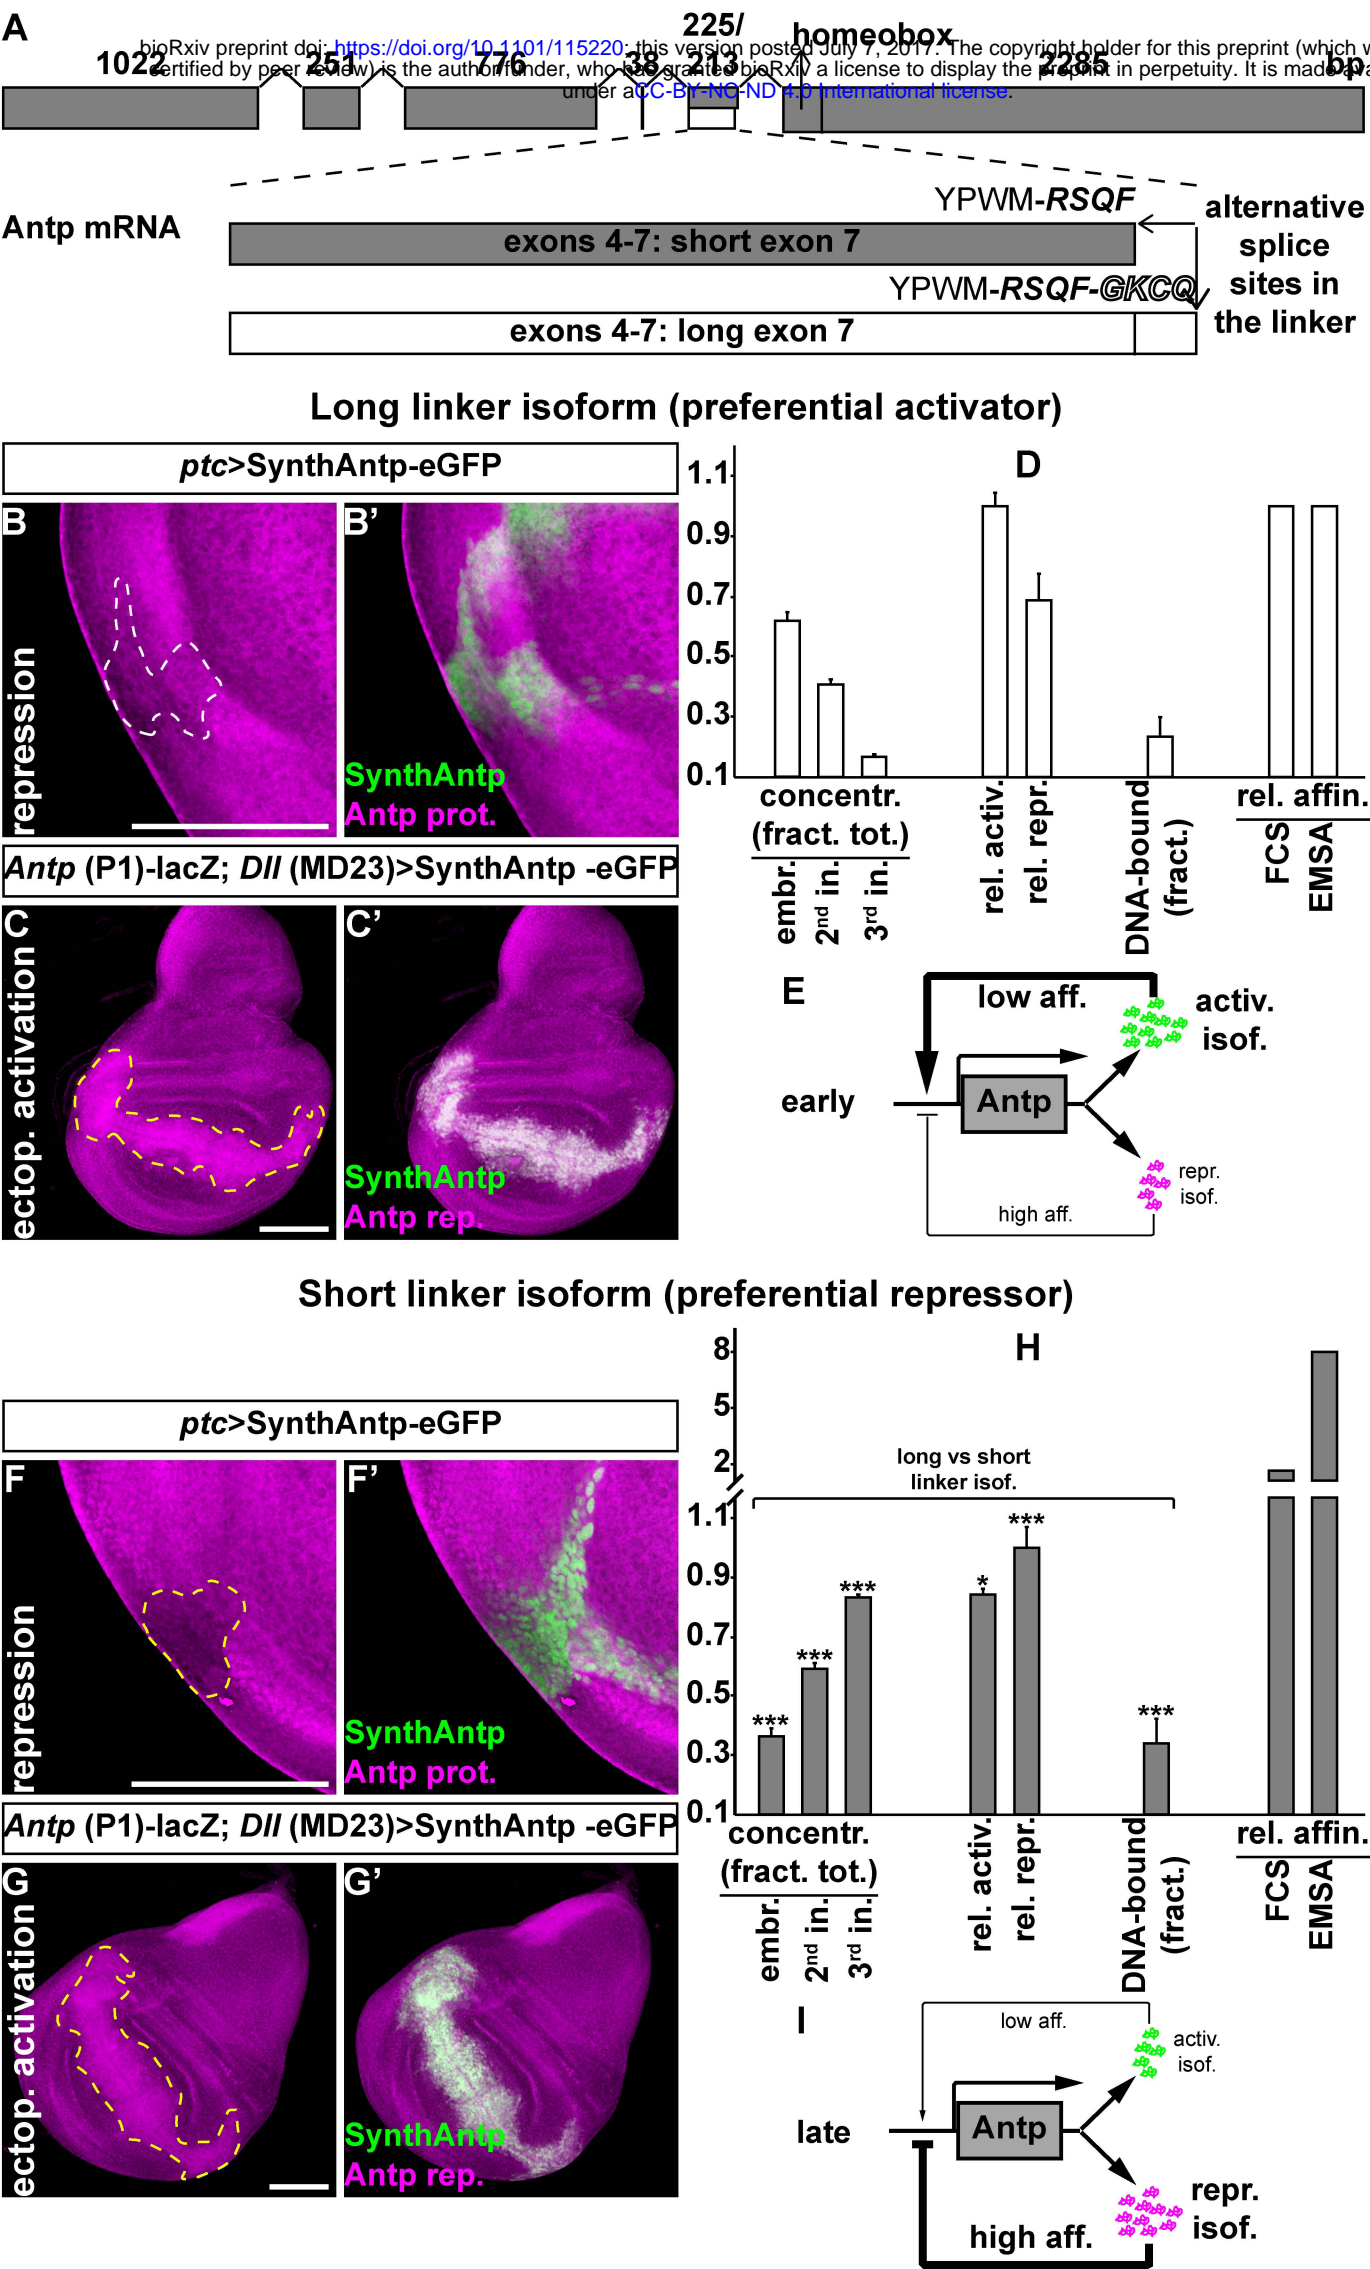



Late repression by SynthAntp (short isof.)

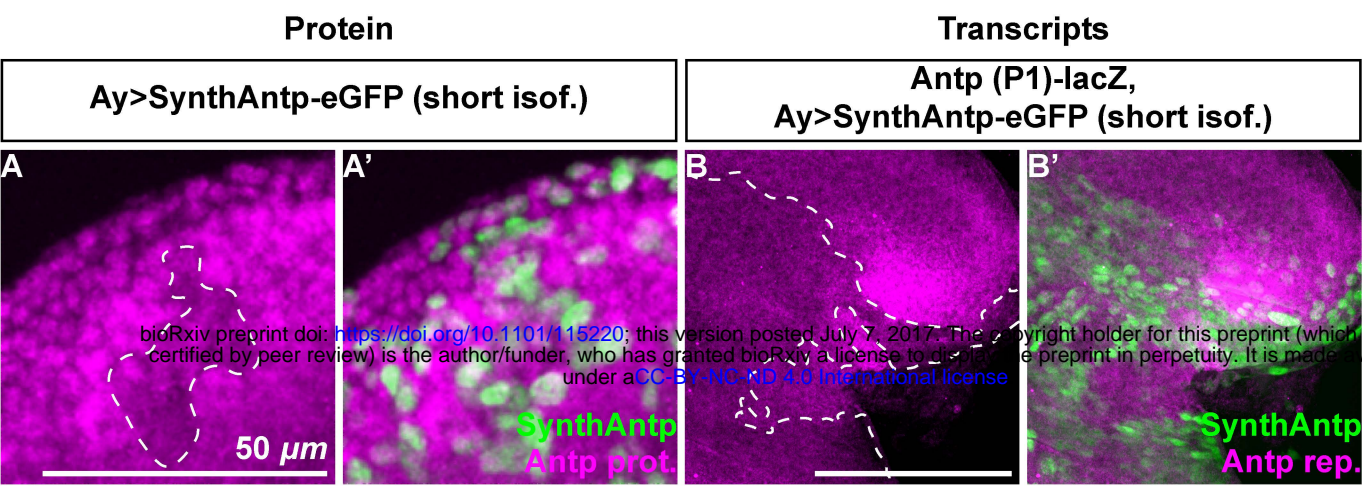

Late repression by Antp-FL (short isof.)

Activation by Antp-FL (short isof.)

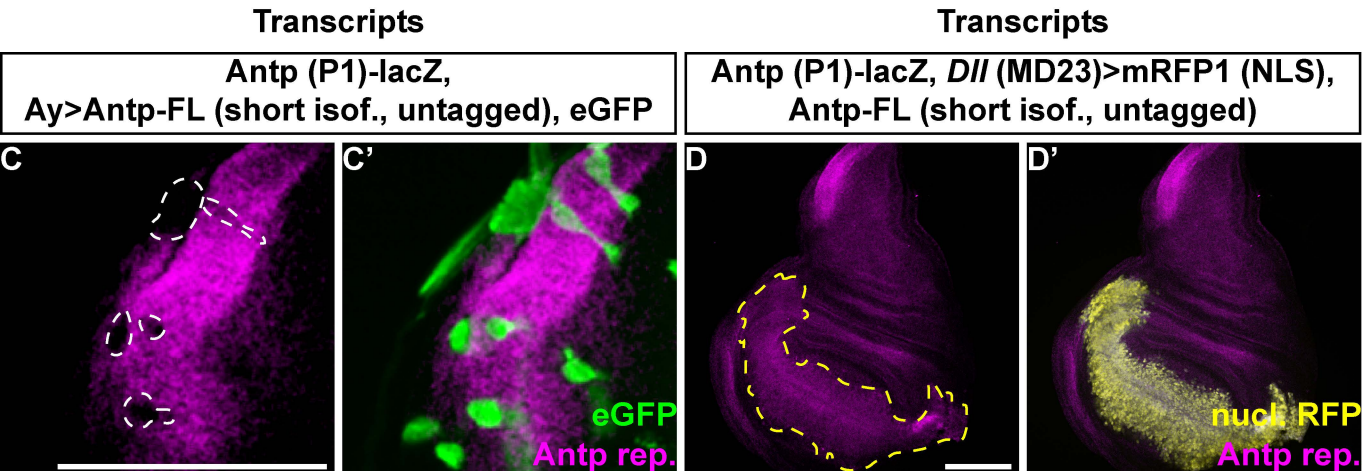

Activation and repression of end. protein by Antp-FL (short isof.)

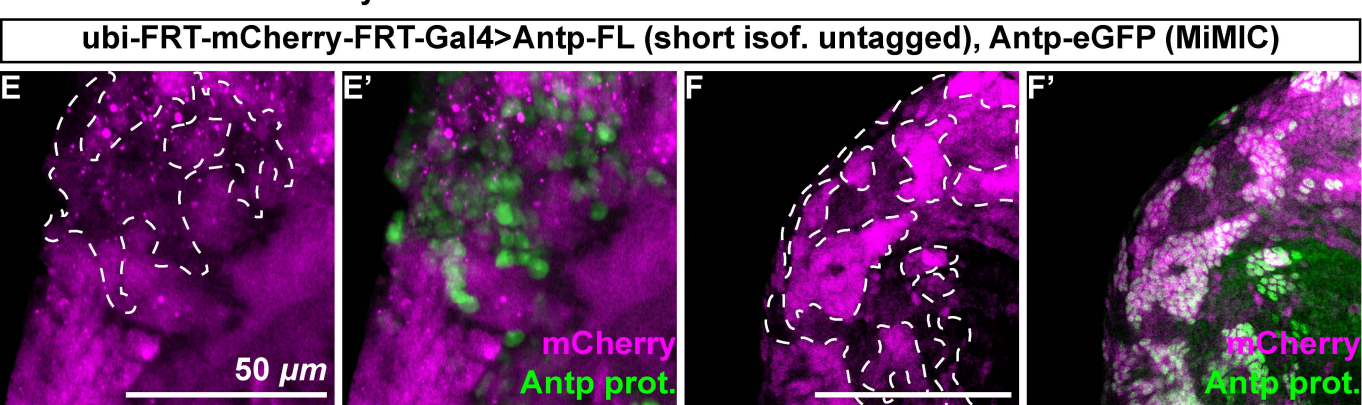

Early activation of transcripts by SynthAntp and Antp-FL (short isof.)

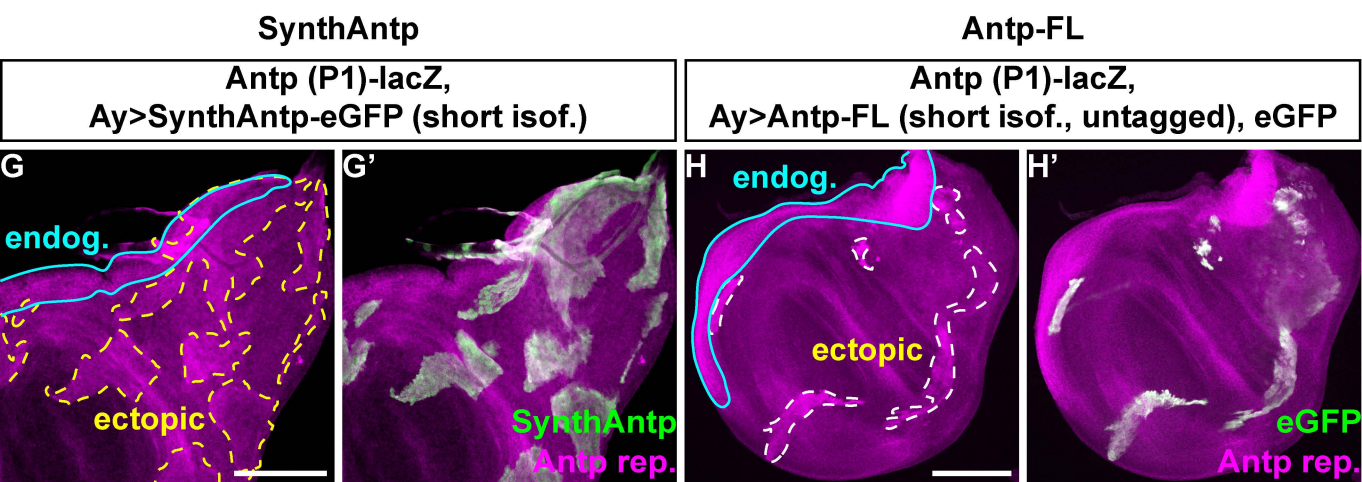

Repression of transcripts by long and short isoforms

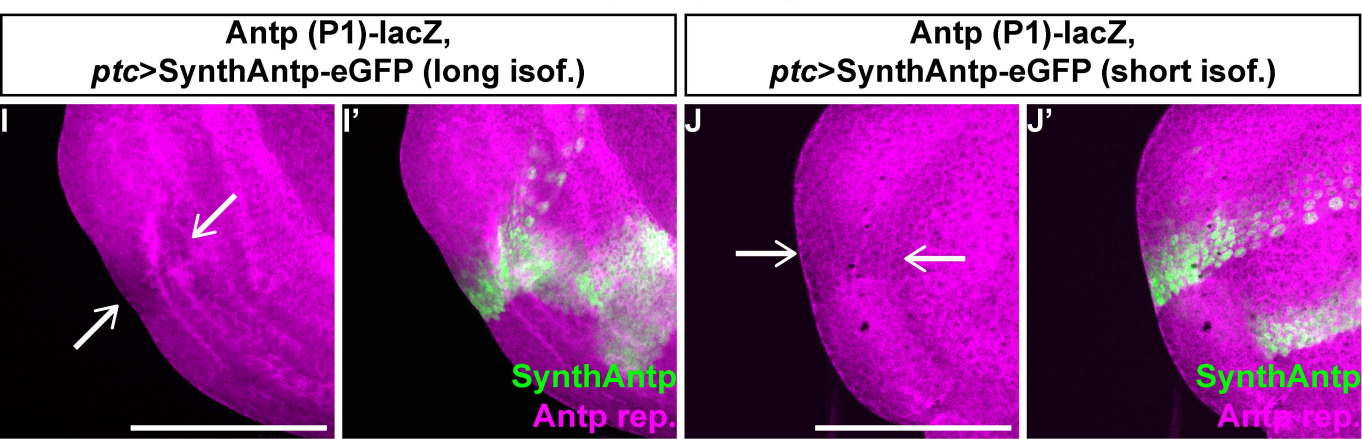



Figure 4 - figure supplement 2

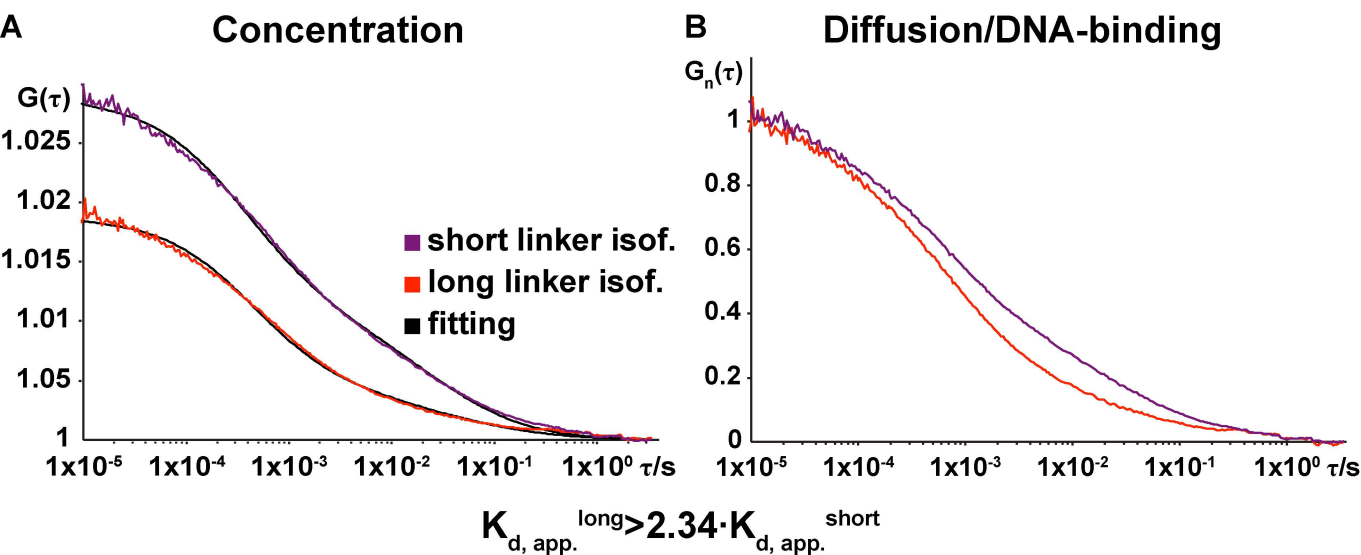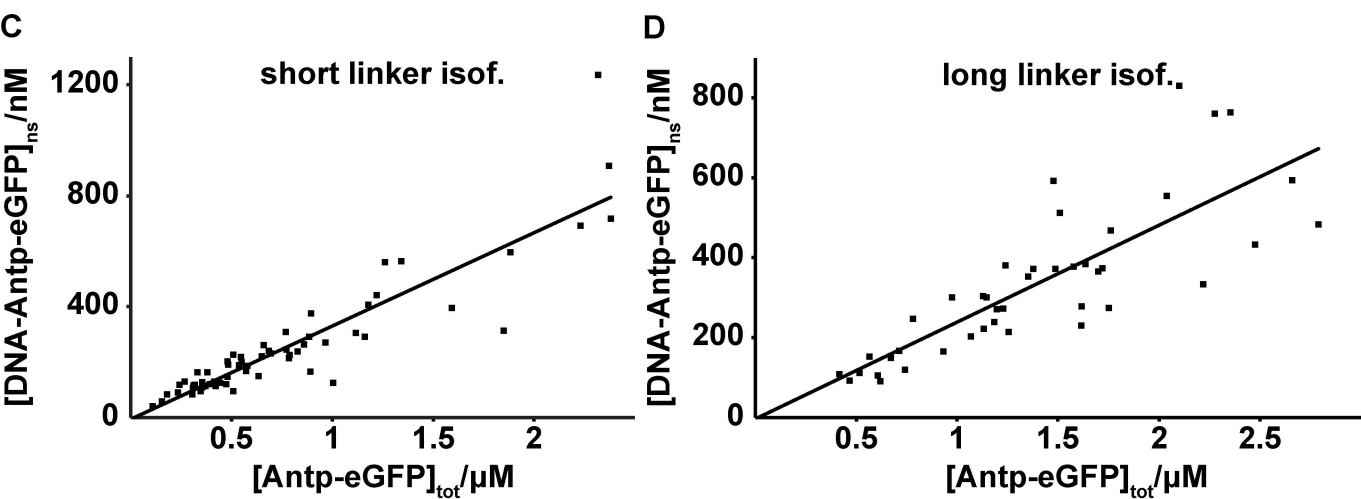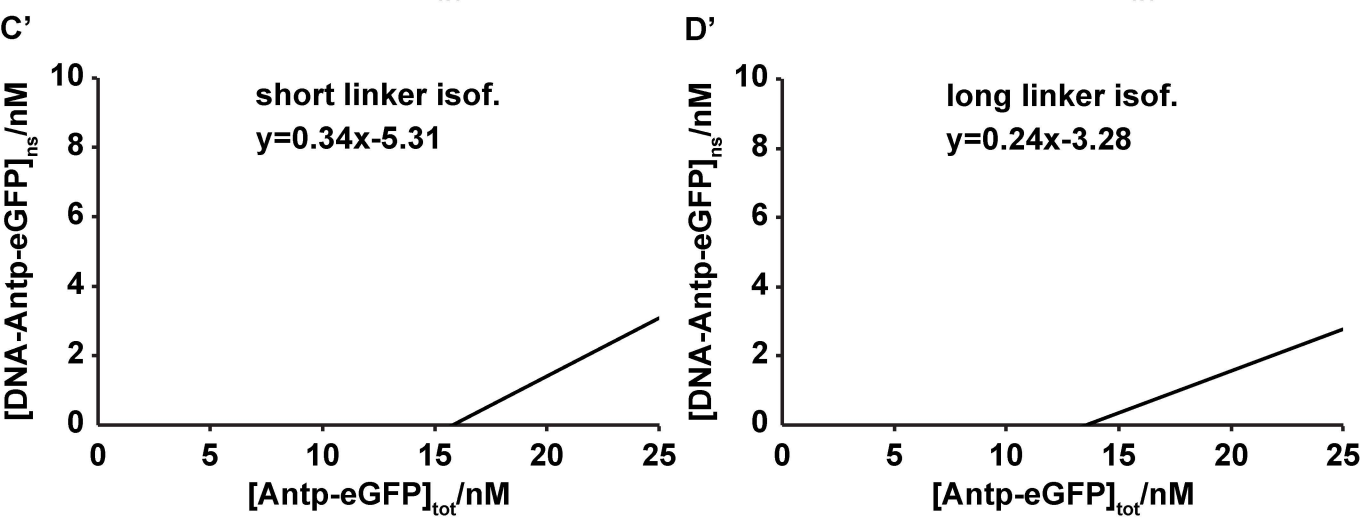

Figure 4 - figure supplement 3

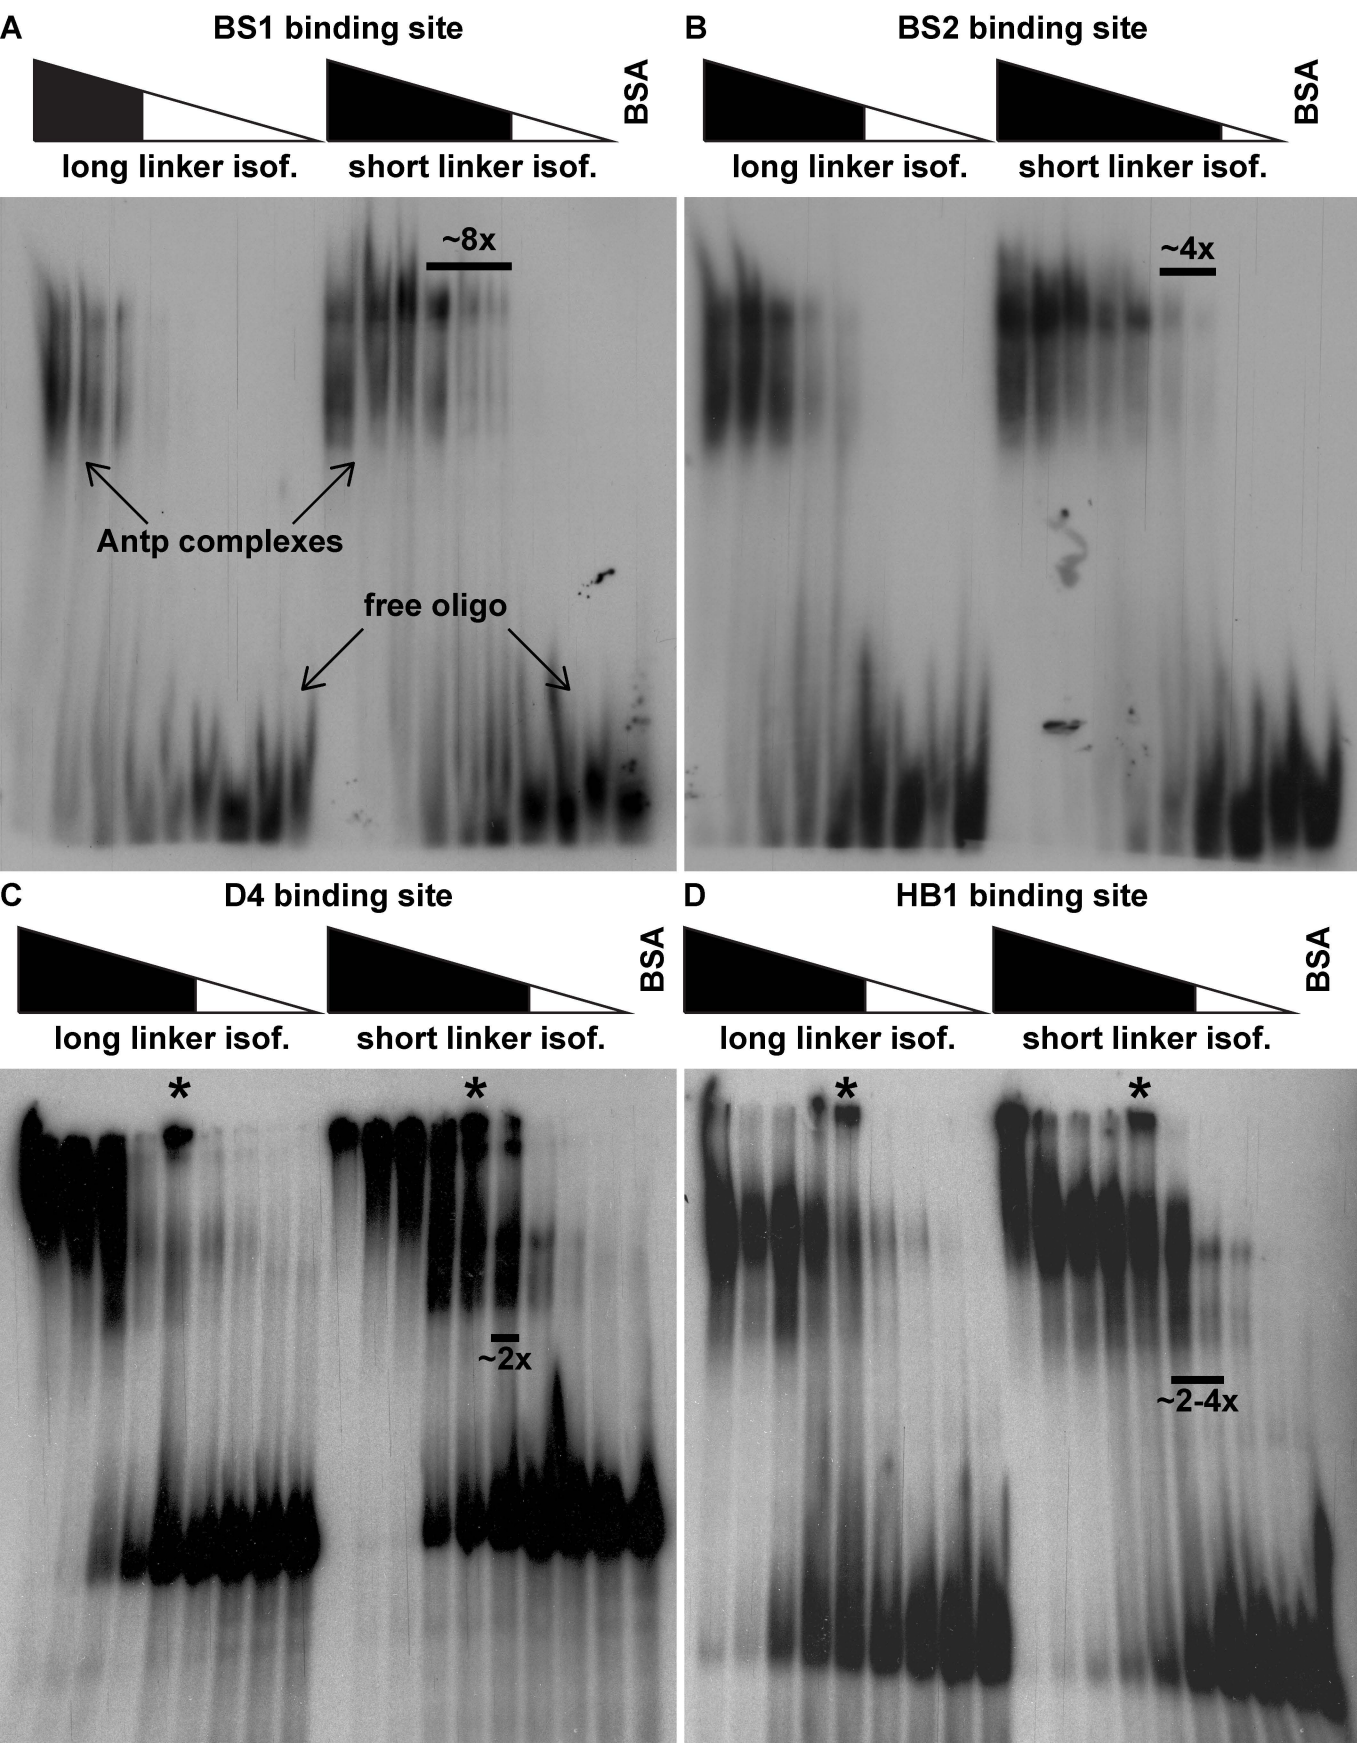

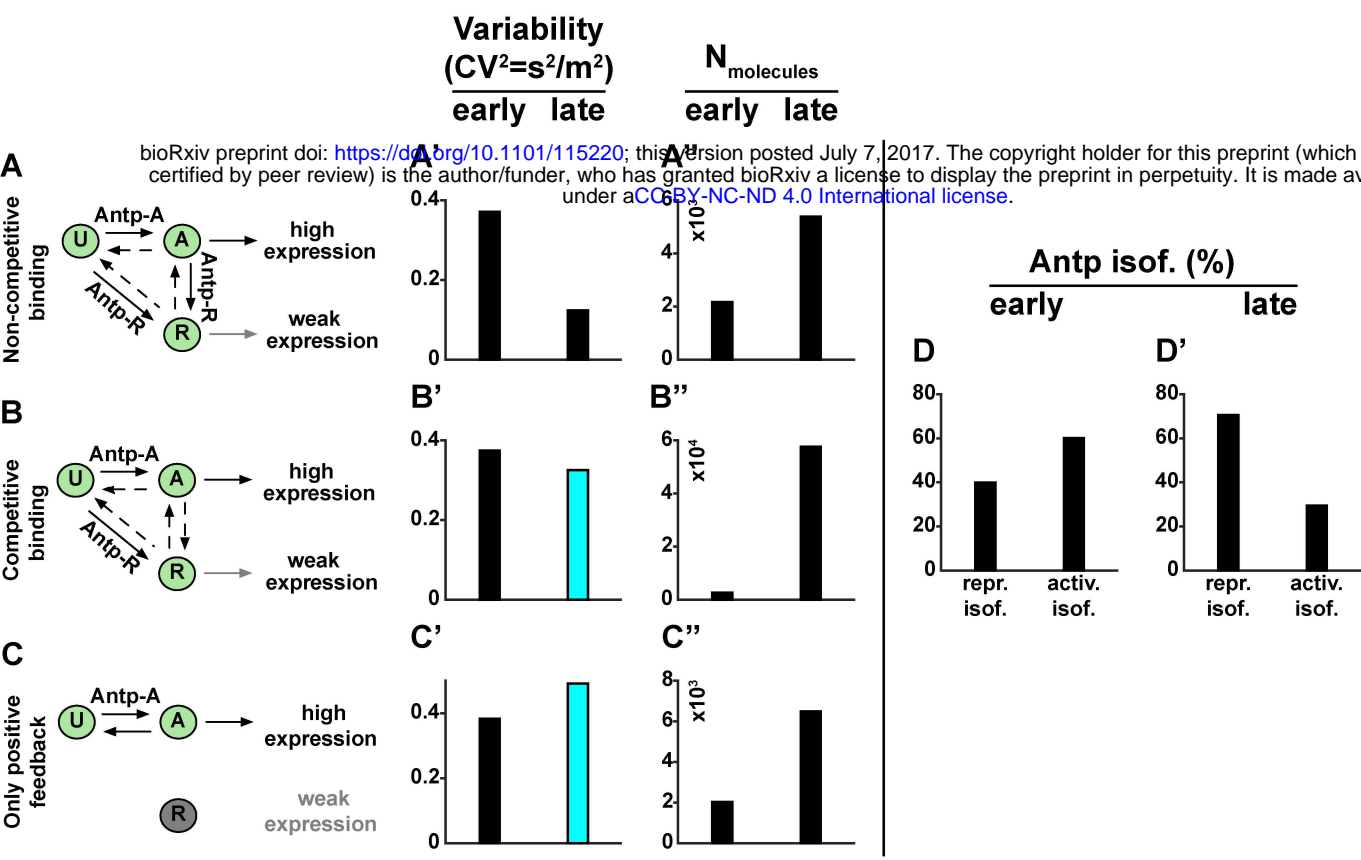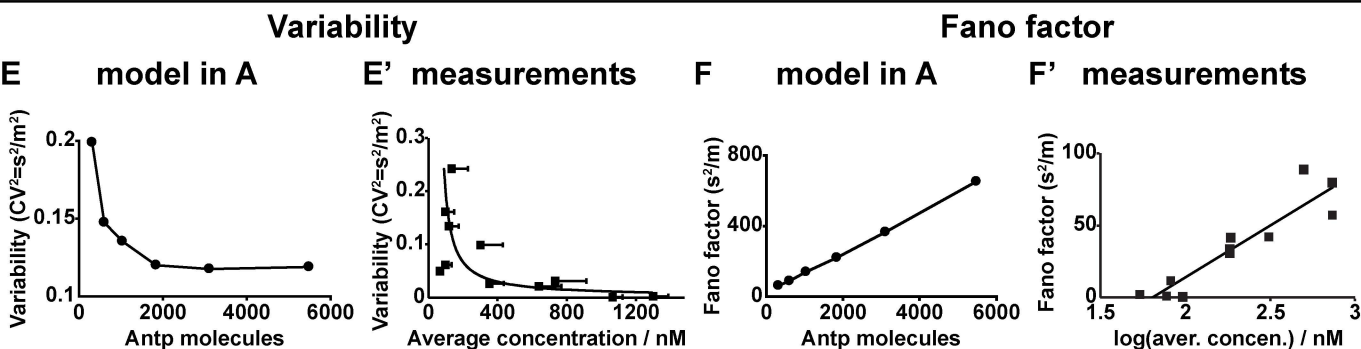

**Perturbations (constit. activation/repression by Antp isoforms)**

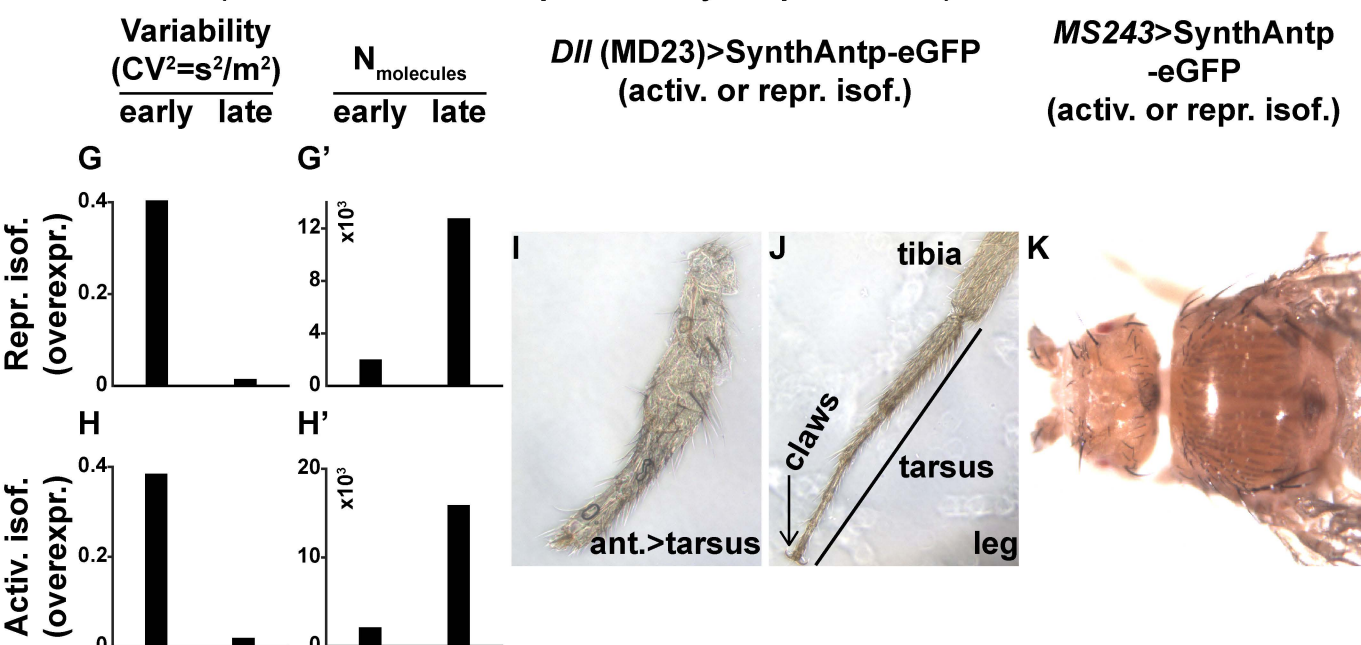

**Perturbations (constit. repression by exogenous repressor)**

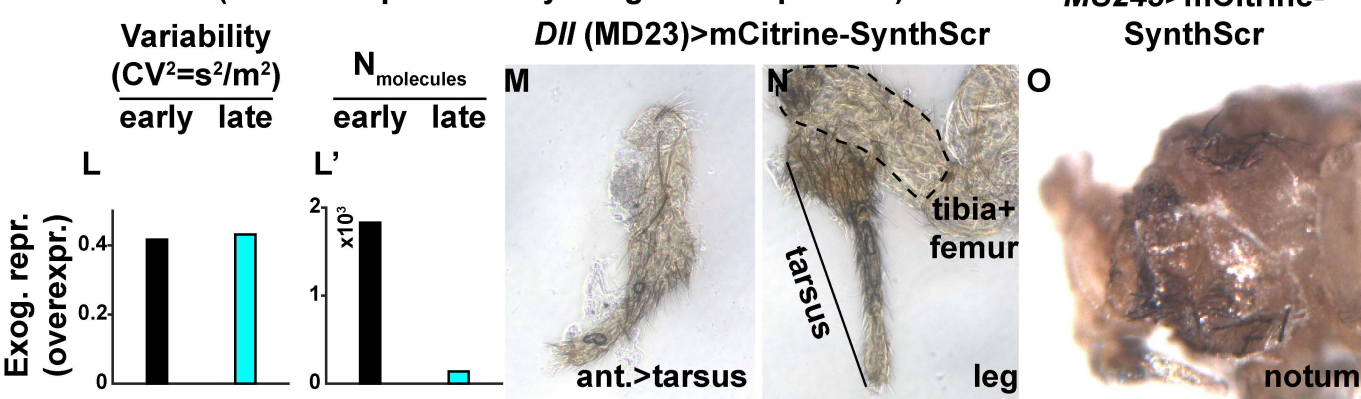

Figure 5 - figure supplement 1

*ubi-mRFP1(NLS), Antp-eGFP (MiMIC)*

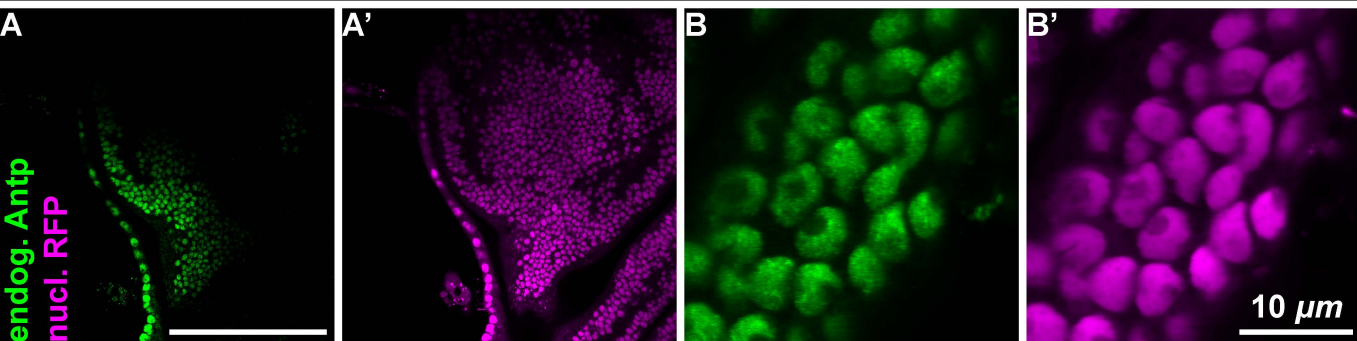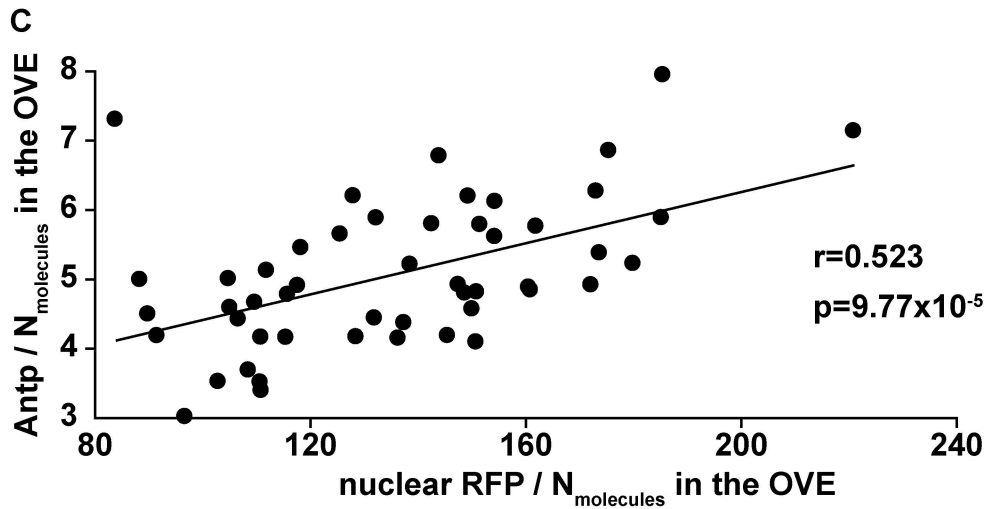



Protein repression by SynthAntp

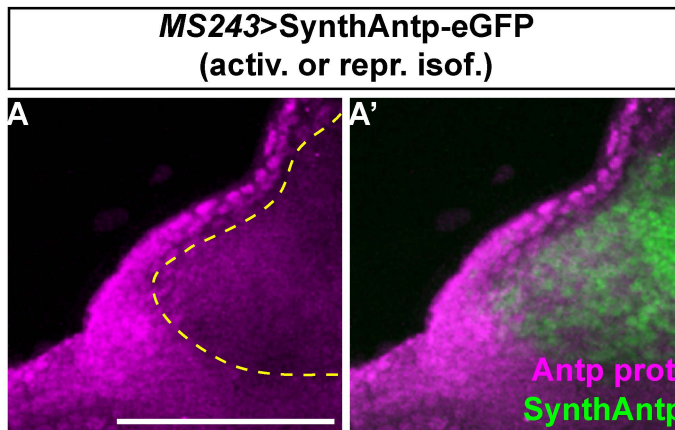

Protein repression by SynthScr

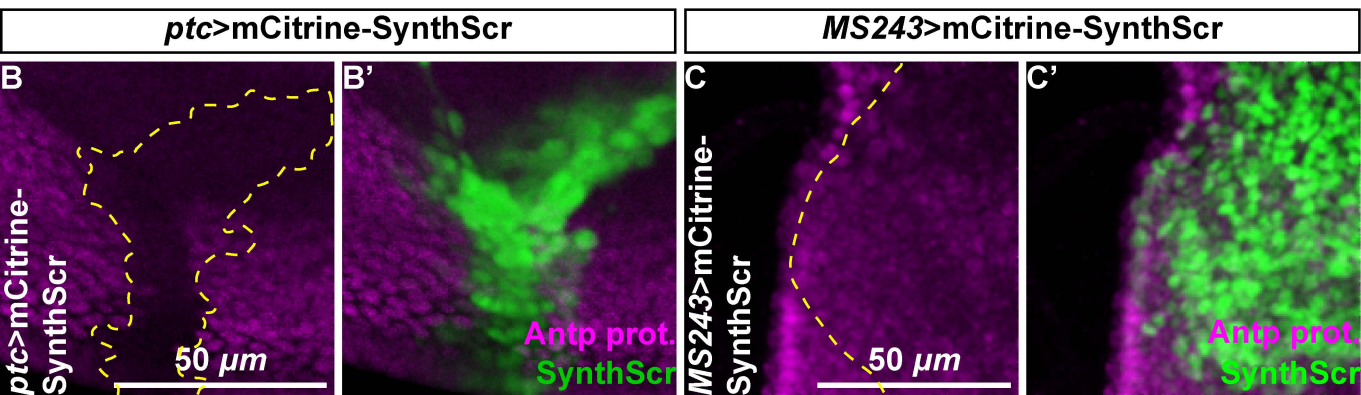

Transcripts repression by SynthScr

Non-activation of transcripts by SynthScr

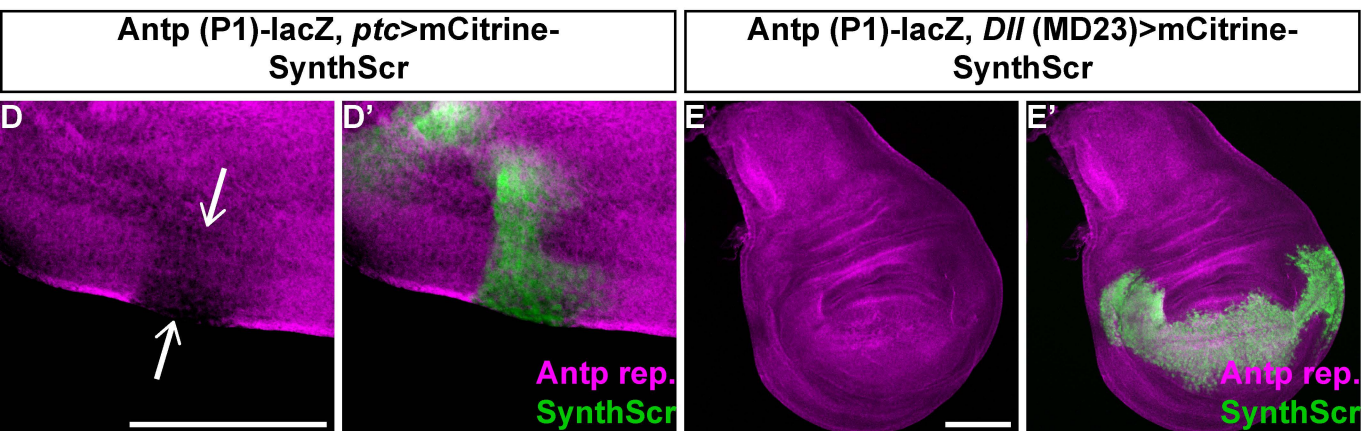

Non-auto-repression by SynthScr

*MS243 (neg. control)*

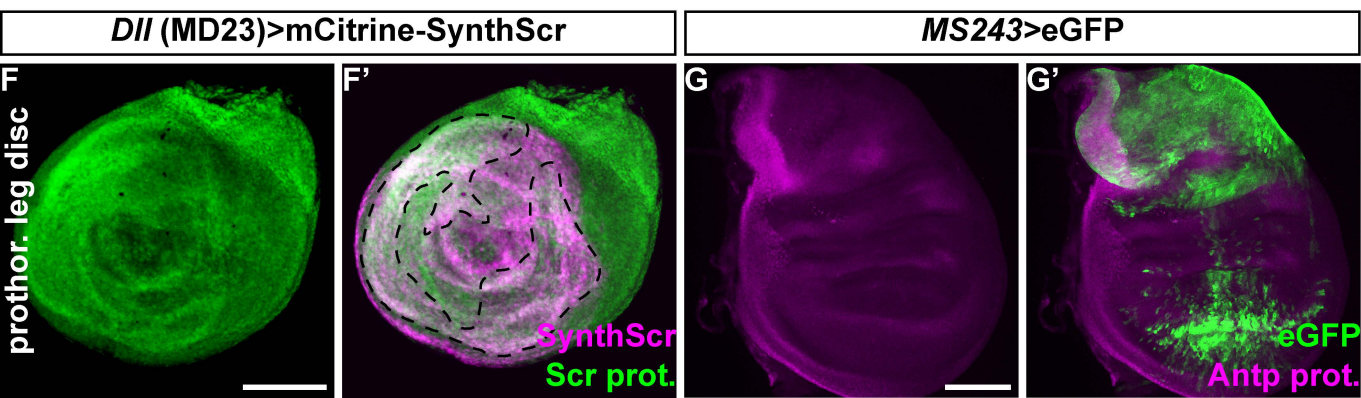

Source: http://biorxiv.org/content/10.1101/115220v2.full.pdf
